# Supplementary material for: Synthesis of functionalized 1,2,3-triazoles using Bi2WO6 nanoparticles as efficient and reusable heterogeneous catalyst in aqueous medium
Source: Royal Society of Chemistry journal article supplement (doi:10.1039/c5ra09544a), 2015-01-01

## Supporting Information

### **Synthesis of functionalized 1,2,3-triazoles using Bi<sub>2</sub>WO<sub>6</sub> nanoparticles as efficient and reusable heterogeneous catalyst in aqueous medium<sup>†</sup>**

Banoth Paplal,<sup>a</sup> Sakkani Nagaraju,<sup>a</sup> Palakollu Veerabhadraiah,<sup>b</sup> Sriram Kanvah,<sup>b</sup>  
B. Vijaya Kumar<sup>c</sup> and Dhurke Kashinath<sup>a\*</sup>

<sup>a</sup>Department of Chemistry, National Institute of Technology, Warangal-506 004, India

e-mail: kashinath@nitw.ac.in; kashinath.dhurke@gmail.com

Tel. +91-870-2462677; FAX No. +91-870-2459547

<sup>b</sup>Department of Chemistry, Indian Institute of Technology, Gandhinagar, Ahmedabad, India

<sup>c</sup>Department of Chemistry, Nizam College, Osmania University, Hyderabad, India.

## **Experimental**

### **General:**

All the aldehydes utilized for the preparation of  $\beta$ -nitrostyrenes, chalcones were purchased from Loba / SRL / sd-fine chemicals and used as received. Commercial solvents (toluene, ethylacetate (EtOAc) petroleum ether) were used for the reaction and purification. TLC was visualized by exposing the TLC to iodine vapours or UV light. The <sup>1</sup>H- and <sup>13</sup>C-NMR were recorded on Bruker 500 MHz and 125 MHz instrument respectively. The mass spectra were recorded on Shimadzu instrument (ESI MS mode). Melting points were recorder in open capillaries using Stuart SMP30 melting point apparatus and uncorrected.

### ***General procedure for the synthesis of functionalized triazoles / enaminones:***

To a mixture of nitrostyrene / chalcone (1equiv) in water / toluene, was added alkyl/aryl (1 equiv) followed by Bi<sub>2</sub>WO<sub>6</sub> (10 mol %) and the mixture was heated to 80 oC for 2-5 h. After completion of the reaction, the contents were transferred to a separating funnel and extracted with EtOAc (3 x 10 mL). The combined organic layers were washed with brine, water, dried over Na<sub>2</sub>SO<sub>4</sub> and filtered. Evaporation of the solvent gave the crude product which was purified by silica gel column chromatography. Elution of the column with EtOAc:petroleium ether gave the desired product.

**Procedure for the Cu-mediated Azide-alkyne (CuAAC) cycloaddition reaction using Bi<sub>2</sub>WO<sub>6</sub> catalyst:**

To a mixture of phenylacetylene / chalcone (1 equiv) and azide (1.5 equiv) in water were added Bi<sub>2</sub>WO<sub>6</sub> (10 mol%), CuSO<sub>4</sub> .5H<sub>2</sub>O (2 mol%) and sodium ascorbate (10 mol%) and the mixture was stirred at room temperature / heated at 80 oC. After completion of the reaction (as monitored by TLC), the contents were transferred to separating funnel and extracted with EtOAc (3X 10 mL). The combined organic layers were washed with brine, water, dried over Na<sub>2</sub>SO<sub>4</sub> and filtered. Evaporation of the solvent gave the pure desired product.

**Table-1: Physical data (Melting Points) of the known compounds:**

| S. No | Product Number | Measured M.P. °C | Reported M.P. °C     |
|-------|----------------|------------------|----------------------|
| 1     | 6              | 111-112          | 112-113 <sup>1</sup> |
| 2     | 7              | 169-170          | 170-172 <sup>2</sup> |
| 3     | 12             | 179-181          | 180-181 <sup>1</sup> |
| 4     | 13             | 130-133          | 132-134 <sup>1</sup> |
| 5     | 14             | 98-99            | 96-99 <sup>1</sup>   |
| 6     | 19             | 150-152          | 149-151 <sup>1</sup> |
| 7     | 21             | 144-145          | 143-144 <sup>1</sup> |
| 8     | 23             | 144-145          | 144-145 <sup>5</sup> |
| 9     | 34             | 101-102          | 101-103 <sup>2</sup> |
| 10    | 39             | 101-102          | 100-101 <sup>3</sup> |
| 11    | 40             | 82-84            | 83-84 <sup>4</sup>   |
| 12    | 48             | 110-112          | 111-113 <sup>3</sup> |
| 13    | 49             | 104-105          | 105-107 <sup>3</sup> |
| 14    | 50             | 128-130          | 129-131 <sup>3</sup> |
| 15    | 61             | 104-106          | 105-106 <sup>4</sup> |

1. Y-C. Wang, Y-Y. Xie, H-E. Qu, H-S. Wang, Y-M. Pan, F-P. Huang, *J. Org. Chem.*, **2014**, *79*, 4463–4469.
2. B. Kaboudin, Y. Abedi, T. Yokomatsu, *Org. Biomol. Chem.*, **2012**, *10*, 4543–4548.
3. Y-Y. Xie, Y-C. Wang, H-E. Qu, X-C. Tan, H-S. Wang, Y-M. Pan, *Adv. Synth. Catal.*, **2014**, *16*, 3347–3355.
4. W. Li, Z. Du, K. Zhang, J. Wang, *Green Chem.*, **2015**, *17*, 781–784.
5. S. Ueda, M. Su, S. L. Buchwald, *Angew. Chem.*, **2011**, *50*, 8944–8947.
6. B. Paplall, S. Nagaraju, V. Palakollu, K. Sujatha, S. Kanvah, B.V. Kumar, D. Kashinath, *RSC Advances*, **2014**, *4*, 54168–54174.

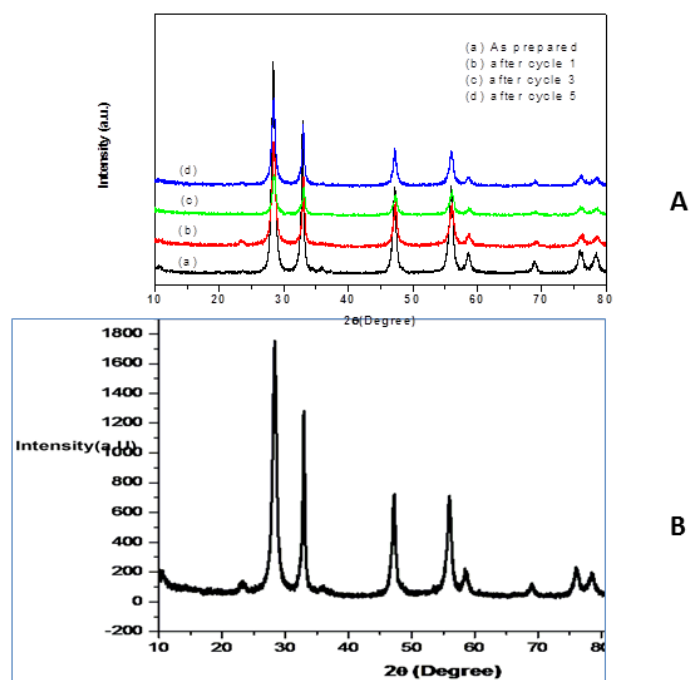

**Figure-1:** A: Reported Powder XRD data of  $\text{Bi}_2\text{WO}_6$  reported in earlier publication<sup>6</sup>  
 B: Powder XRD data of current catalyst after 5<sup>th</sup> cycle of reaction in water

#### Characterization data of Triazoles and Enaminones:

**1-benzyl-5-phenyl-1*H*-1,2,3-triazole (3):** Yield = 95% (White solid);  
 M.P: 73-74 °C; Mass (ESI-MS Spectrum): m/z Calculated: 235; Observed:  
 236 (M+1).

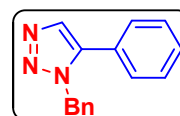

**1-benzyl-4-phenyl-1*H*-1,2,3-triazole (4):** Yield = 99% (White solid),  
 M.P: 130-132 °C; <sup>1</sup>H-NMR (500 MHz,  $\text{CDCl}_3$ ):  $\delta$  7.80 (d,  $J$  = 7.1 Hz,  
 2H), 7.66 (s, 1H), 7.42 – 7.37 (m, 5H), 7.33 – 7.26 (m, 3H), 5.58 (s,  
 2H). <sup>13</sup>C-NMR (126 MHz,  $\text{CDCl}_3$ ):  $\delta$  151.75, 148.27, 134.71, 130.56,  
 129.18, 128.18, 125.72, 119.47, 54.25.

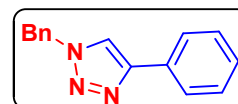

Mass (ESI-MS Spectrum): m/z Calculated: 235; Observed: 236 (M+1).

#### **1-benzyl-5-(4-methoxyphenyl)-1*H*-1,2,3-triazole (8):**

Yield = 90% (Yellow oil); <sup>1</sup>H-NMR (500 MHz,  $\text{CDCl}_3$ ):  $\delta$  7.69 (s,  
 1H), 7.28 (d,  $J$  = 7 Hz, 3H), 7.16 (d,  $J$  = 9 Hz, 2H), 7.08 (t,  $J$  = 2 Hz,  
 2H), 6.92 (d,  $J$  = 8.5 Hz, 2H), 5.52 (s, 2H), 3.83 (s, 3H).

Mass (ESI-MS Spectrum): m/z Calculated: 265; Observed: 266 (M+1).

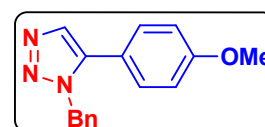

**1-benzyl-5-(4-bromophenyl)-1*H*-1,2,3-triazole (9):** Yield = 92%  
 (Yellow solid), Mass (ESI-MS Spectrum): m/z Calculated: 313;  
 Observed: 314.

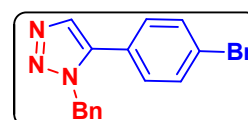

**1-benzyl-5-(4-chlorophenyl)-1*H*-1,2,3-triazole (10):**

Yield = 85% (White solid), M.P : 64-65°C, Mass (ESI-MS Spectrum):  
m/z Calculated: 269; Observed: 270 (M+1).

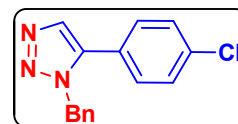**2-(1-benzyl-1*H*-1,2,3-triazol-5-yl)-6-methoxyphenol (11):**

Yield = 92% (Yellow oil); <sup>1</sup>H-NMR (500 MHz, CDCl<sub>3</sub>): δ 7.72 (s, 1H), 7.31 (t, *J* = 6.3 Hz, 3H), 7.13 (d, *J* = 6.2 Hz, 2H), 6.89 (d, *J* = 8.4 Hz, 2H), 6.77 (d, *J* = 6.4 Hz, 1H), 5.84 (s, 1H), 5.57 (s, 2H), 3.96 (s, 3H). <sup>13</sup>C-NMR (126 MHz, CDCl<sub>3</sub>): δ 147.54, 145.95, 137.95, 135.63, 133.10, 128.83, 128.12, 127.12, 121.02, 119.86, 115.07, 110.82, 56.04, 51.70.

Mass (ESI-MS Spectrum): m/z Calculated: 281; Observed: 282 (M+1).

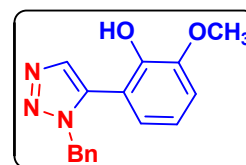

**1-benzyl-5-(3-nitrophenyl)-1*H*-1,2,3-triazole(15):** Yield = 83% (Yellow solid); Mass (ESI-MS Spectrum): m/z Calculated: 280; Observed: 281 (M+1).

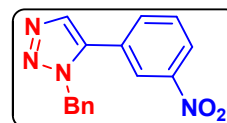

**1-benzyl-5-(naphthalene-1-yl)-1*H*-1,2,3-triazole (16):** Yield = 79% (Yellow oil); <sup>1</sup>H-NMR (500 MHz, CDCl<sub>3</sub>): δ 8.00 (d, *J* = 8.2 Hz, 1H), 7.95 (d, *J* = 8.2 Hz, 1H), 7.84 (s, 1H), 7.55 (d, *J* = 7.1 Hz, 1H), 7.52 – 7.46 (m, 1H), 7.44 (t, *J* = 7.2 Hz, 1H), 7.37 (d, *J* = 8.3 Hz, 1H), 7.23 (d, *J* = 6.9 Hz, 1H), 7.15 (dt, *J* = 14.5, 7.0 Hz, 3H), 6.87 (d, *J* = 7.1 Hz, 2H), 5.36 (s, 2H). <sup>13</sup>C-NMR (126 MHz, CDCl<sub>3</sub>): δ 135.88, 134.93, 134.80, 133.47, 131.97, 131.68, 130.29, 128.84, 128.77, 128.49, 128.09, 127.76, 127.21, 126.55, 124.99, 124.66, 124.30, 123.56, 52.25.

Mass (ESI-MS Spectrum): m/z Calculated: 285; Observed: 286 (M+1).

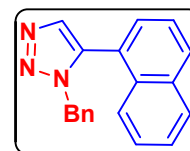

**1-benzyl-5-(furan-2-yl)-1*H*-1,2,3-triazole (17):** Yield = 80% (Yellow solid); M.P: 80-81 °C; Mass (ESI-MS Spectrum): m/z Calculated: 225; Observed: 226 (M+1).

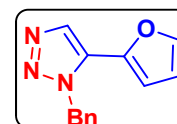

**5-(4-methoxyphenyl)-1-phenyl-1*H*-1,2,3-triazol (18):** Yield = 89% (Yellow oil); <sup>1</sup>H-NMR (500 MHz, CDCl<sub>3</sub>): δ 7.82 (s, 1H), 7.46 – 7.49 (m, 3H), 7.37 (d, *J* = 5Hz, 2H), 7.15 (d, *J* = 8.7 Hz, 2H), 6.87 (d, *J* = 8.7 Hz, 2H), 3.81 (s, 3H).

Mass (ESI-MS Spectrum): m/z Calculated: 251; Observed: 252 (M+1).

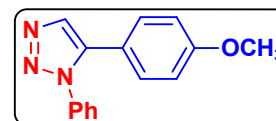

**5-(4-chlorophenyl)-1-phenyl-1*H*-1,2,3-triazole(20):** Yield = 86% (White solid); Mass (ESI-MS Spectrum): m/z Calculated: 255; Observed: 254 (M-1).

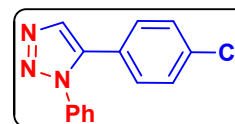

**5-(naphthalene-1-yl)-1phenyl-1*H*-1,2,3-Triazole (22):** Yield = 82% (Yellow oil); Mass (ESI-MS Spectrum): m/z Calculated: 271; Observed: 271

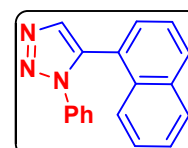

**4-(4-chlorophenyl)-1H-1,2,3-triazole (24):** Yield = 85% (White solid),  $^1\text{H-NMR}$  (500 MHz,  $\text{CDCl}_3$ )  $\delta$  7.98 (s, 1H), 7.79 (d,  $J = 8.4$  Hz, 2H), 7.46 (d,  $J = 8.4$  Hz, 2H).

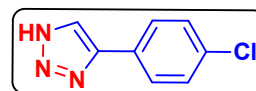

**2-methoxy-6-(1H-1,2,3-triazol-4-yl) phenol (26):**

Yield = 80% (White solid), Mass (ESI-MS Spectrum):  $m/z$  Calculated: 191; Observed: 192 (M+1).

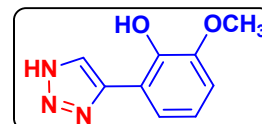

**(1-benzyl-1H-1,2,3-triazole-4-yl)methanol (33):** Yield = 92% (White solid), M.P: 79-80°C,  $^1\text{H-NMR}$  (500 MHz,  $\text{CDCl}_3$ ):  $\delta$  7.46 (s, 1H), 7.38 – 7.34 (m, 3H), 7.27 – 7.24 (m, 2H), 5.49 (s, 2H), 4.73 (s, 2H), 3.74 (s, 1H).

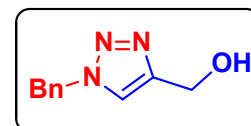

Mass (ESI-MS Spectrum):  $m/z$  Calculated: 189; Observed: 190 (M+1).

**(1-benzyl-4-((benzyloxy)methyl)-1H-1,2,3-triazole (35):** Yield = 95% (White solid), Mass (ESI-MS Spectrum):  $m/z$  Calculated: 279; Observed: 280 (M+1).

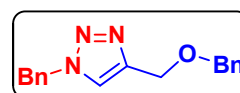

**1-(1-benzyl-5-1H-1,2,3-triazol-4-yl)ethanone (37):** Yield = 85% (Yellow oil),  $^1\text{H-NMR}$  (500 MHz,  $\text{CDCl}_3$ )  $\delta$  7.51 (d,  $J = 7.4$  Hz, 1H), 7.46 (t,  $J = 7.3$  Hz, 2H), 7.30 (d,  $J = 6.3$  Hz, 3H), 7.23 (d,  $J = 7.2$  Hz, 2H), 7.05 (d,  $J = 4.6$  Hz, 2H), 5.45 (s, 2H), 2.71 (s, 3H).  $^{13}\text{C-NMR}$  (126 MHz,  $\text{CDCl}_3$ ):  $\delta$  192.77, 143.81, 139.55, 134.64, 130.36, 130.14, 129.71, 128.86, 128.66, 128.47, 127.58, 127.21, 126.02, 51.97, 28.04.

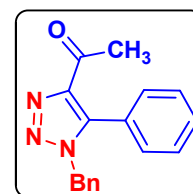

Mass (ESI-MS Spectrum):  $m/z$  Calculated: 277; Observed: 278 (M+1).

**(Z)-4-(benzylamino)-4-phenylbut-3-en-2-one (38):** Yield = 85% (Yellow oil); Mass (ESI-MS Spectrum):  $m/z$  Calculated: 251; Observed: 252 (M+1).

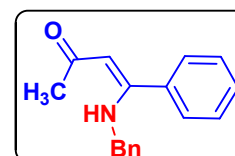

**(Z)-4-(benzylamino)-4-(4-methoxyphenyl)but-3-en-2-one (41):**

Yield = 90% (Yellow oil),  $^1\text{H-NMR}$  (500 MHz,  $\text{CDCl}_3$ ):  $\delta$  11.16 (s, 1H), 7.31 (dd,  $J = 16.0, 8.1$  Hz, 5H), 7.22 (d,  $J = 7.4$  Hz, 2H), 6.92 (d,  $J = 8.7$  Hz, 2H), 5.16 (s, 1H), 4.41 (s, 2H), 3.86 (s, 3H), 2.13 (s, 3H).  $^{13}\text{C-NMR}$  (126 MHz,  $\text{CDCl}_3$ ):  $\delta$  195.98, 165.17, 160.57, 138.79, 129.26, 128.69, 127.42, 127.27, 126.73, 113.85, 97.27, 55.35, 48.24, 29.26.

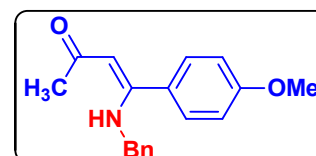

Mass (ESI-MS Spectrum):  $m/z$  Calculated: 281; Observed: 282 (M+1).

**(Z)-4-(benzylamino)-4-(3,4-dimethoxyphenyl)but-3-en-2-one (42):**

Yield = 91% (Yellow oil),  $^1\text{H-NMR}$  (500 MHz,  $\text{CDCl}_3$ ):  $\delta$  11.17 (s, 1H), 7.33 (d,  $J = 7.3$  Hz, 2H), 7.29 – 7.25 (m, 1H), 7.23 (d,  $J = 7.5$  Hz, 2H), 6.94 (d,  $J = 8.2$  Hz, 1H), 6.88 (d,  $J = 8.2$  Hz, 1H), 6.76 (s, 1H), 5.18 (s, 1H), 4.40 (s, 2H), 3.92 (s, 3H), 3.70 (s, 3H), 2.14 (s,

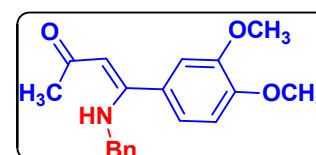

3H). <sup>13</sup>C-NMR (126 MHz, CDCl<sub>3</sub>): δ 196.11, 165.33, 150.02, 148.65, 139.12, 128.70, 127.59, 127.22, 126.58, 120.50, 110.87, 97.16, 55.94, 48.21, 29.27.

Mass (ESI-MS Spectrum): m/z Calculated: 311; Observed: 312 (M+1).

**(Z)-4-(benzylamino)-4-(4-bromophenyl)but-3-en-2-one (43):** Yield = 92% (Yellow oil), <sup>1</sup>H-NMR (500 MHz, CDCl<sub>3</sub>): δ 11.04 (s, 1H), 7.52 (s, 1H), 7.50 (s, 1H), 7.31 (t, *J* = 7.3 Hz, 2H), 7.25 (d, *J* = 8.2 Hz, 1H), 7.17 (dd, *J* = 13.4, 7.7 Hz, 4H), 5.10 (s, 1H), 4.31 (s, 2H), 2.11 (s, 3H).

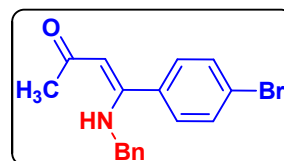

Mass (ESI-MS Spectrum): m/z Calculated: 330; Observed: 332 (M+2).

**(Z)-4-(benzylamino)-4-(4-chlorophenyl)but-3-en-2-one (44):**

Yield = 87% (White solid), <sup>1</sup>H-NMR (500 MHz, CDCl<sub>3</sub>): δ 11.04 (s, 1H), 7.35 (d, *J* = 8.5 Hz, 2H), 7.31 – 7.25 (m, 4H), 7.24 (d, *J* = 2.7 Hz, 1H), 7.16 (d, *J* = 6.9 Hz, 2H), 5.10 (s, 1H), 4.30 (s, 2H), 2.11 (s, 3H). <sup>13</sup>C NMR (126 MHz, CDCl<sub>3</sub>): δ 196.50, 163.73, 138.50, 135.57, 133.57, 129.16, 128.76, 128.74, 127.39, 126.68, 97.47, 48.16, 30.93.

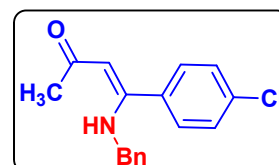

Mass (ESI-MS Spectrum): m/z Calculated: 285; Observed: 286 (M+1).

**(Z)-4-(benzylamino)-4-(3-nitrophenyl)but-3-en-2-one (45):**

Yield = 85% (Yellow oil), <sup>1</sup>H-NMR (500 MHz, CDCl<sub>3</sub>): δ 11.03 (s, 1H), 8.29 (d, *J* = 10 Hz, 1H), 8.20 (s, 1H), 7.66-7.59 (m, 2H), 7.34-7.28 (m, 3H), 7.15 (d, *J* = 5 Hz, 2H), 5.17 (s, 1H), 4.33 (s, 2H), 2.17 (s, 3H). <sup>13</sup>C-NMR (126 MHz, CDCl<sub>3</sub>): δ 197.01, 161.82, 138.13, 136.83, 133.69, 129.60, 128.84, 127.60, 126.68, 124.70, 124.23, 122.96, 98.03, 48.26, 29.53. Mass (ESI-MS Spectrum): m/z Calculated: 296; Observed: 297 (M+1).

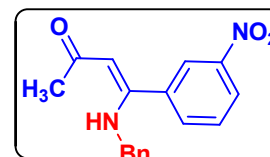

**(Z)-4-(benzylamino)-4-(4-nitrophenyl)but-3-en-2-one (46):**

Yield = 80% (Yellow oil); <sup>1</sup>H-NMR (500 MHz, CDCl<sub>3</sub>): δ 10.99 (s, 1H), 8.23 (d, *J* = 8.6 Hz, 2H), 7.48 (d, *J* = 8.6 Hz, 2H), 7.31 (t, *J* = 7.2 Hz, 2H), 7.26 (d, *J* = 4.7 Hz, 1H), 7.13 (d, *J* = 7.2 Hz, 2H), 5.12 (s, 1H), 4.27 (s, 2H), 2.14 (s, 3H). <sup>13</sup>C NMR (126 MHz, CDCl<sub>3</sub>): δ 197.02, 162.13, 148.36, 141.44, 138.15, 128.92, 128.84, 127.99, 126.61, 123.73, 97.84, 48.24, 29.55.

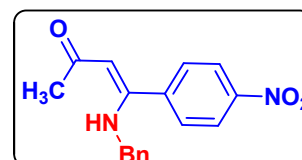

Mass (ESI-MS Spectrum): m/z Calculated: 296; Observed: 297 (M+1).

**(Z)-4-(benzylamino)-4-(naphthalene-1-yl)but-3-en-2-one (47):**

Yield = 80% (Yellow oil), Mass (ESI-MS Spectrum): m/z Calculated: 301; Observed: 302 (M+1).

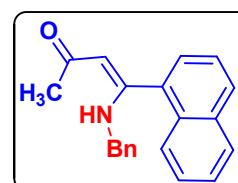

**(Z)-3-(benzylamino)-3-(4-nitrophenyl)-1-phenylprop-2-en-1-one (50):**

Yield = 82% (Yellow solid), M.P: 142-143 °C, <sup>1</sup>H-NMR (500 MHz, CDCl<sub>3</sub>): δ 11.61 (s, 1H), 8.31 (d, *J* = 8.7 Hz, 2H), 7.93 (d, *J* = 7.1 Hz, 2H), 7.59 (d, *J* = 8.7 Hz, 2H), 7.48 (dd, *J* = 18.8, 7.4 Hz, 2H), 7.36 (t, *J* = 7.3 Hz, 2H), 7.32 – 7.29 (m, 2H), 7.21 (d, *J* = 7.3 Hz, 2H), 5.85

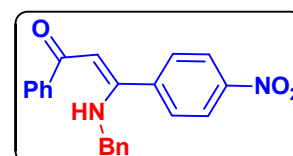

(s, 1H), 4.39 (s, 2H). <sup>13</sup>C NMR (126 MHz, CDCl<sub>3</sub>): δ 189.40, 163.77, 141.69, 139.61, 137.94, 131.33, 128.94, 128.38, 127.70, 127.18, 126.75, 123.84, 94.36, 48.50.

Mass (ESI-MS Spectrum): m/z Calculated: 358; Observed: 359 (M+1).

**1-(1-benzyl-5-(3,4-dimethoxyphenyl)-1H-1,2,3-triazol-4-yl)ethanone (52):**

Yield = 85% (Yellow oil), <sup>1</sup>H-NMR (500 MHz, CDCl<sub>3</sub>): δ 7.30 (s, 3H), 7.08 (d, *J* = 2.8 Hz, 2H), 6.93 (d, *J* = 8.1 Hz, 1H), 6.85 (d, *J* = 8.2 Hz, 1H), 6.62 (s, 1H), 5.44 (s, 2H), 3.94 (s, 3H), 3.67 (s, 3H), 2.70 (s, 3H). <sup>13</sup>C-NMR (126 MHz, CDCl<sub>3</sub>): δ 192.83, 150.43, 148.81, 143.64, 139.54, 135.14, 128.90, 128.39, 127.33, 122.65, 117.82, 112.76, 111.02, 55.94, 55.75, 51.90, 28.10.

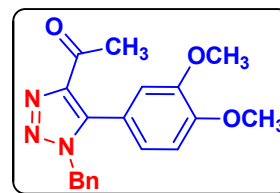

Mass (ESI-MS Spectrum): m/z Calculated: 337.14; Observed: 338 (M+1)

**1-(1-benzyl-5-(4-methoxyphenyl)-1H-1,2,3-Triazole-4-yl)ethanone (53):**

Yield = 88% (Yellow oil); Mass (ESI-MS Spectrum): m/z Calculated: 307; Observed: 308 (M+1).

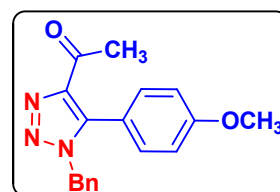

**1-(1-benzyl-5-(4-bromophenyl)-1H-1,2,3-triazol-4-yl)ethanone (54):**

Yield = 82% (Yellow oil), <sup>1</sup>H-NMR (500 MHz, CDCl<sub>3</sub>): δ 7.59 (d, *J* = 8.3 Hz, 2H), 7.31 (d, *J* = 15.7 Hz, 4H), 7.10 – 7.05 (m, 3H), 5.44 (s, 2H), 2.72 (s, 3H). <sup>13</sup>C-NMR (126 MHz, CDCl<sub>3</sub>): δ 192.82, 151.75, 143.89, 138.41, 134.47, 131.94, 131.36, 131.30, 128.98, 128.89, 128.62, 127.83, 127.44, 127.19, 124.90, 124.81, 52.07, 27.99.

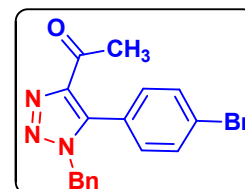

Mass (ESI-MS Spectrum): m/z Calculated: 356; Observed: 358 (M+2).

**1-(1-benzyl-5-(4-chlorophenyl)-1H-1,2,3-triazol-4-yl)ethanone (55):**

Yield = 79% (Yellow oil); <sup>1</sup>H-NMR (500 MHz, CDCl<sub>3</sub>): δ 7.40 (d, *J* = 8.4 Hz, 2H), 7.30 – 7.25 (m, 4H), 7.12 (d, *J* = 8.3 Hz, 2H), 7.02 (s, 1H), 5.41 (s, 2H), 2.69 (s, 3H).

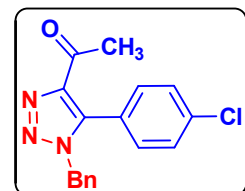

Mass (ESI-MS Spectrum): m/z Calculated: 251; Observed: 252 (M+1).

**1-(1-benzyl-5-(4-(dimethylamino)phenyl)-1H-1,2,3-triazol-4-yl)ethanone (56):**

Yield = 85% (White solid), M.P: 125-127 °C; <sup>1</sup>H-NMR (500 MHz, CDCl<sub>3</sub>): δ 7.31 (t, *J* = 10.2 Hz, 3H), 7.16 – 7.14 (m, 4H), 6.74 (d, *J* = 8.7 Hz, 2H), 5.47 (s, 2H), 3.05 (s, 6H), 2.70 (s, 3H). <sup>13</sup>C-NMR (126 MHz, CDCl<sub>3</sub>): δ 192.83, 151.30, 143.27, 140.46, 135.29, 130.81, 128.83, 128.25, 127.44, 112.04, 111.59, 51.56, 40.14, 28.16.

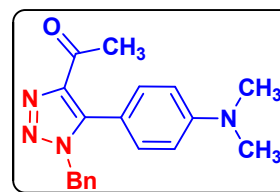

Mass (ESI-MS Spectrum): m/z Calculated: 320; Observed: 321 (M+1).

**1-(1-benzyl-5-(4-nitrophenyl)-1H-1,2,3-triazol-4-yl)ethanone (57):**

Yield = 81% (Yellow oil); <sup>1</sup>H-NMR (500 MHz, CDCl<sub>3</sub>): δ 8.27 (d, *J* = 8.8 Hz, 2H), 7.36 (d, *J* = 8.8 Hz, 2H), 7.30 – 7.26 (m, 3H), 6.99 (d, *J* = 6.4 Hz, 2H), 5.45 (s, 2H), 2.72 (s, 3H). <sup>13</sup>C-NMR (126 MHz, CDCl<sub>3</sub>): δ

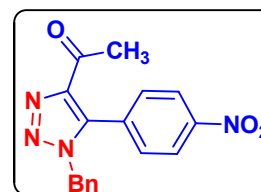

192.82, 154.17, 144.33, 137.23, 134.05, 132.74, 131.00, 130.15, 129.20 – 128.78, 127.35, 123.68, 52.48, 27.90.

Mass (ESI-MS Spectrum): m/z Calculated: 322; Observed: 323 (M+1).

**1-(1-benzyl-5-(3-nitrophenyl)-1H-1,2,3-triazol-4-yl) ethanone (58):**

Yield = 80% (Yellow oil), <sup>1</sup>H-NMR (500 MHz, CDCl<sub>3</sub>): δ 8.36 (d, *J* = 7.2 Hz, 1H), 8.04 (s, 1H), 7.64 (t, *J* = 8.0 Hz, 1H), 7.54 (d, *J* = 7.5 Hz, 1H), 7.32 – 7.29 (m, 3H), 7.03 (d, *J* = 6.0 Hz, 2H), 5.49 (s, 2H), 2.75 (s, 3H). <sup>13</sup>C-NMR (126 MHz, CDCl<sub>3</sub>): δ 192.88, 135.91, 133.96, 129.70, 129.13, 128.96, 128.90, 127.43, 127.21, 124.89, 124.83, 52.56, 27.89.

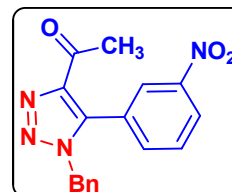

**1-(1-benzyl-5-(naphthalen-1-yl)-1H-1,2,3-triazol-4-yl)ethanone (59):**

Yield = 78% (Yellow oil), <sup>1</sup>H-NMR (500 MHz, CDCl<sub>3</sub>): δ 8.03 (d, *J* = 8.3 Hz, 1H), 7.95 (d, *J* = 8.2 Hz, 1H), 7.56 – 7.48 (m, 3H), 7.36 (dt, *J* = 12.3, 7.1 Hz, 2H), 7.20 (dd, *J* = 18.3, 7.2 Hz, 2H), 7.15 – 7.06 (m, 3H), 6.83 (d, *J* = 7.5 Hz, 2H), 5.41 (s, 1H), 5.16 (s, 1H), 2.66 (s, 3H). <sup>13</sup>C-NMR (126 MHz, CDCl<sub>3</sub>): δ 192.22, 153.78, 145.39, 137.89, 134.10, 133.44, 131.32, 130.69, 128.87, 128.62, 128.39, 127.98, 127.27, 126.55, 125.04, 124.16, 123.74, 52.45, 27.87.

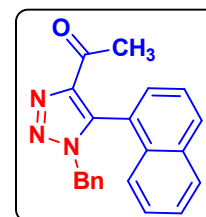

Mass (ESI-MS Spectrum): m/z Calculated: 327; Observed: 328 (M+1).

**1-(1-benzyl-5-(2-chloroquinolin-3-yl)-1H-1,2,3-triazol-4-yl)ethanone (60):**

Yield = 75% (Yellow oil), <sup>1</sup>H-NMR (500 MHz, CDCl<sub>3</sub>): δ 8.11 (d, *J* = 8.5 Hz, 1H), 7.86 (t, *J* = 7.6 Hz, 1H), 7.72 (s, 1H), 7.69 – 7.60 (m, 2H), 7.29 (s, 1H), 7.24 (d, *J* = 7.3 Hz, 1H), 7.18 (d, *J* = 7.4 Hz, 1H), 6.95 (d, *J* = 7.5 Hz, 2H), 5.68 (s, 1H), 5.32 (s, 1H), 2.73 (s, 3H). <sup>13</sup>C-NMR (126 MHz, CDCl<sub>3</sub>): δ 192.57, 148.45, 147.99, 145.57, 140.90, 134.96, 133.74, 132.05, 128.85, 128.63, 127, 126.01, 120.07, 53.05, 27.64.

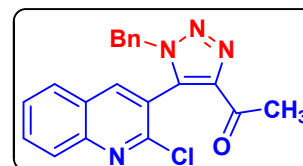

Mass (ESI-MS Spectrum): m/z Calculated: 362; Observed: 363 (M+1).

**(1-benzyl-5-(4-nitrophenyl)-1H-1,2,3-triazol-4-yl)(phenyl)methanone (62):**

Yield = 87% (Yellow solid), M.P : 105-106 °C, <sup>1</sup>H-NMR (500 MHz, CDCl<sub>3</sub>): δ 8.37 (d, *J* = 7.3 Hz, 2H), 8.32 (d, *J* = 8.8 Hz, 2H), 7.64 (t, *J* = 7.4 Hz, 1H), 7.54 (d, *J* = 7.7 Hz, 2H), 7.45 (d, *J* = 8.8 Hz, 2H), 7.34 – 7.29 (m, 3H), 7.06 (d, *J* = 7.9 Hz, 2H), 5.53 (s, 2H). <sup>13</sup>C-NMR (126 MHz, CDCl<sub>3</sub>): δ 185.90, 148.68, 144.55, 139.72, 136.58, 134.07, 133.47, 133.24, 131.07, 130.75, 129.13, 128.89, 128.40, 127.45, 123.71, 52.57.

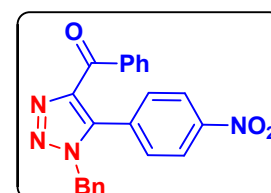

Mass (ESI-MS Spectrum): m/z Calculated: 384; Observed: 385 (M+1).

**1-benzyl-4-phenyl-1H-1,2,3-triazole**



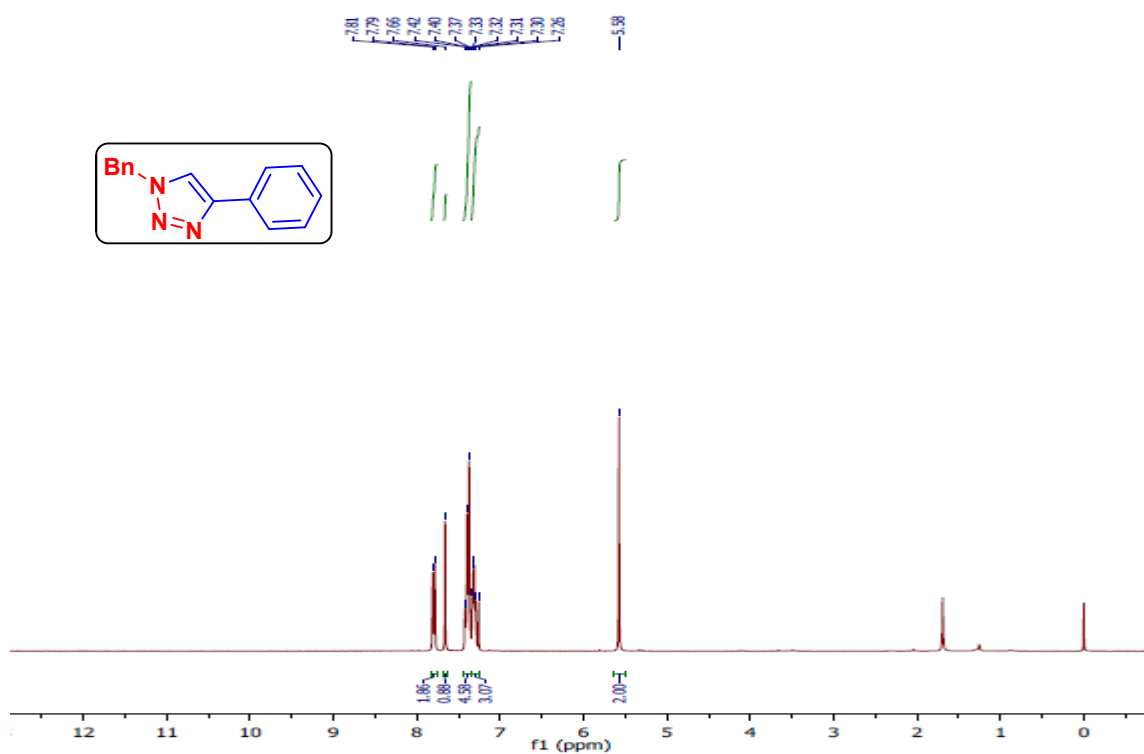

1-benzyl-4-phenyl-1*H*-1,2,3-triazole:

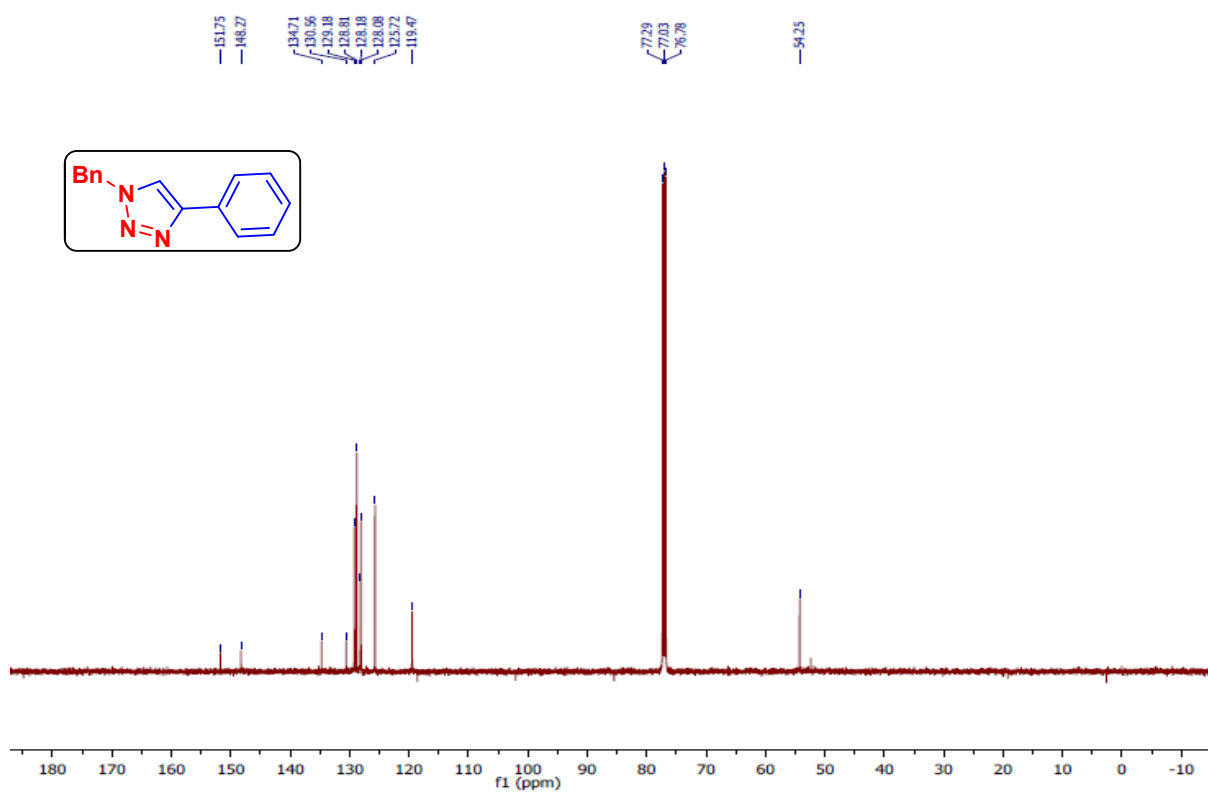

1-benzyl-4-phenyl-1*H*-1,2,3-triazole:

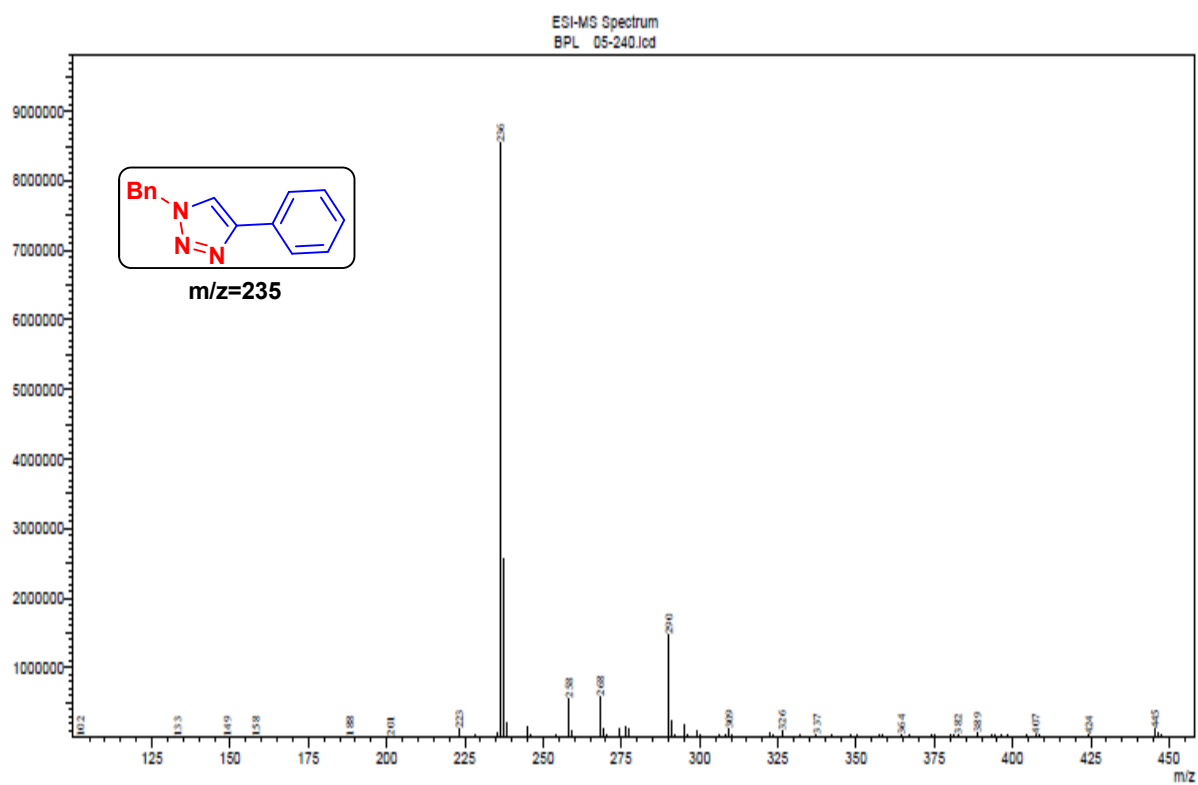

**(1-benzyl-1H-1,2,3-triazole-4-yl)methanol :**

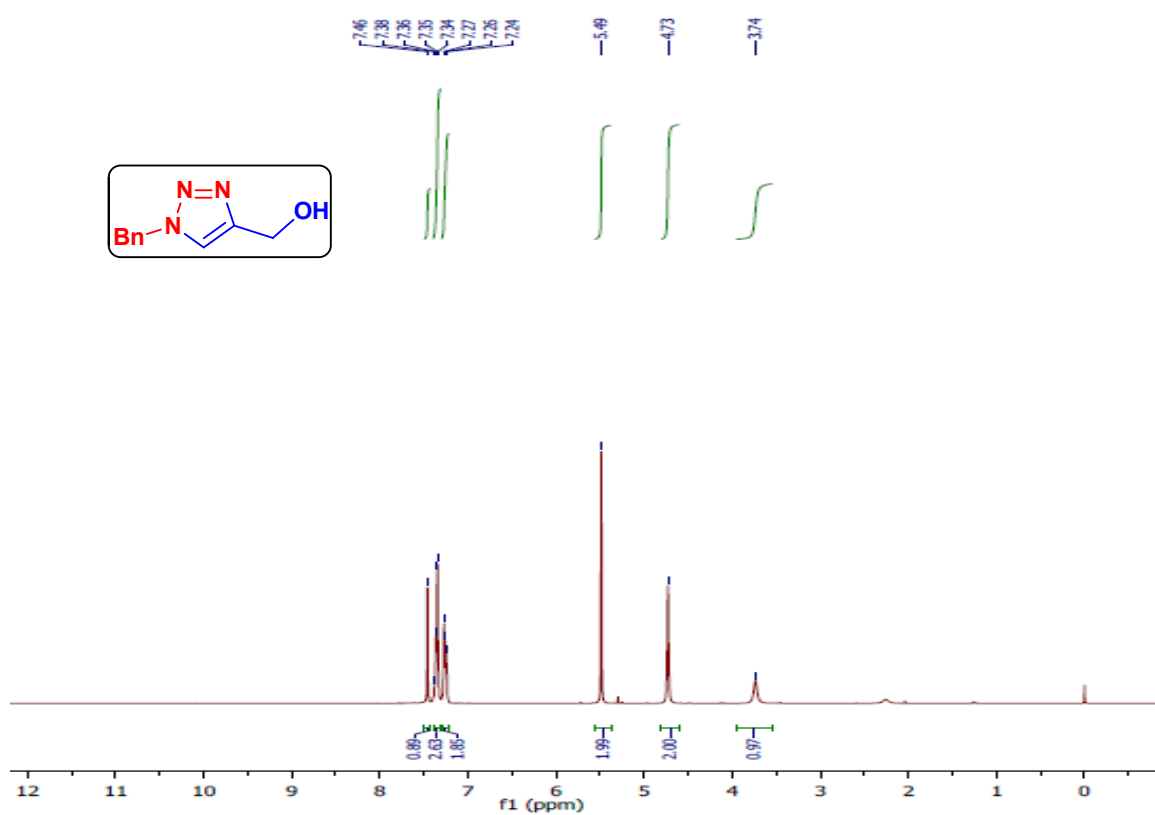

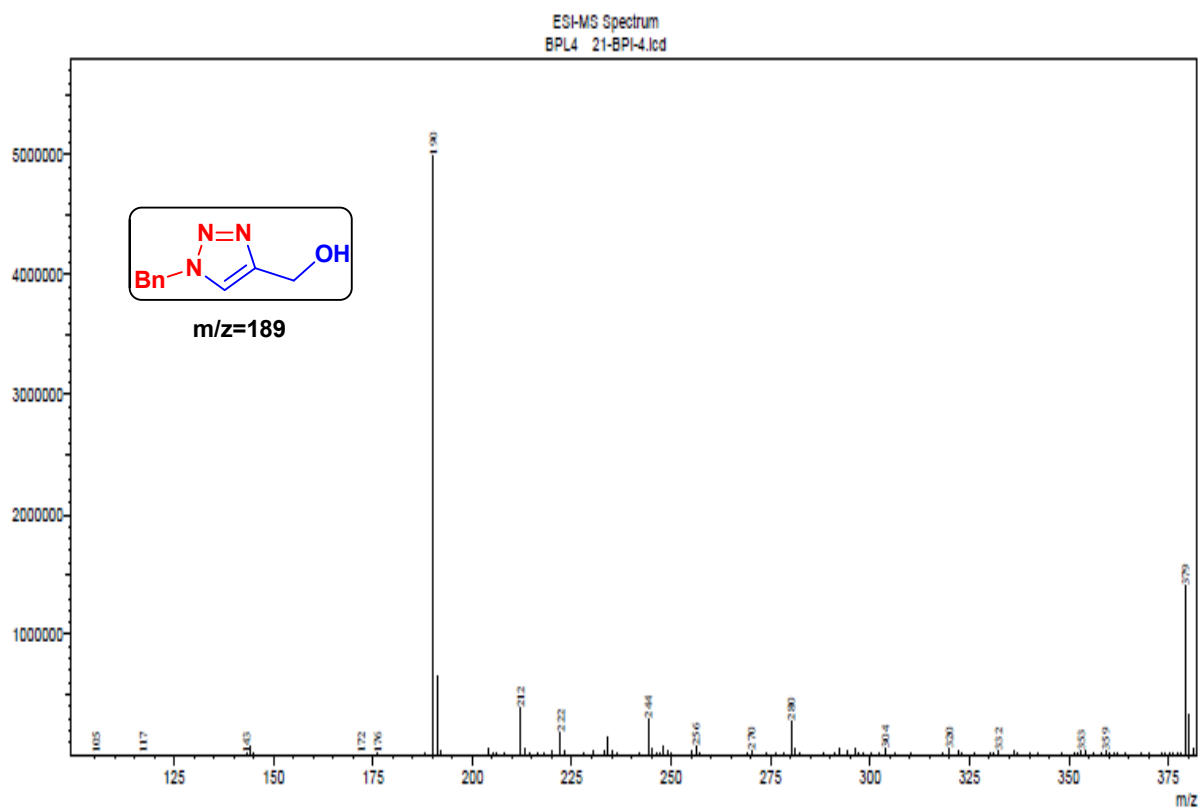

**(1-benzyl-4-((benzyloxy)methyl)-1H-1,2,3-triazole:**

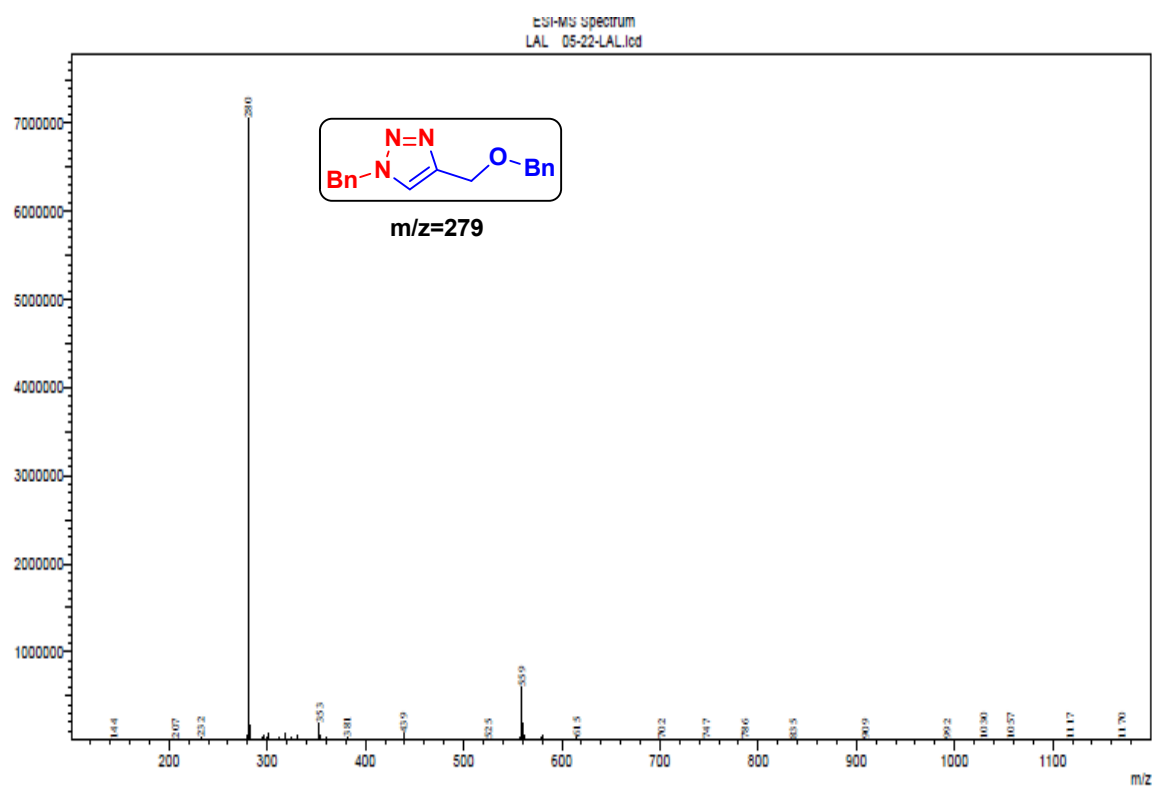

**1-benzyl-5-(4-methoxyphenyl)-1H-1,2,3-triazole:**

DK-BPL-01-146

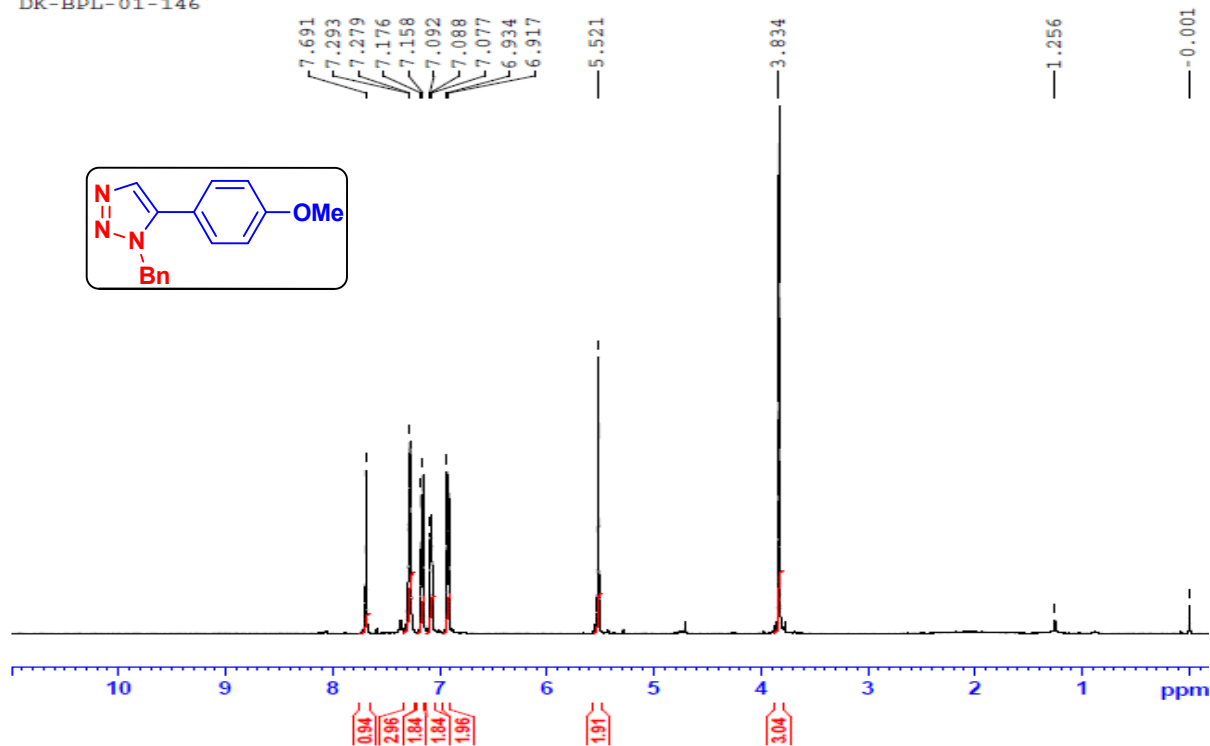

1-benzyl-5-(4-methoxyphenyl)-1H-1,2,3-triazole:

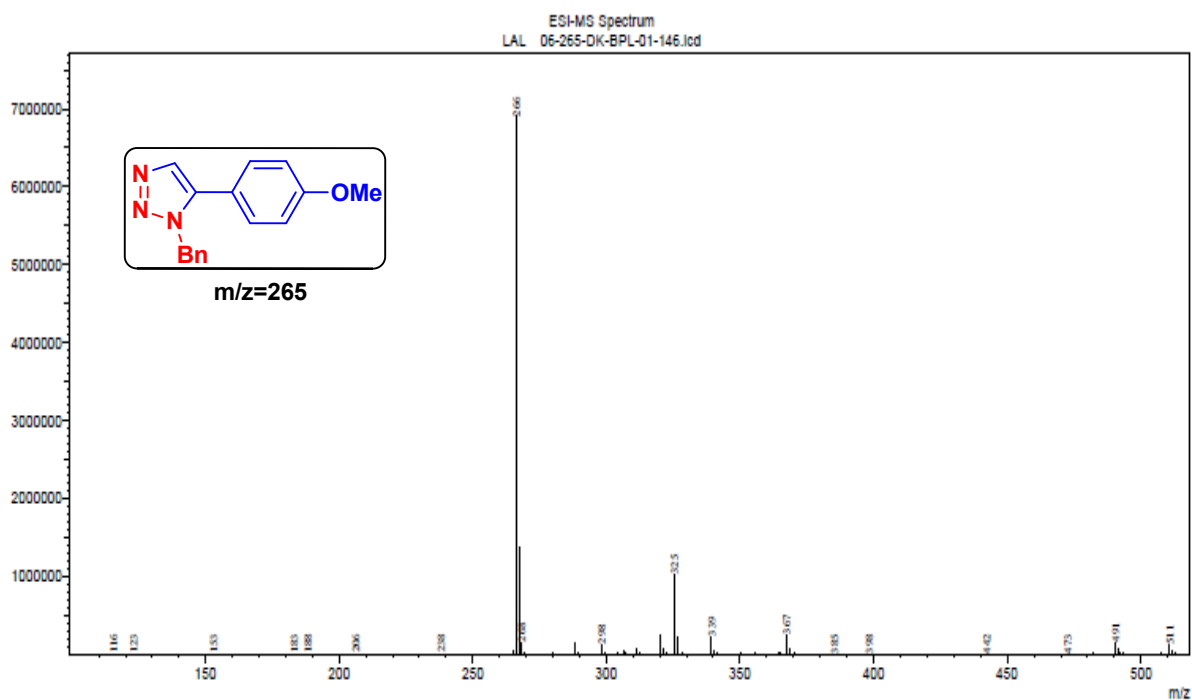

5-(4-methoxyphenyl)-1-phenyl-1H-1,2,3-triazol:

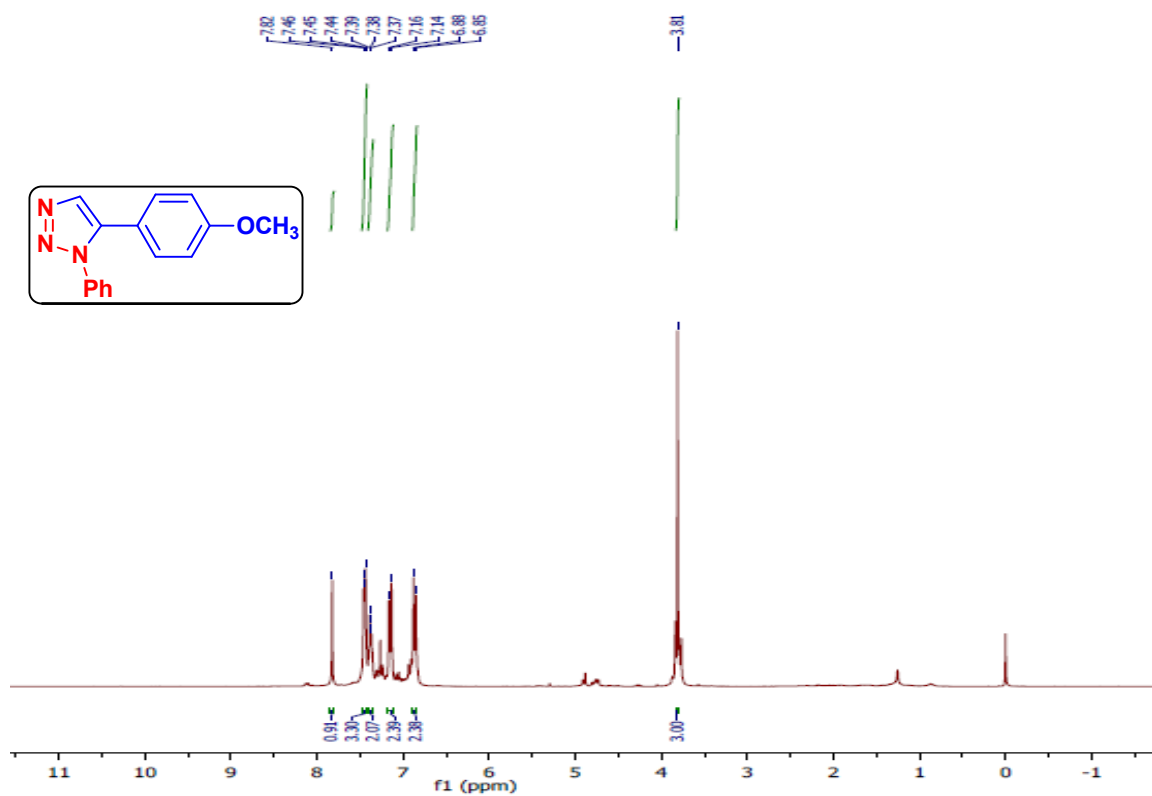

### 5-(4-methoxyphenyl)-1-phenyl-1H-1,2,3-triazol:

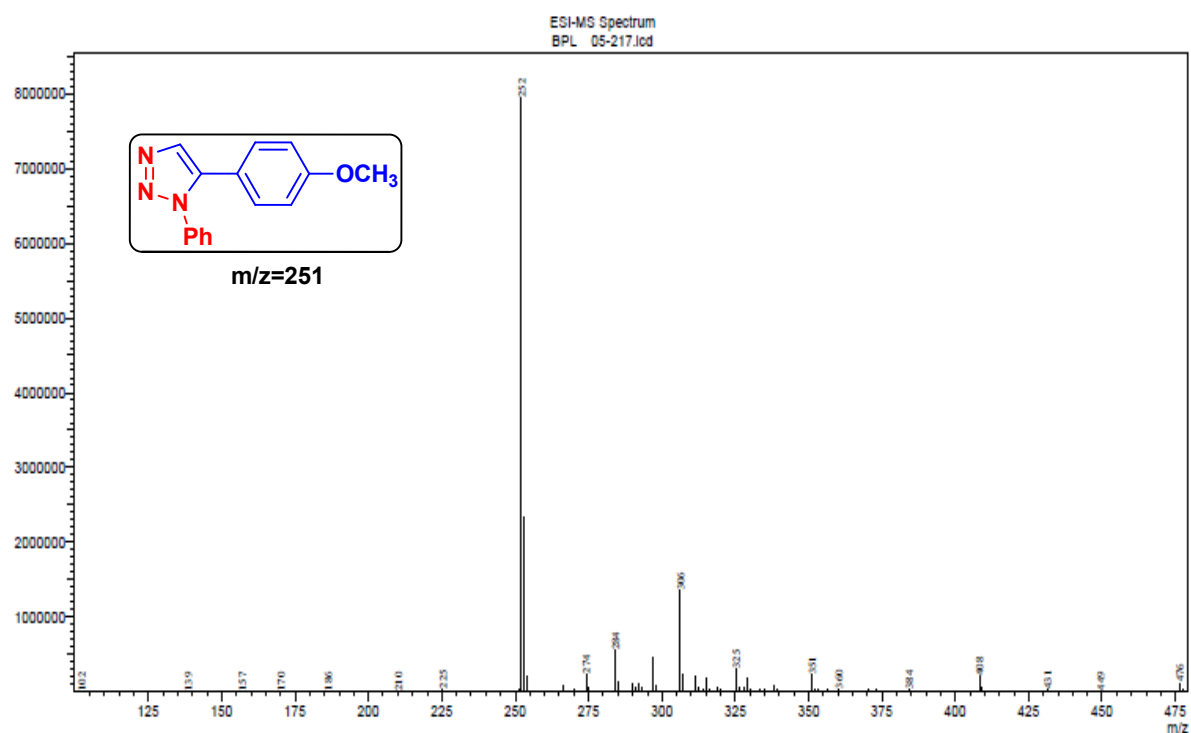

2-(1-benzyl-1H-1,2,3-triazol-5-yl)-6-methoxyphenol:

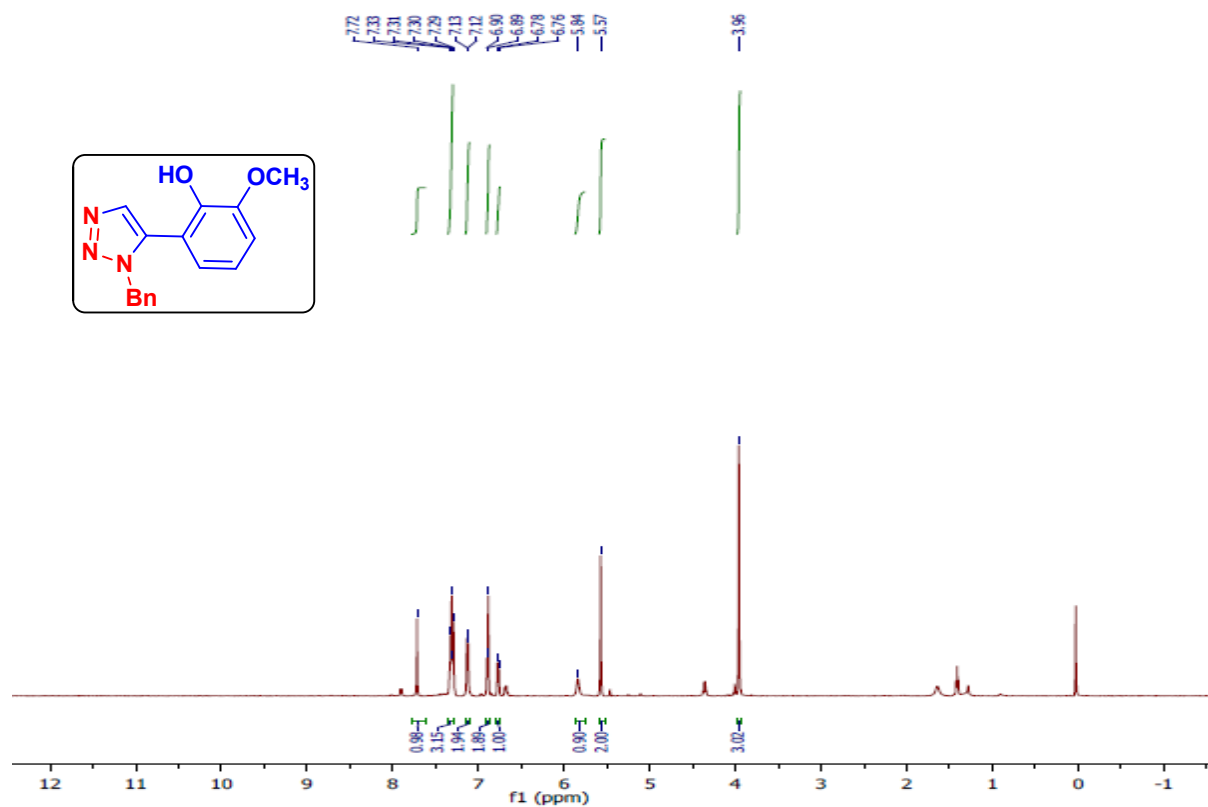

2-(1-benzyl-1H-1,2,3-triazol-5-yl)-6-methoxyphenol:

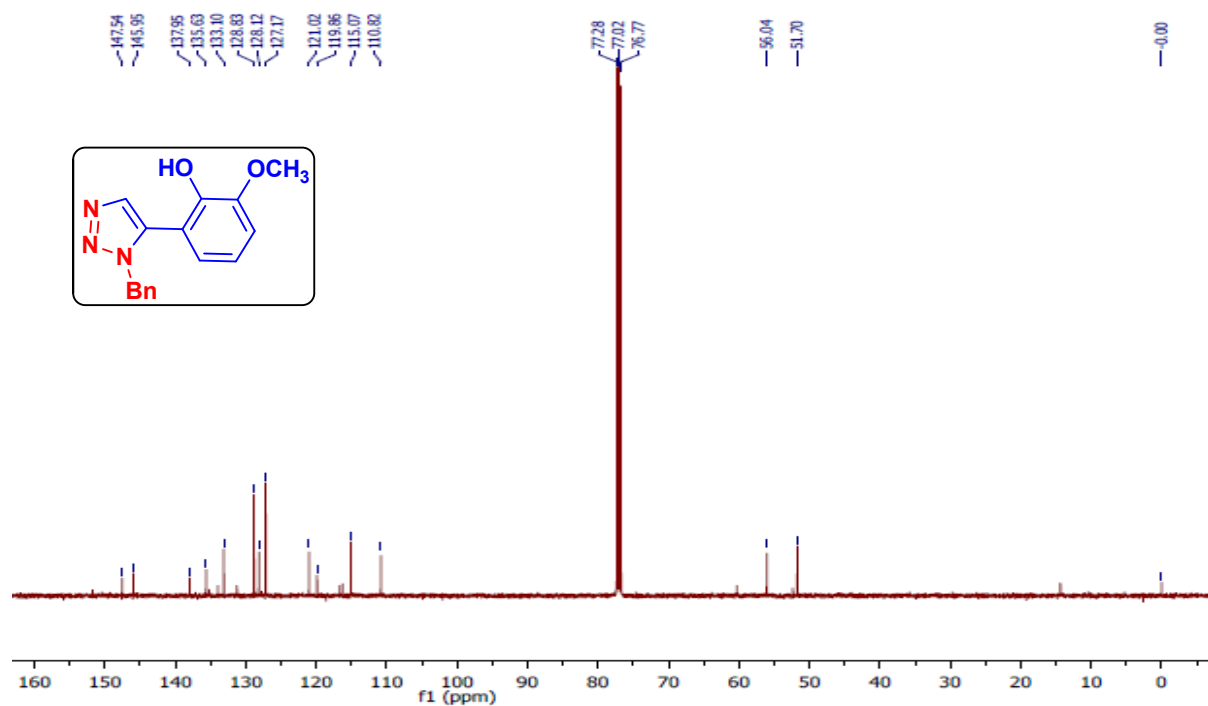

2-(1-benzyl-1H-1,2,3-triazol-5-yl)-6-methoxyphenol:

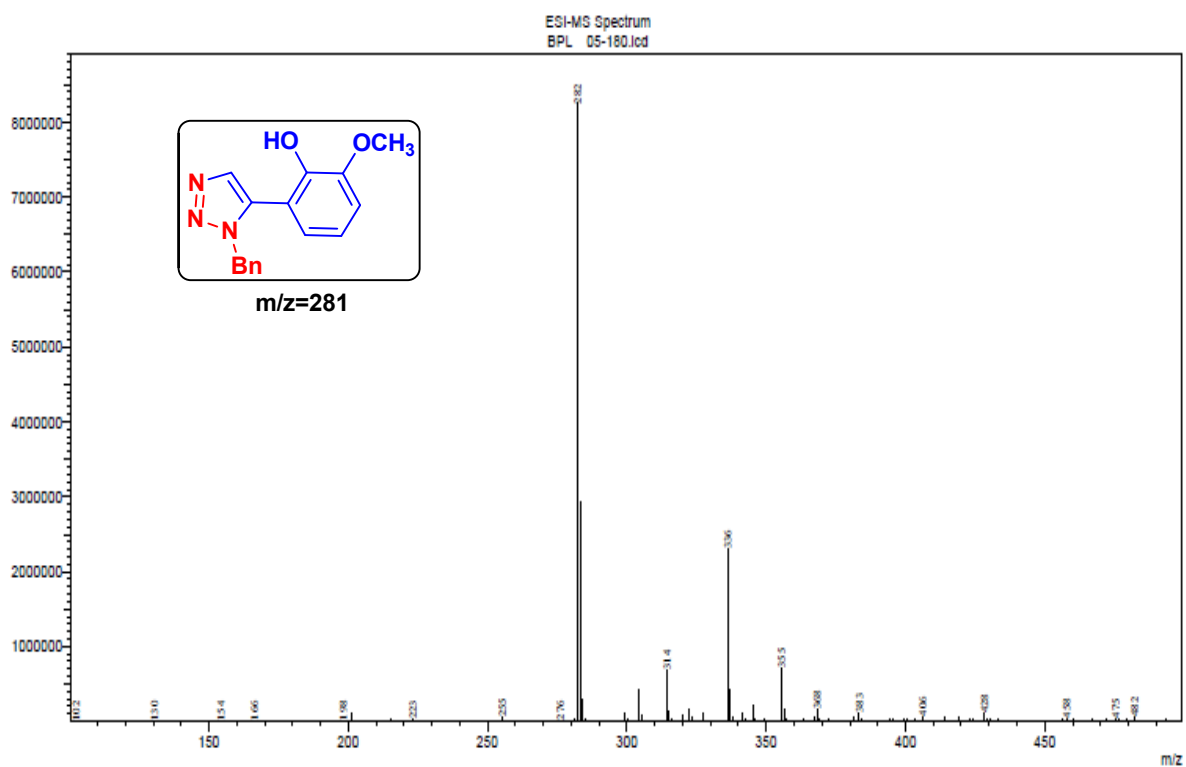

1-benzyl-5-(naphthalene-1-yl)-1H-1,2,3-triazole:

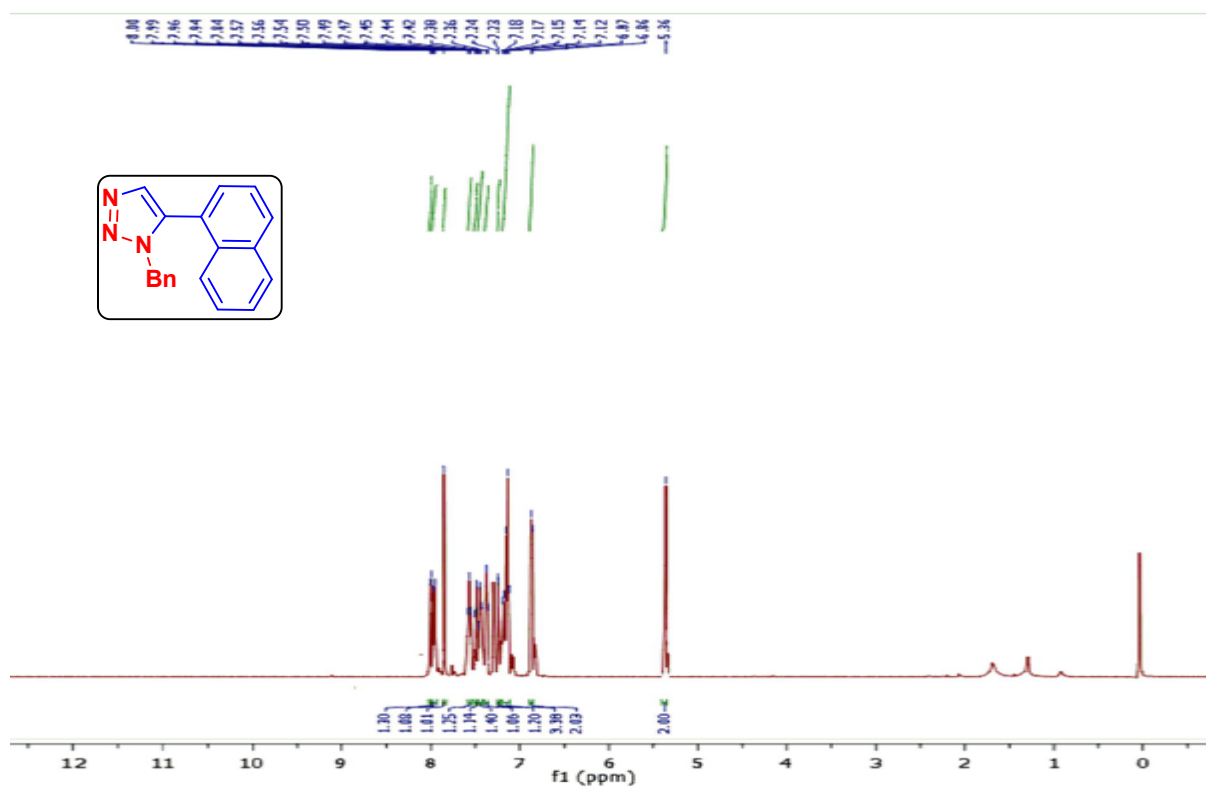

1-benzyl-5-(naphthalene-1-yl)-1H-1,2,3-triazole:

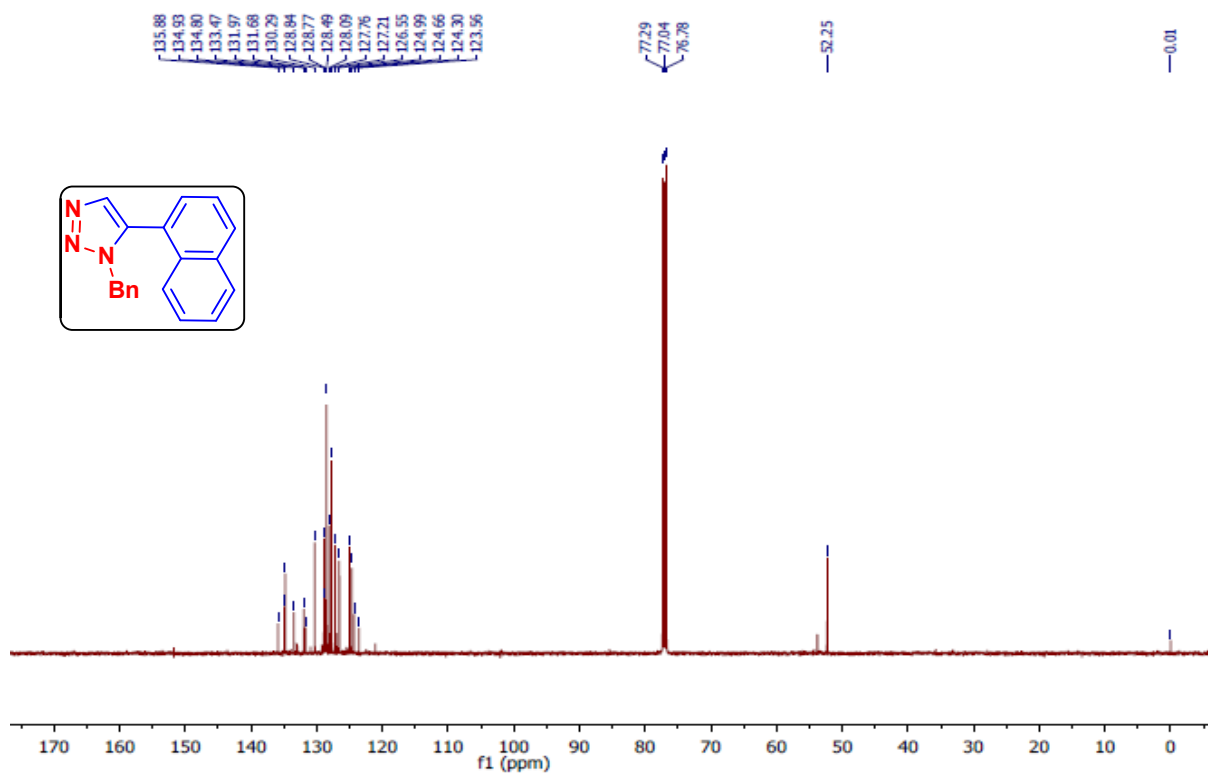

**1-benzyl-5-(naphthalene-1-yl)-1H-1,2,3-triazole:**

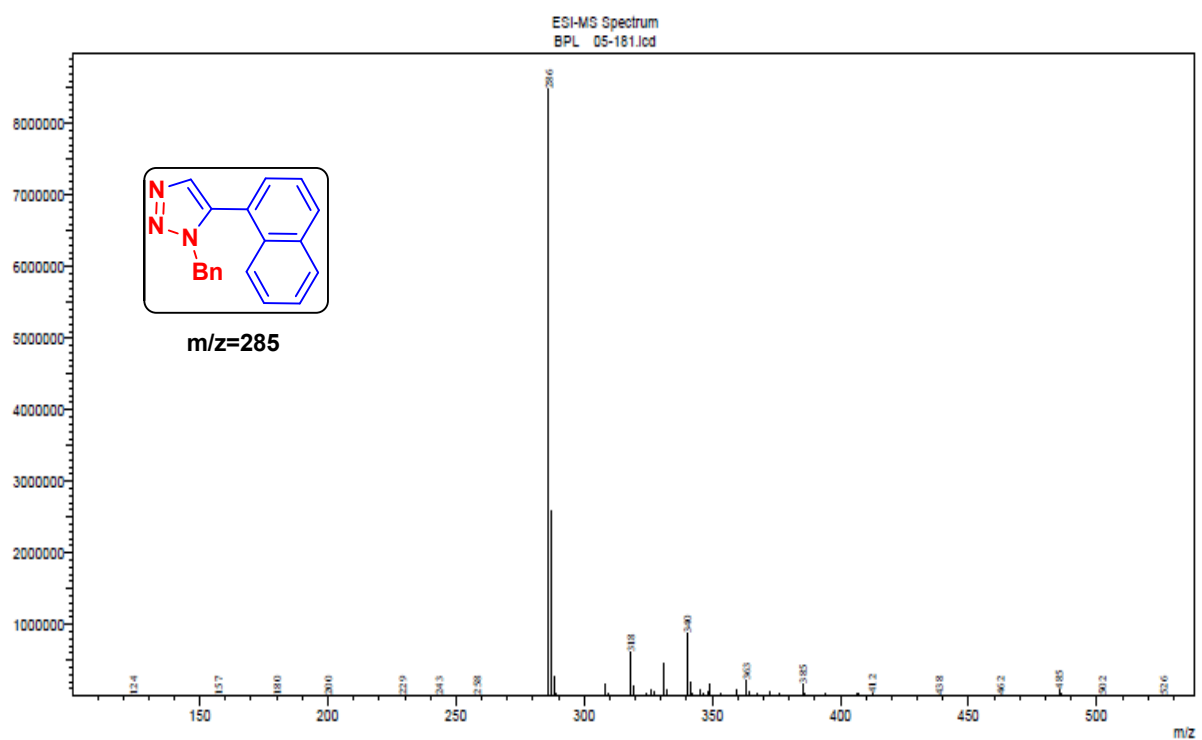

**1-benzyl-5-phenyl -1H-1,2,3-triazole :**



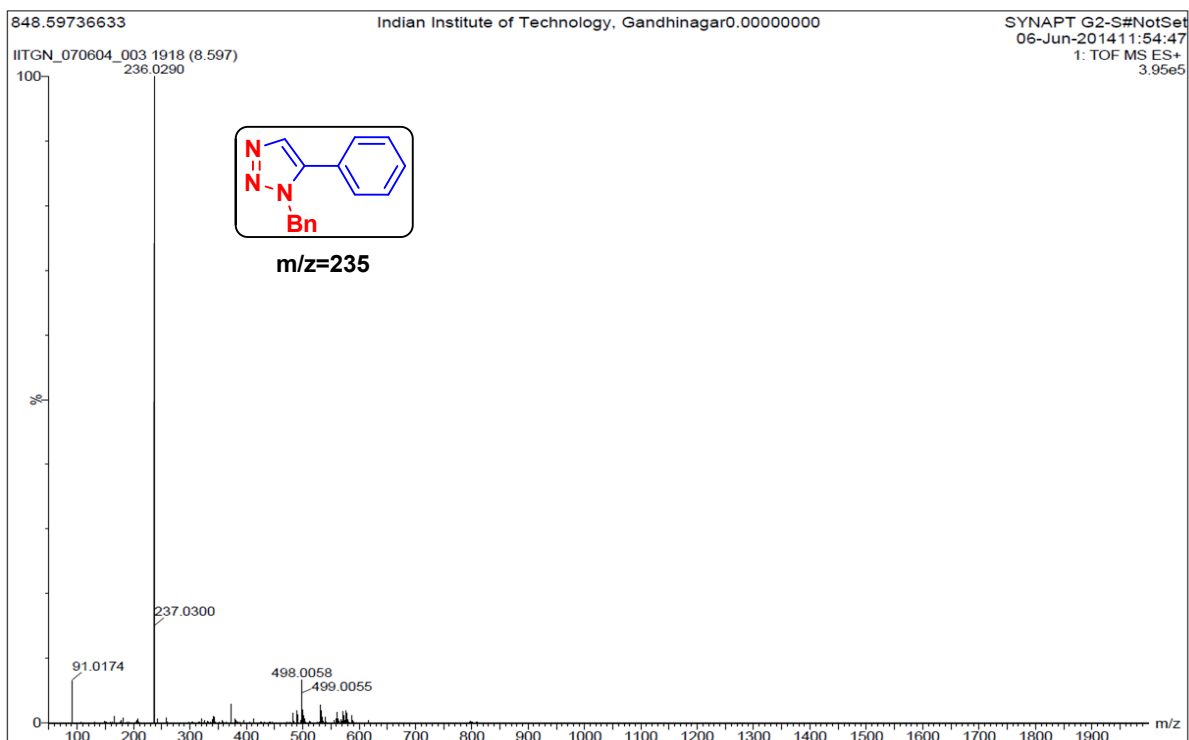

**1-benzyl-5-(4-chlorophenyl)-1H-1,2,3-triazole:**

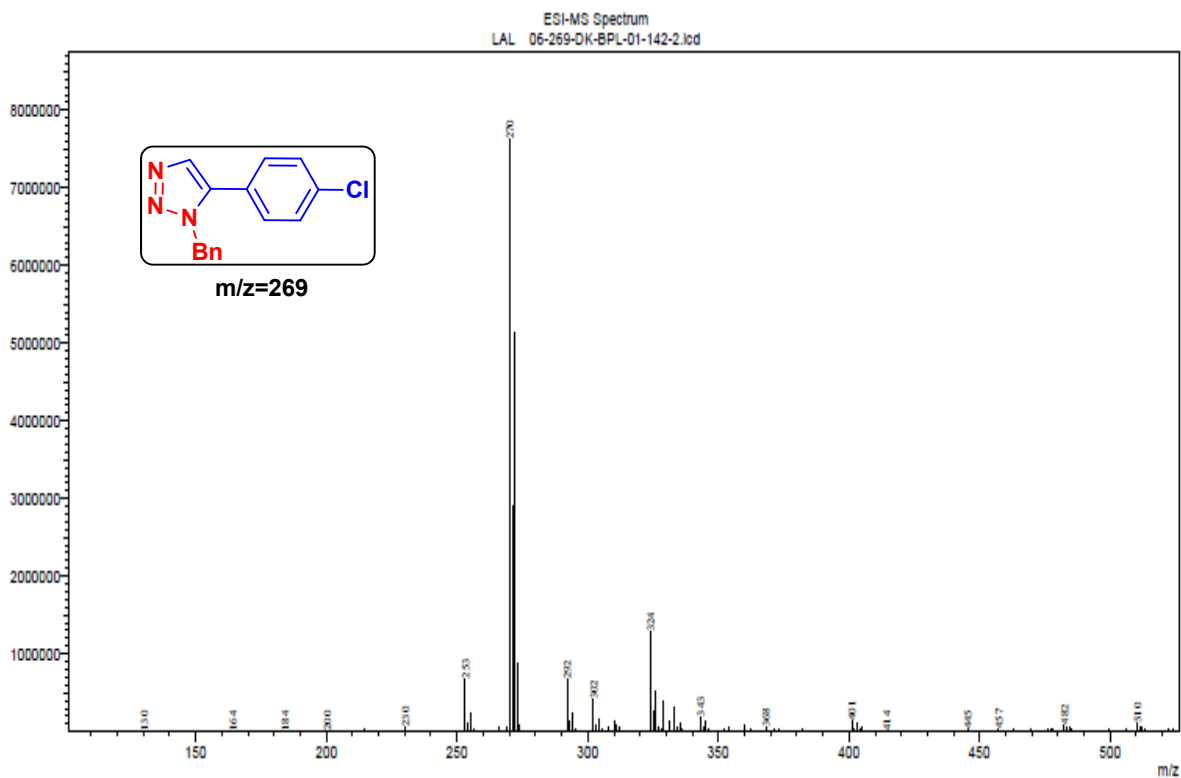

**5-(4-chlorophenyl)-1-phenyl-1H-1,2,3-triazole:**

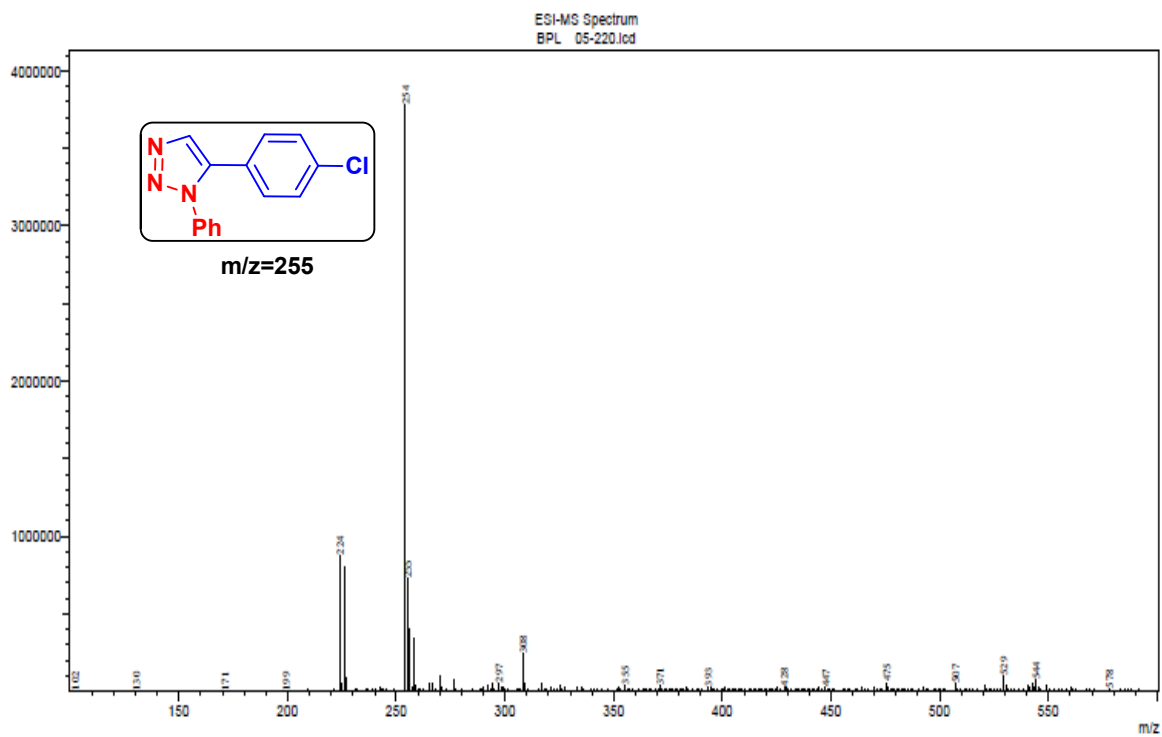

**1-benzyl-5-(furan-2-yl)-1H-1,2,3-triazole:**

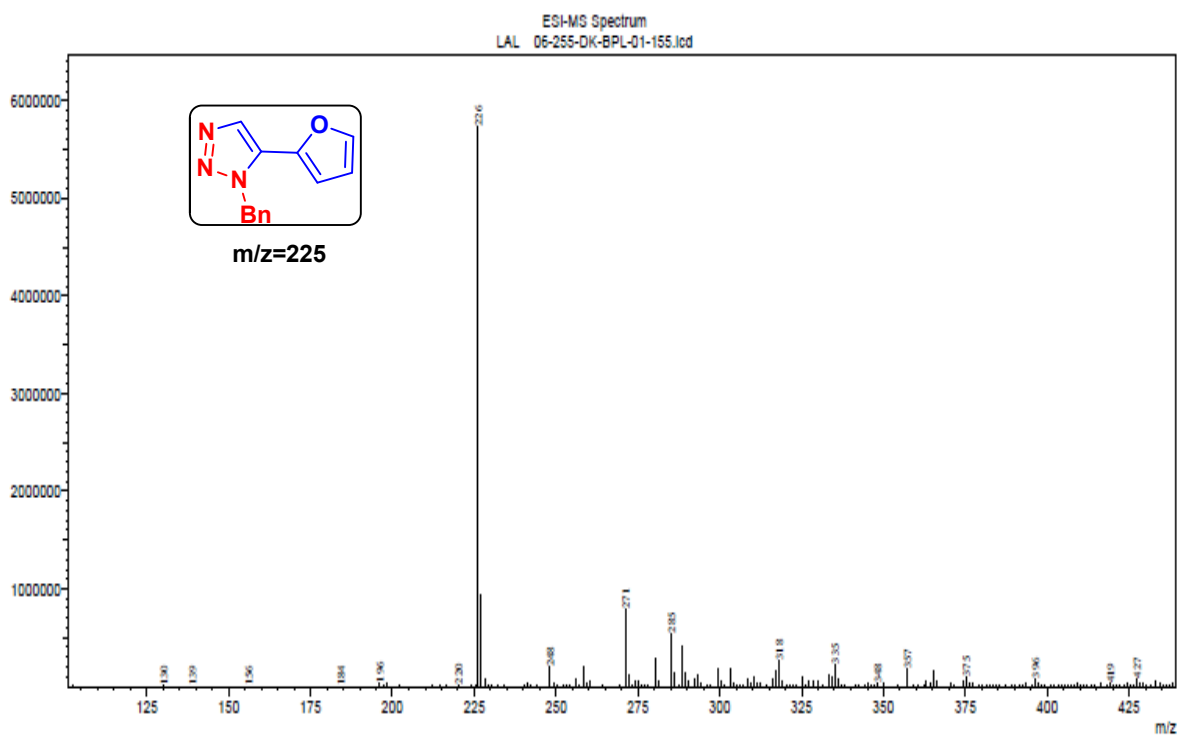

**1-benzyl-5-(3-nitrophenyl)-1H-1,2,3-triazole:**

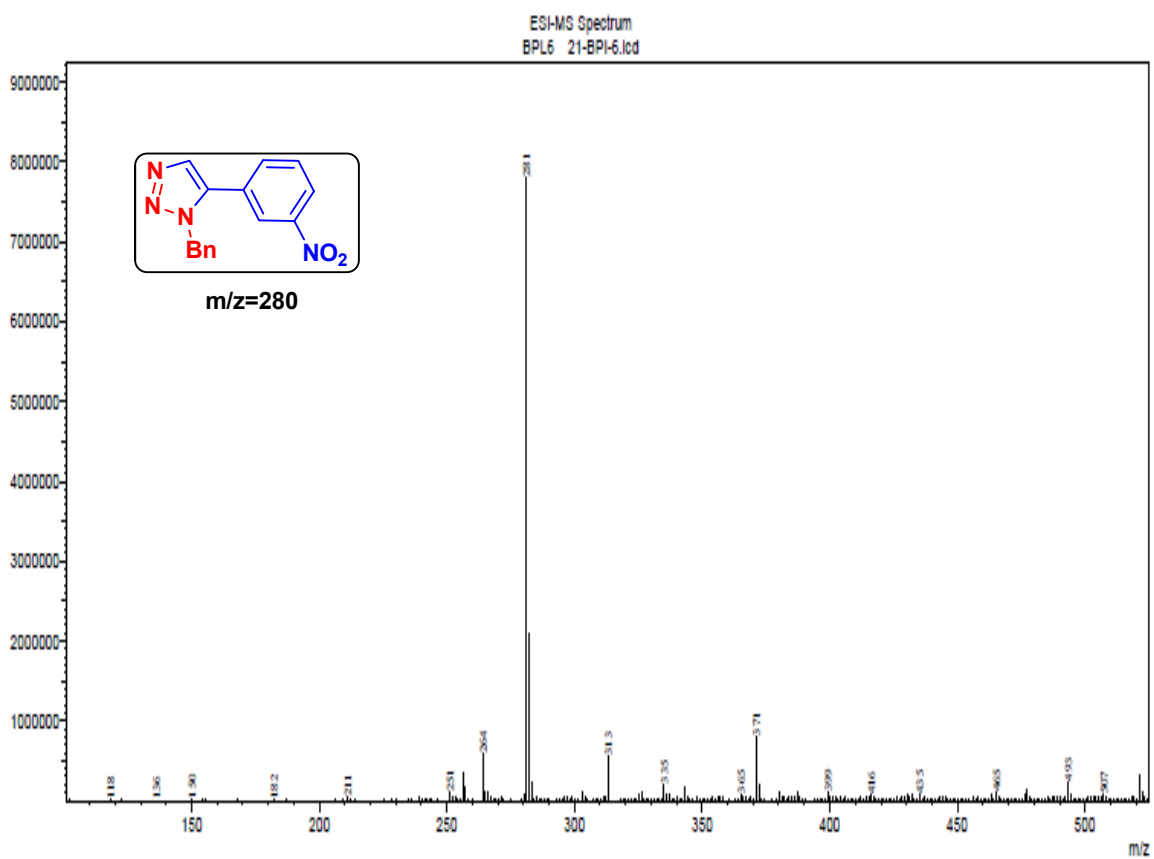

**1-benzyl-5-(4-bromophenyl)-1H-1,2,3-triazole:**

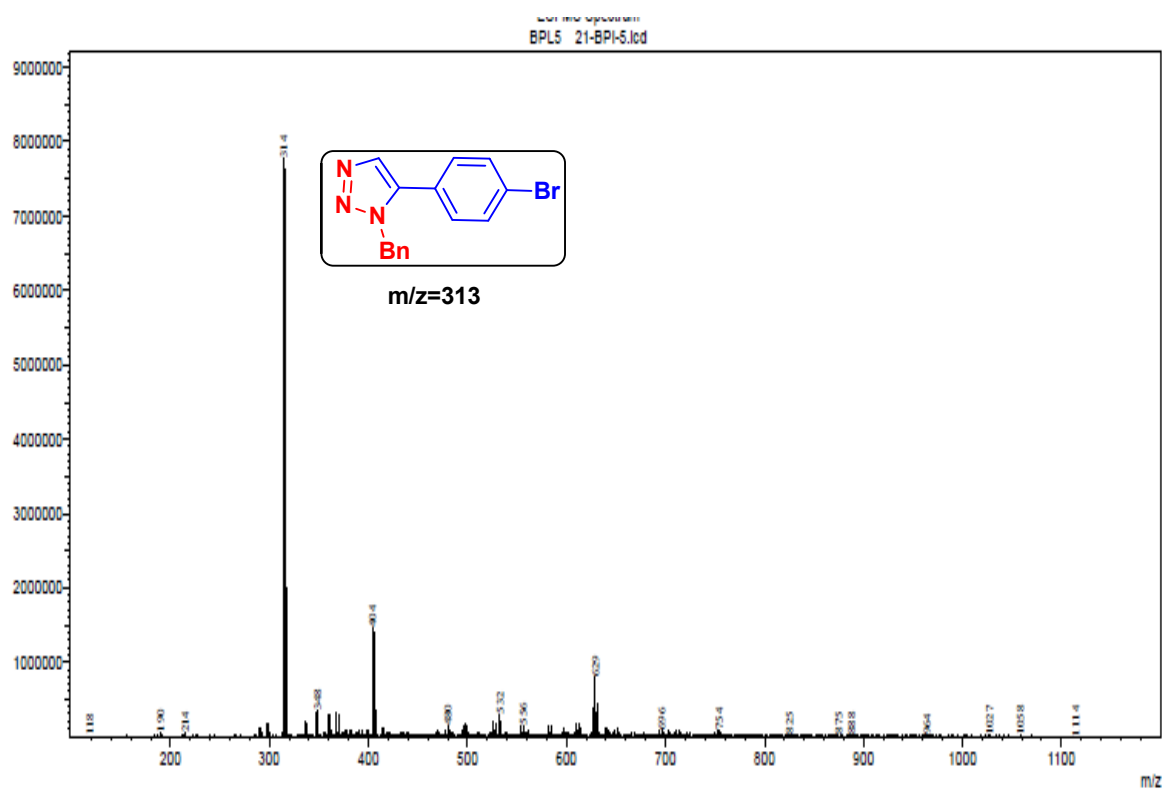

**5-(naphthalene-1-yl)-1phenyl-1H-1,2,3-Triazole:**

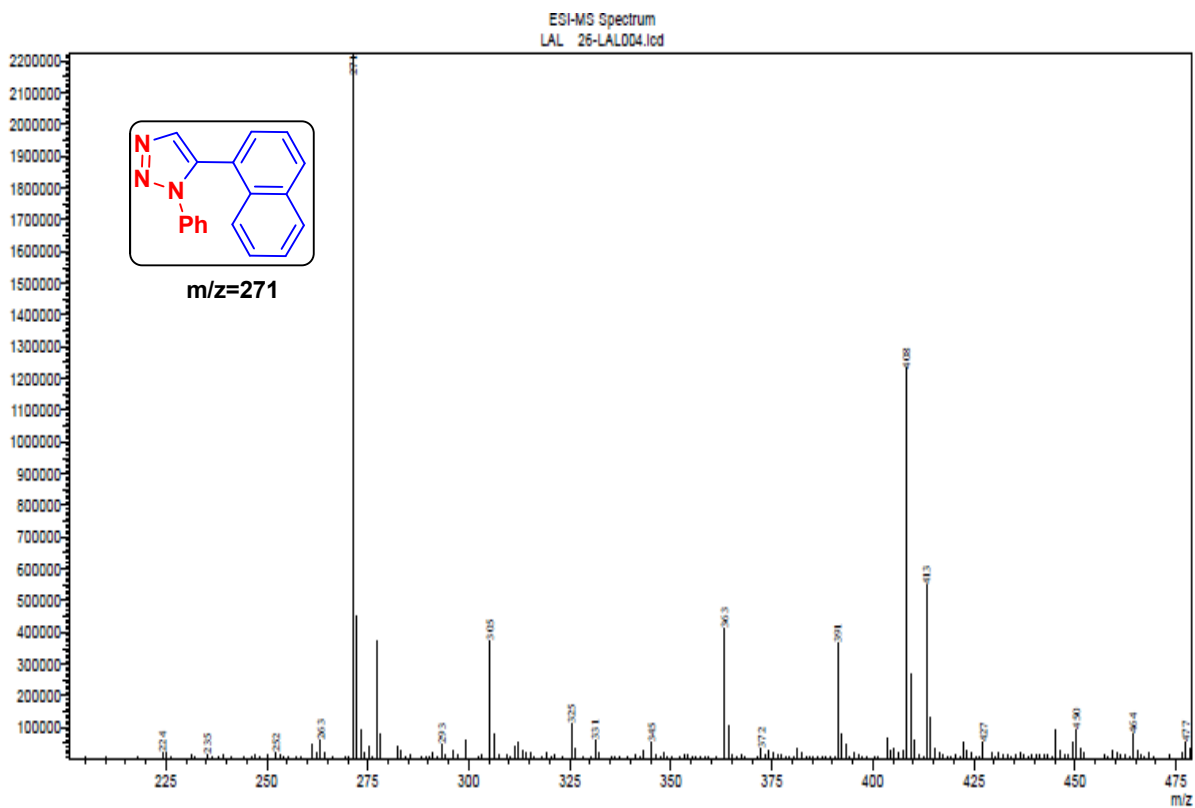

**4-(4-chlorophenyl)-1H-1,2,3-triazole:**

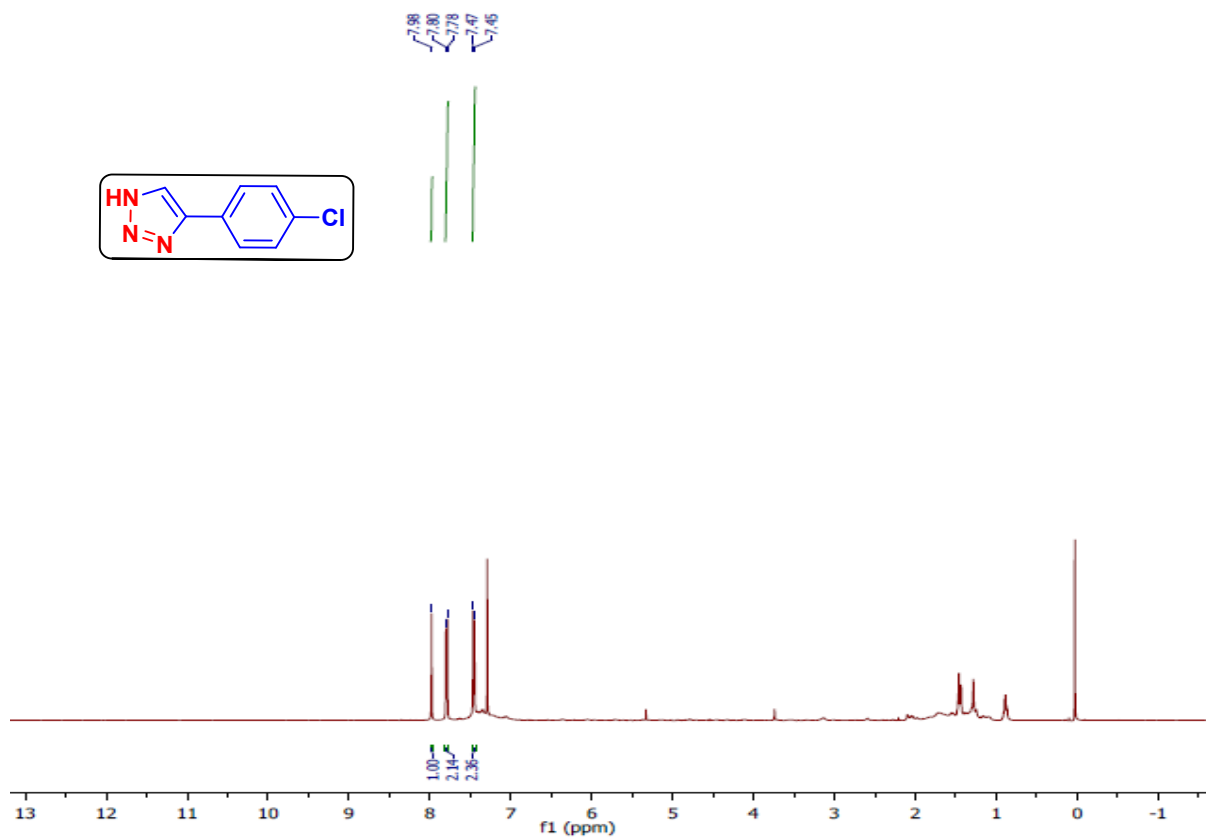

**2-methoxy-6-(1H-1,2,3-triazol-4-yl) phenol:**

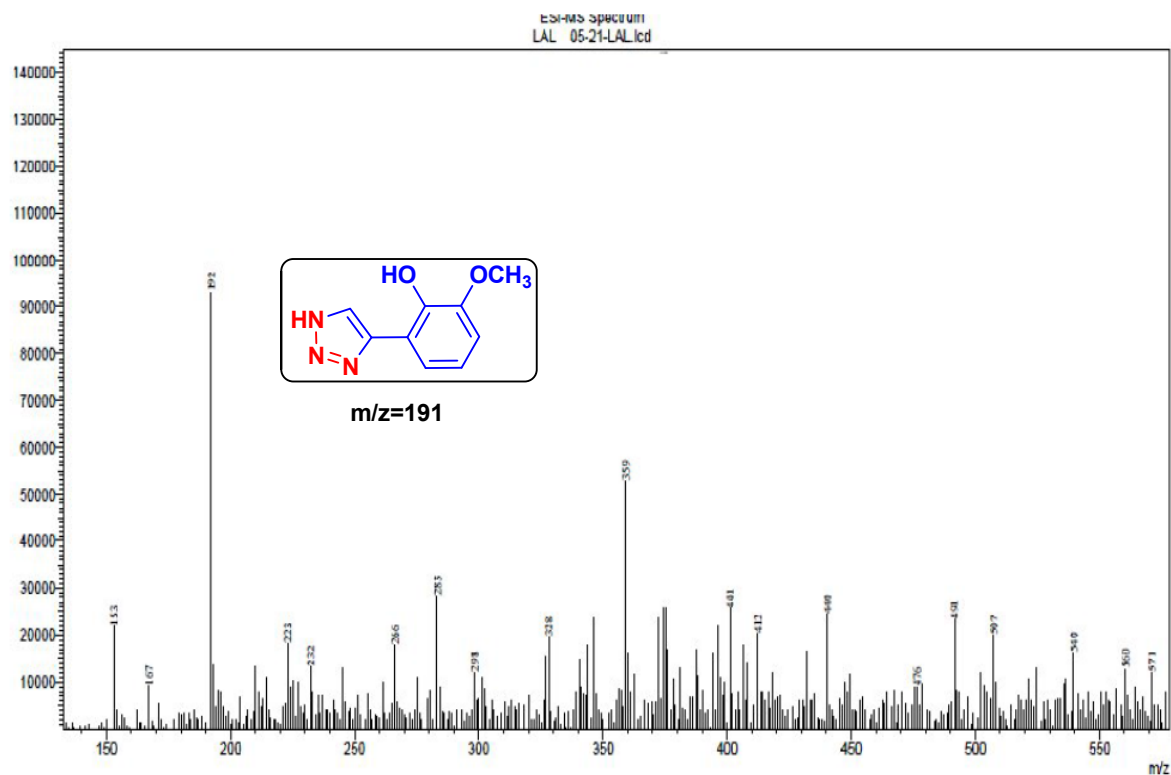

**<sup>1</sup>H NMR: (1-benzyl-5-(4-nitrophenyl)-1H-1,2,3-triazol-4-yl)(phenyl)methanone:**

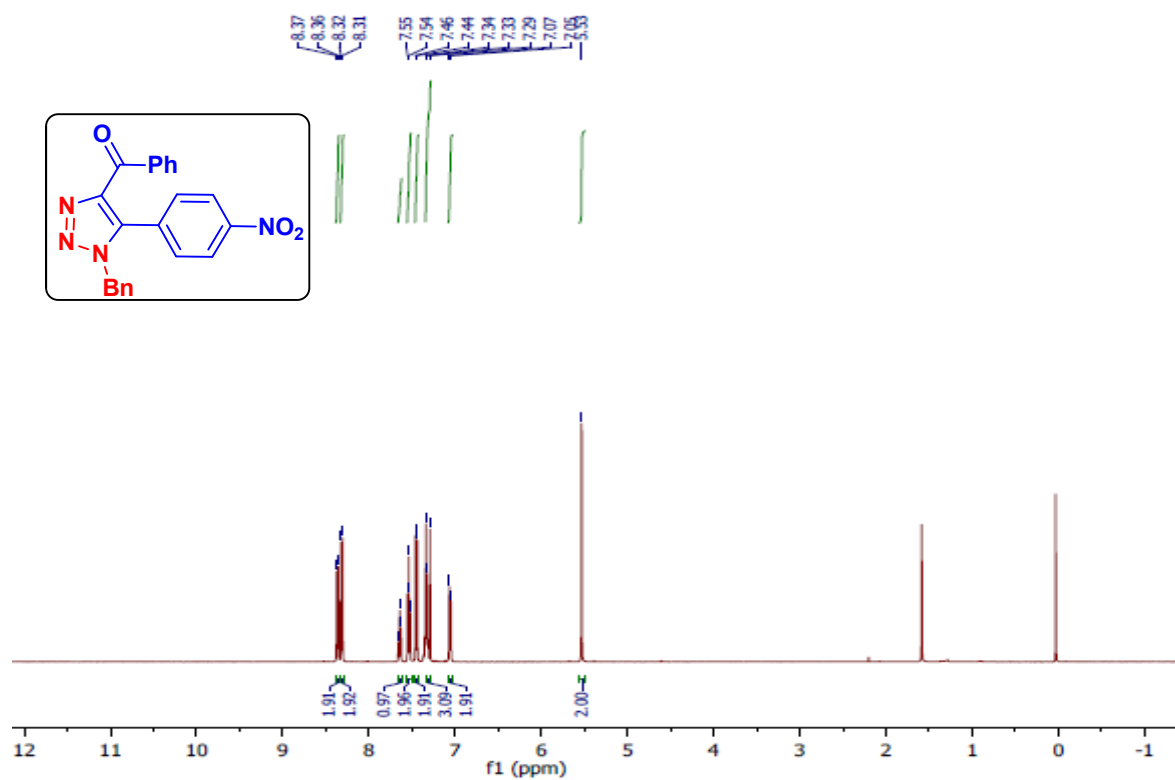

**<sup>1</sup>H NMR: (1-benzyl-5-(4-nitrophenyl)-1H-1,2,3-triazol-4-yl)(phenyl)methanone:**

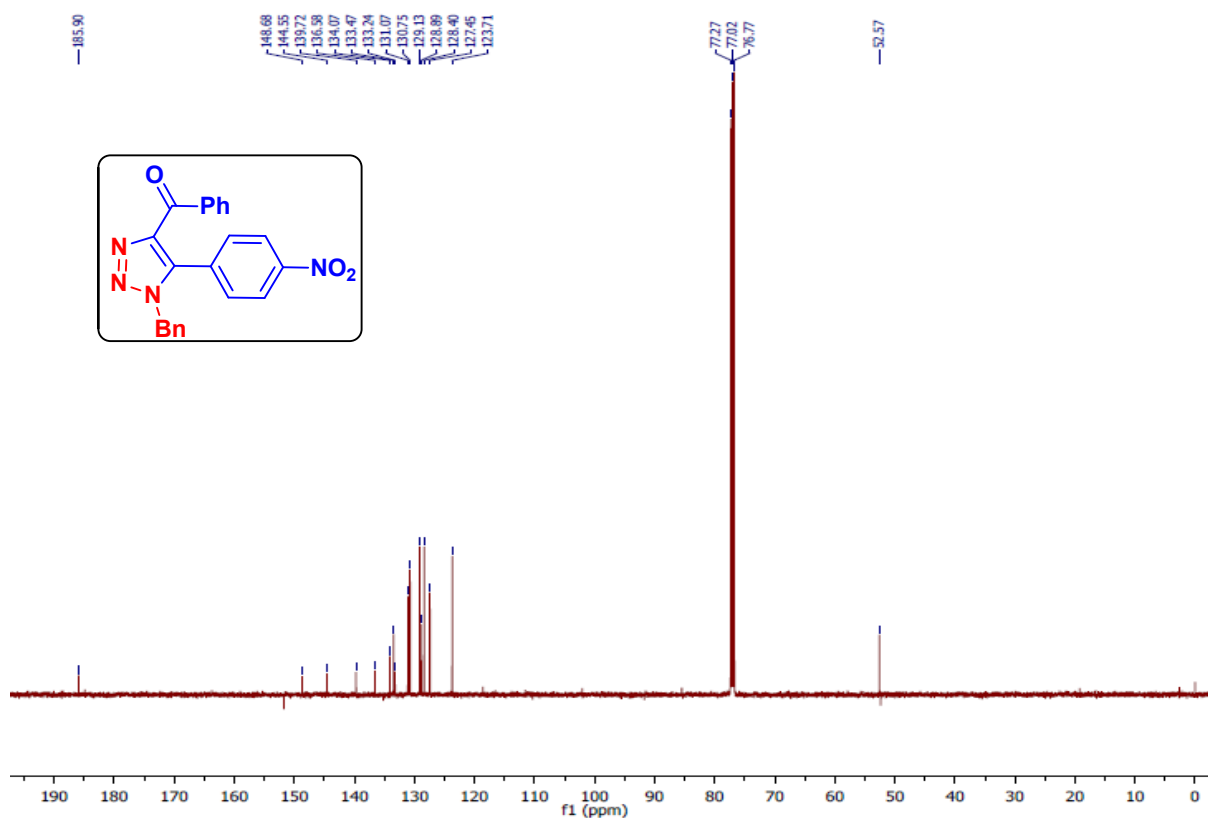

**<sup>1</sup>H NMR: (1-benzyl-5-(4-nitrophenyl)-1H-1,2,3-triazol-4-yl)(phenyl)methanone:**

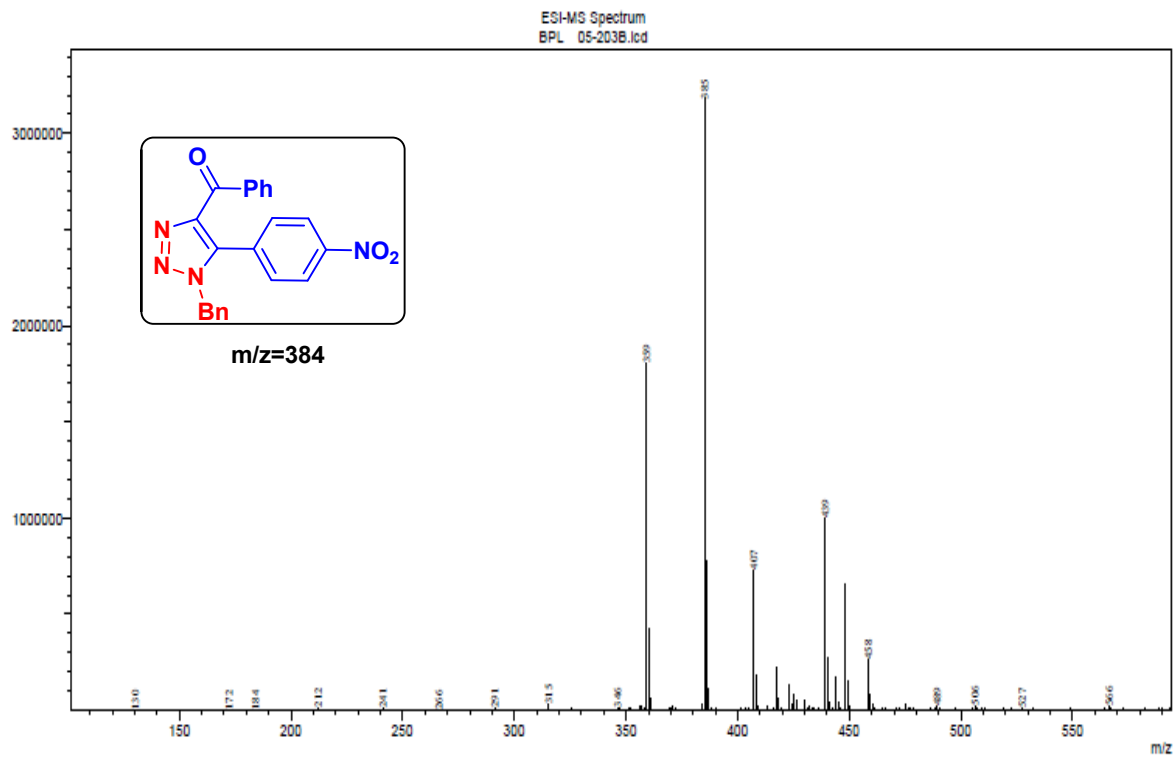

**<sup>1</sup>H NMR1-(1-benzyl-5-(3,4-dimethoxyphenyl)-1H-1,2,3-triazol-4-yl)ethanone :**

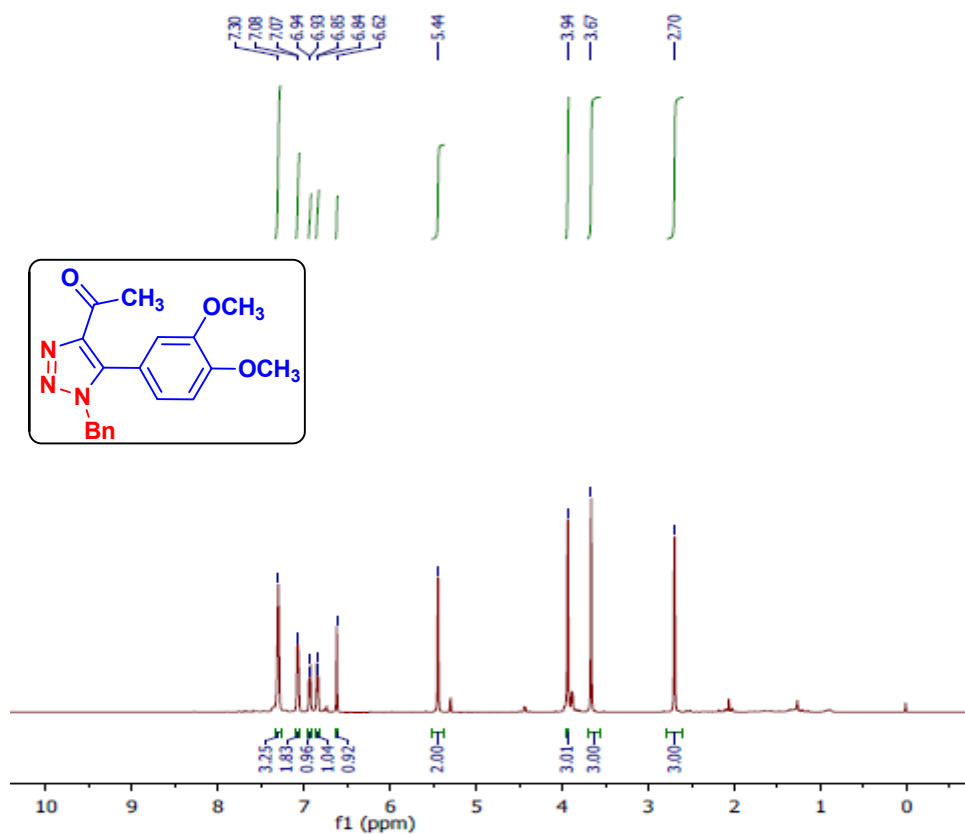

**<sup>1</sup>H NMR1-(1-benzyl-5-(3,4-dimethoxyphenyl)-1H-1,2,3-triazol-4-yl)ethanone :**

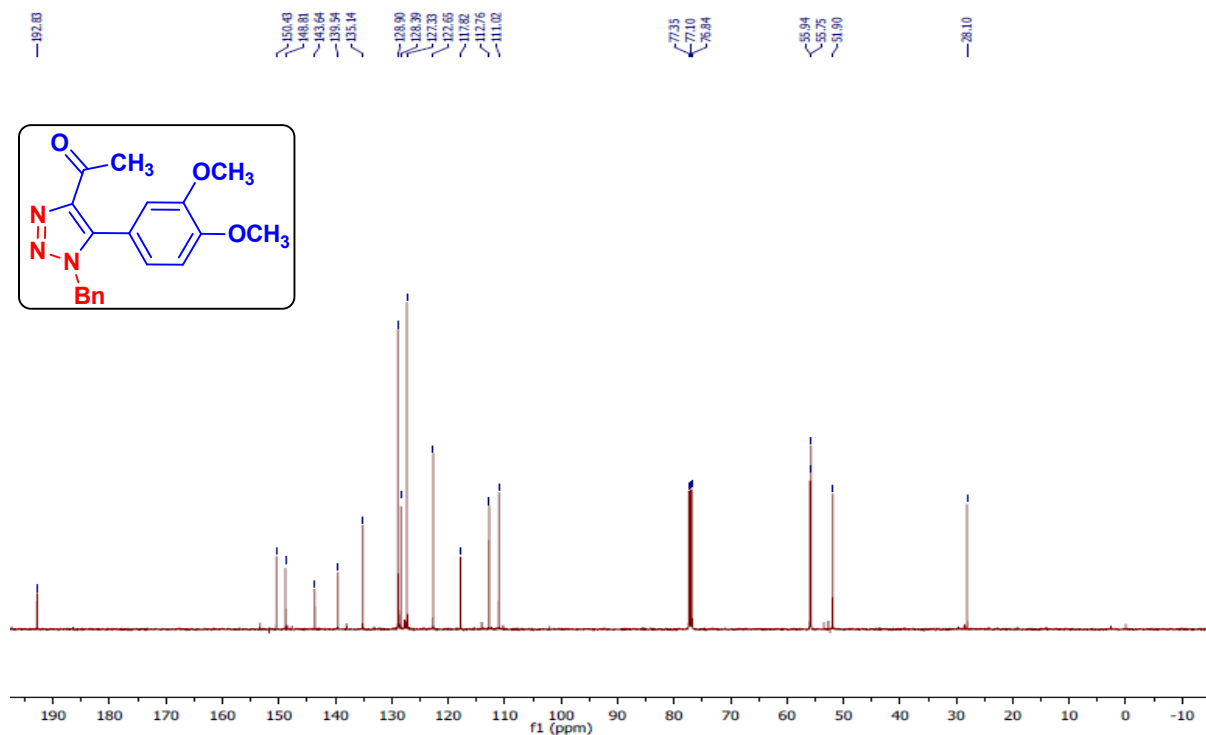

**<sup>13</sup>C NMR1-(1-benzyl-5-(3,4-dimethoxyphenyl)-1H-1,2,3-triazol-4-yl)ethanone :**

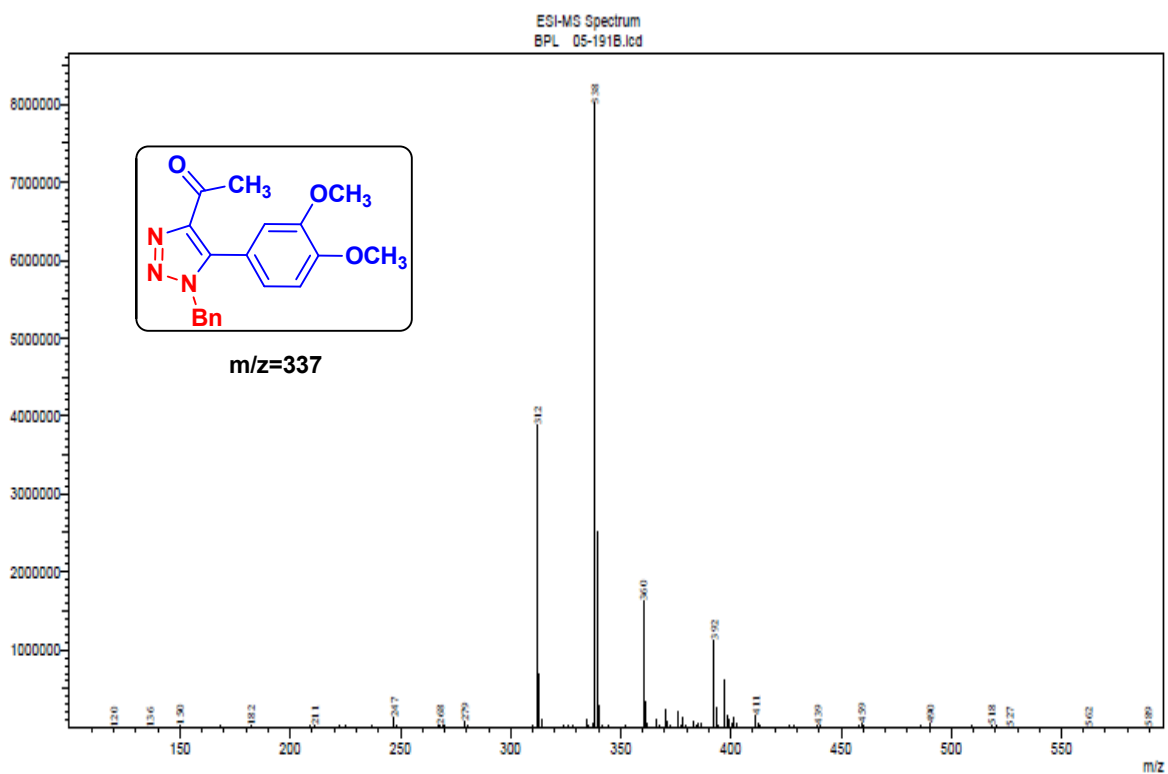

**1-(1-benzyl-5-(4-(dimethylamino)phenyl)-1H-1,2,3-triazol-4-yl)ethanone:**

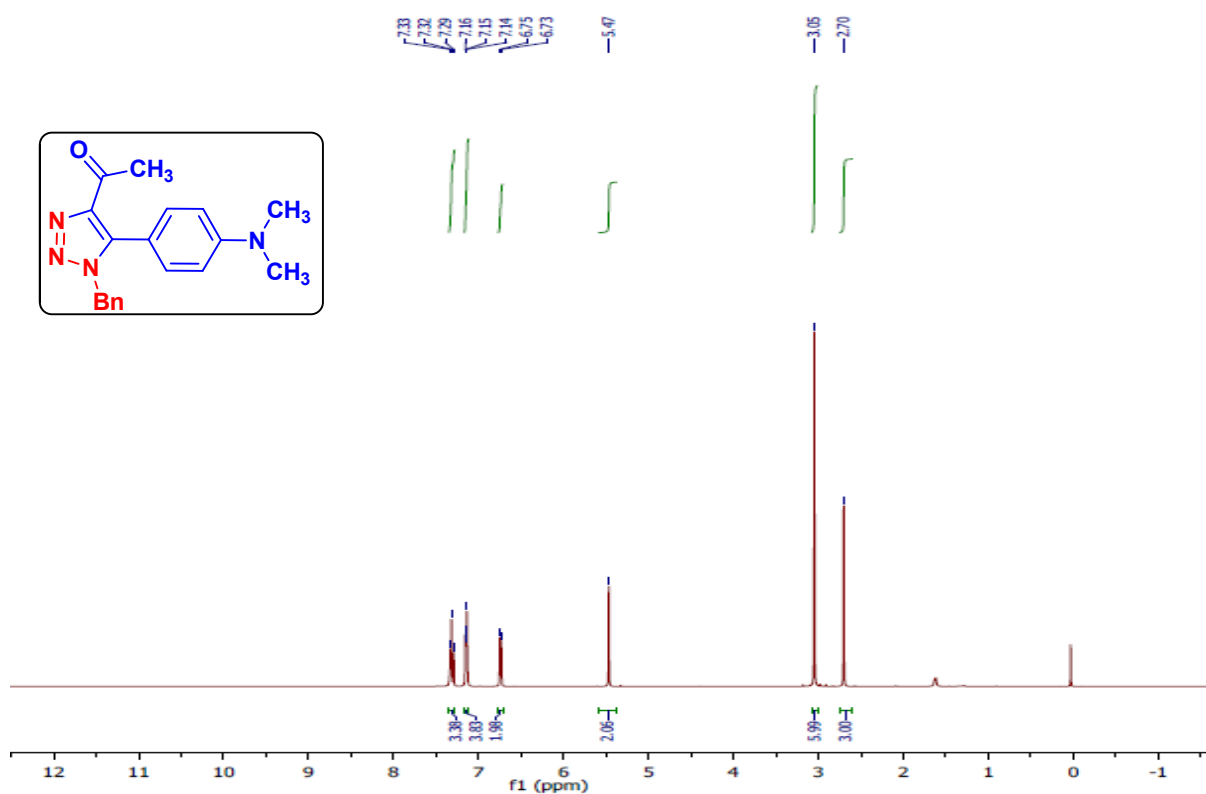

**1-(1-benzyl-5-(4-(dimethylamino)phenyl)-1H-1,2,3-triazol-4-yl)ethanone:**



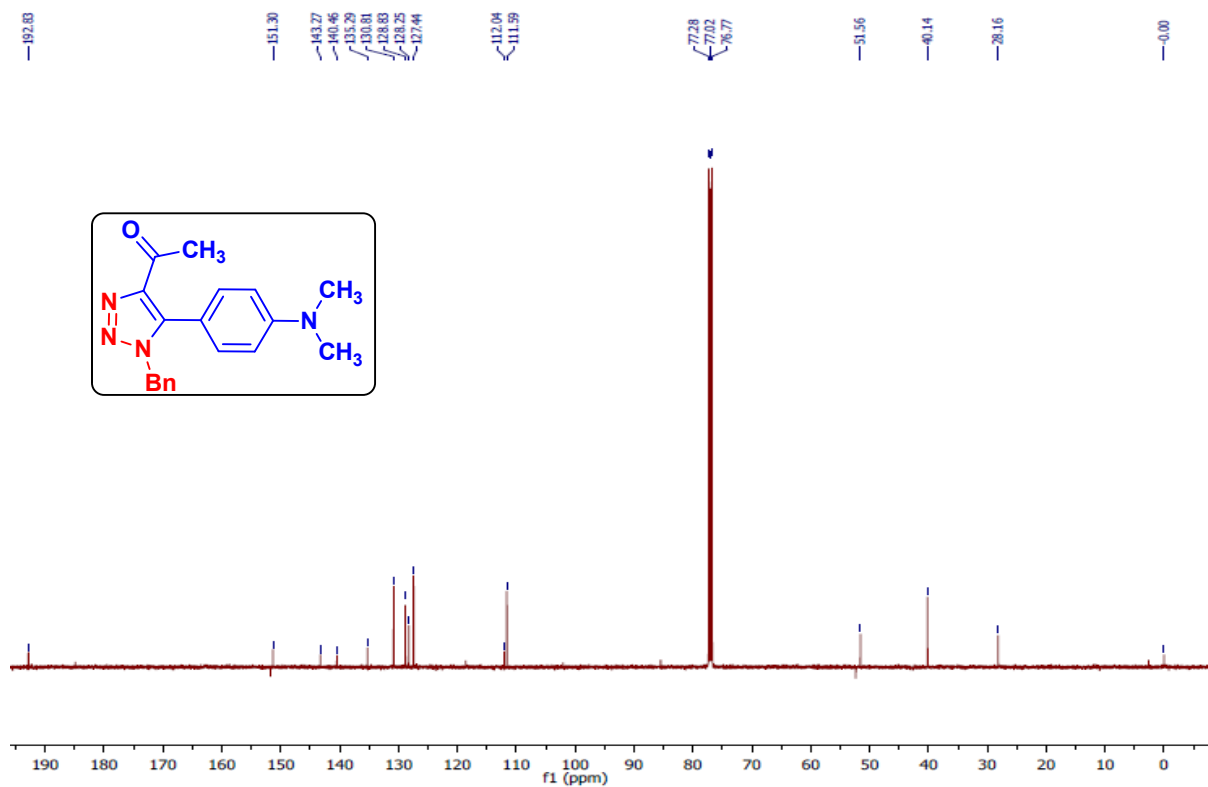

**1-(1-benzyl-5-(4-(dimethylamino)phenyl)-1H-1,2,3-triazol-4-yl)ethanone:**

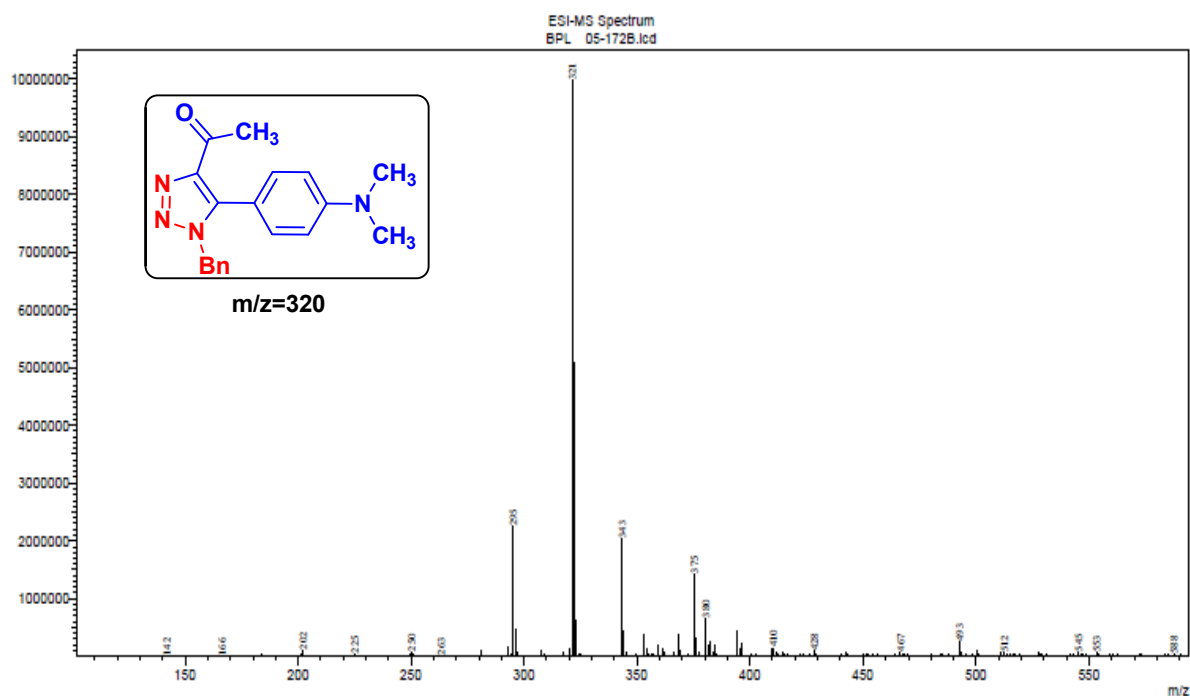

**1-(1-benzyl-5-(4-bromophenyl)-1H-1,2,3-triazol-4-yl)ethanone:**

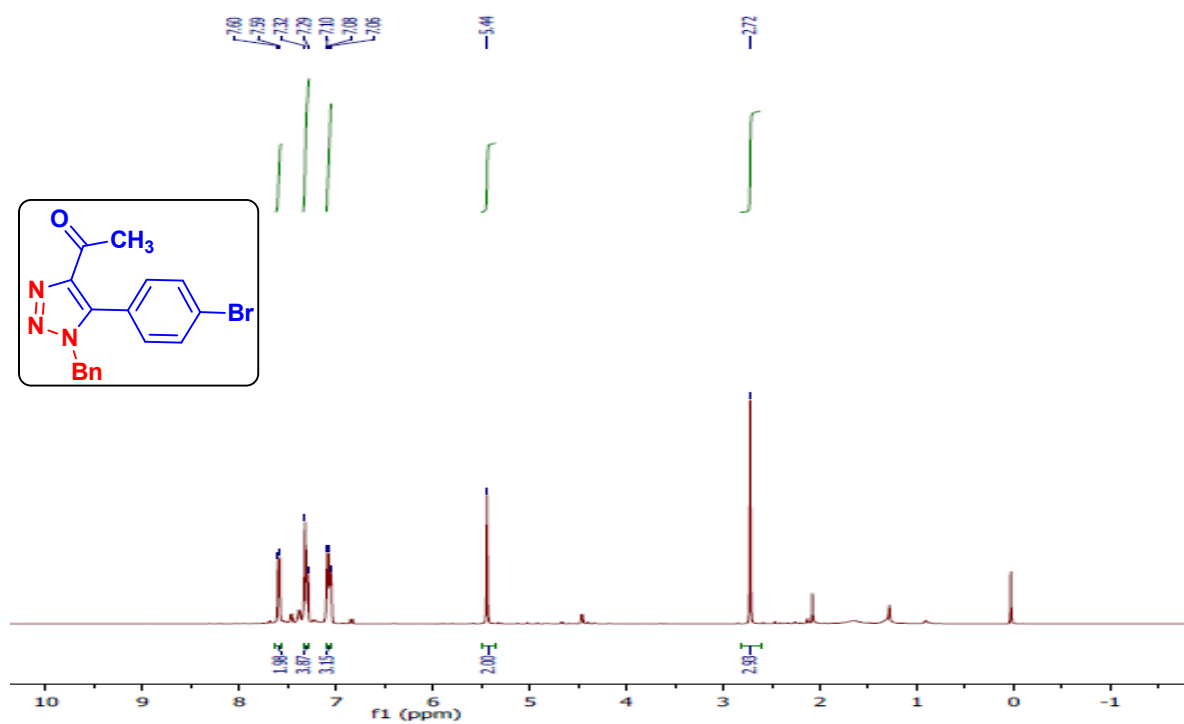

**1-(1-benzyl-5-(4-bromophenyl)-1H-1,2,3-triazol-4-yl)ethanone:**

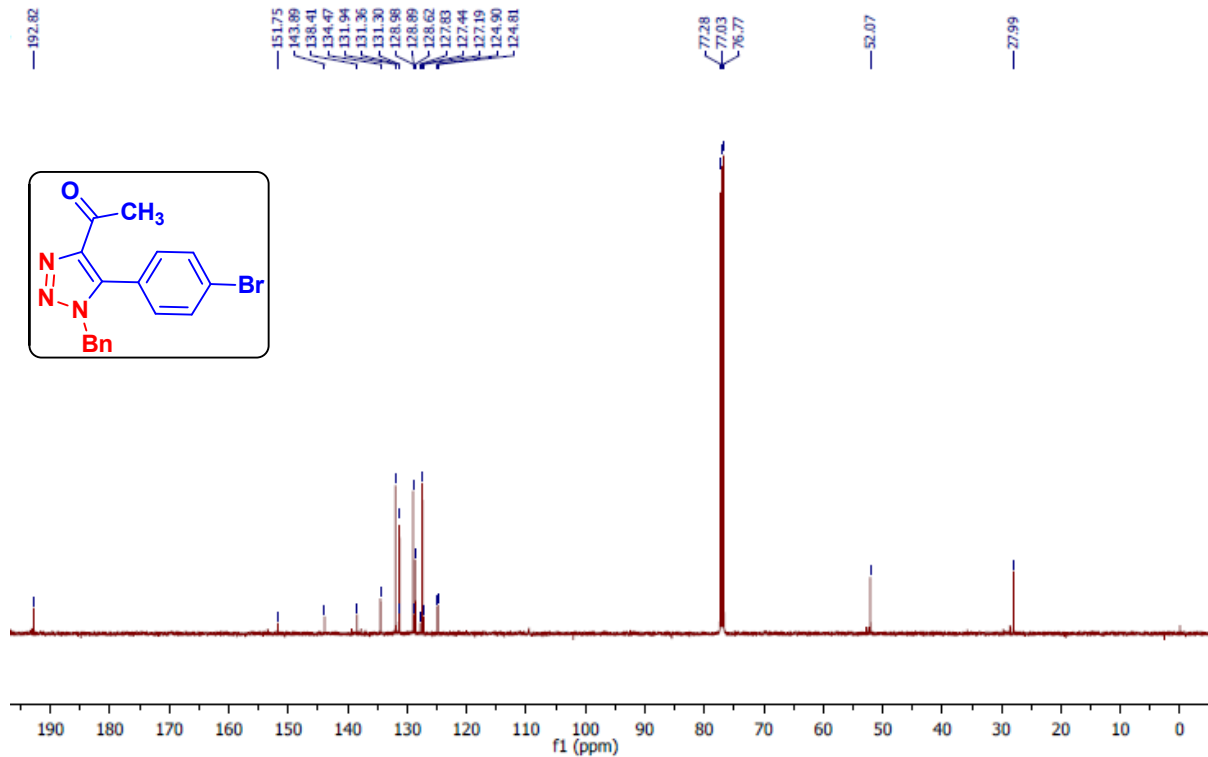

**1-(1-benzyl-5-(4-bromophenyl)-1H-1,2,3-triazol-4-yl)ethanone:**

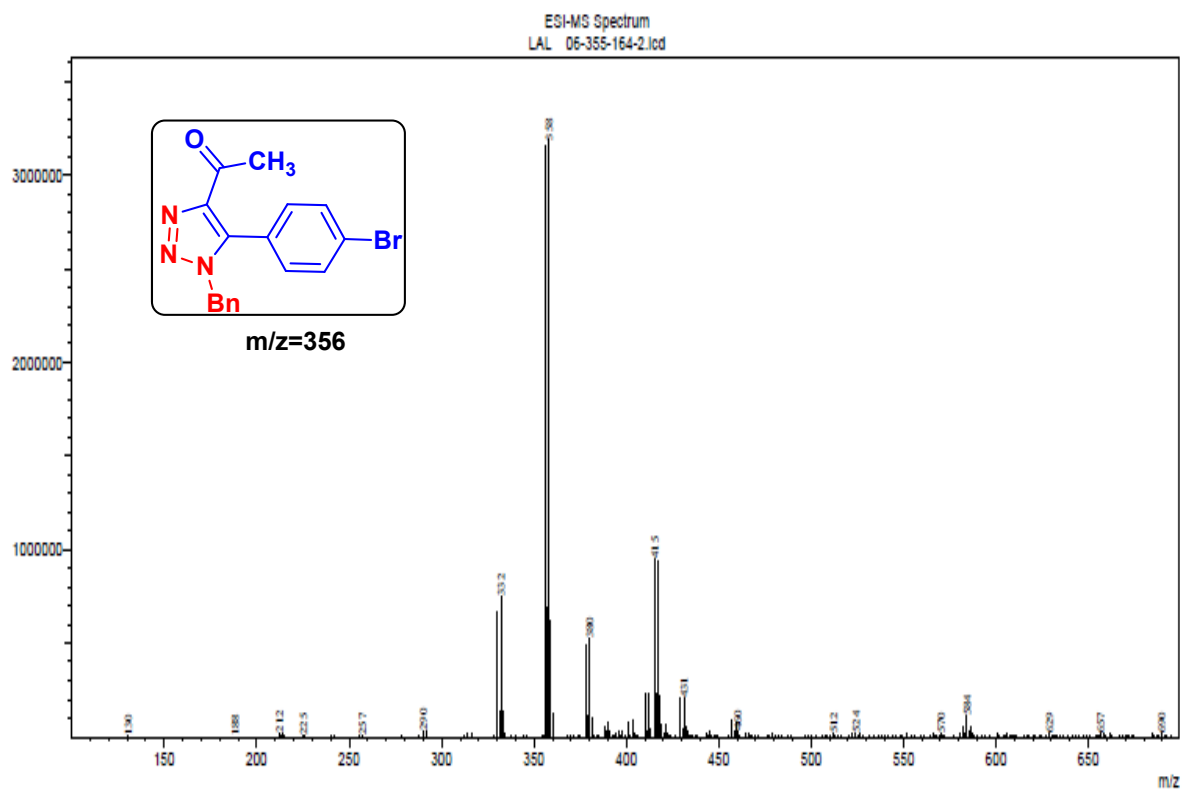

**1-(1-benzyl-5-(4-chlorophenyl)-1H-1,2,3-triazol-4-yl)ethanone:**

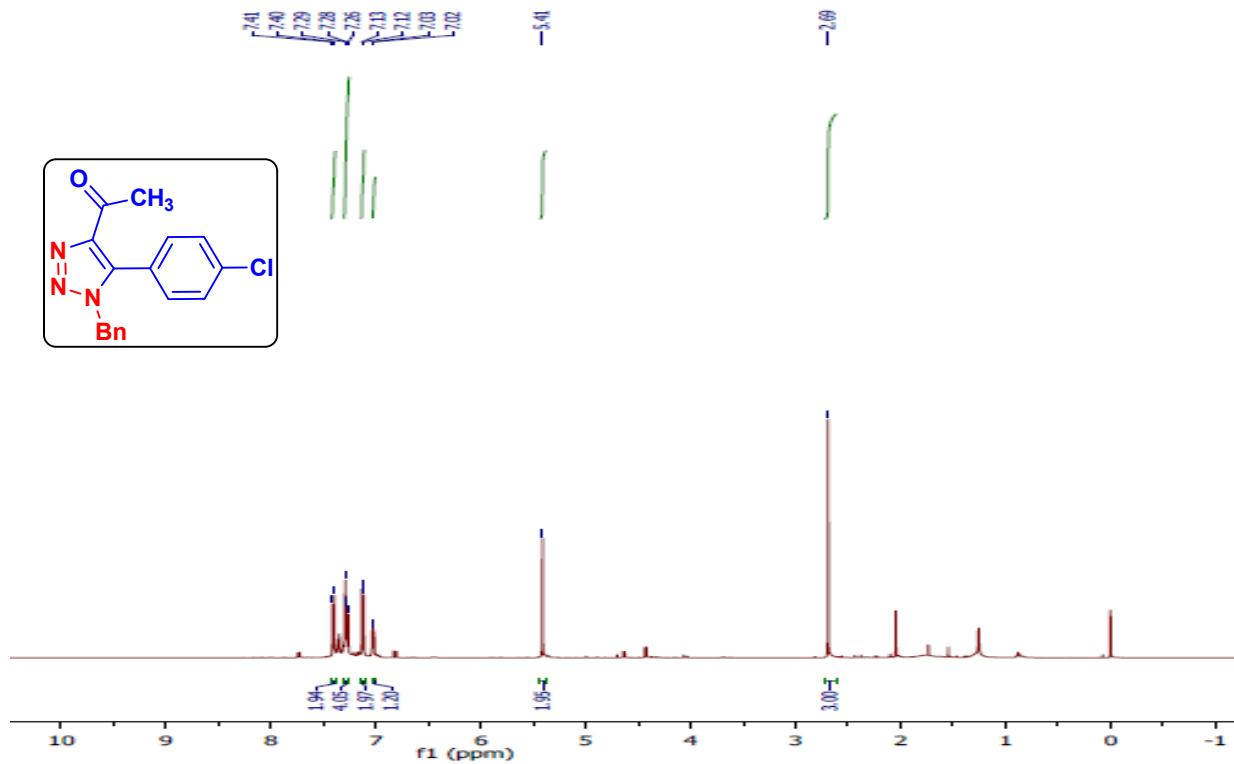

**1-(1-benzyl-5-(4-chlorophenyl)-1H-1,2,3-triazol-4-yl)ethanone:**

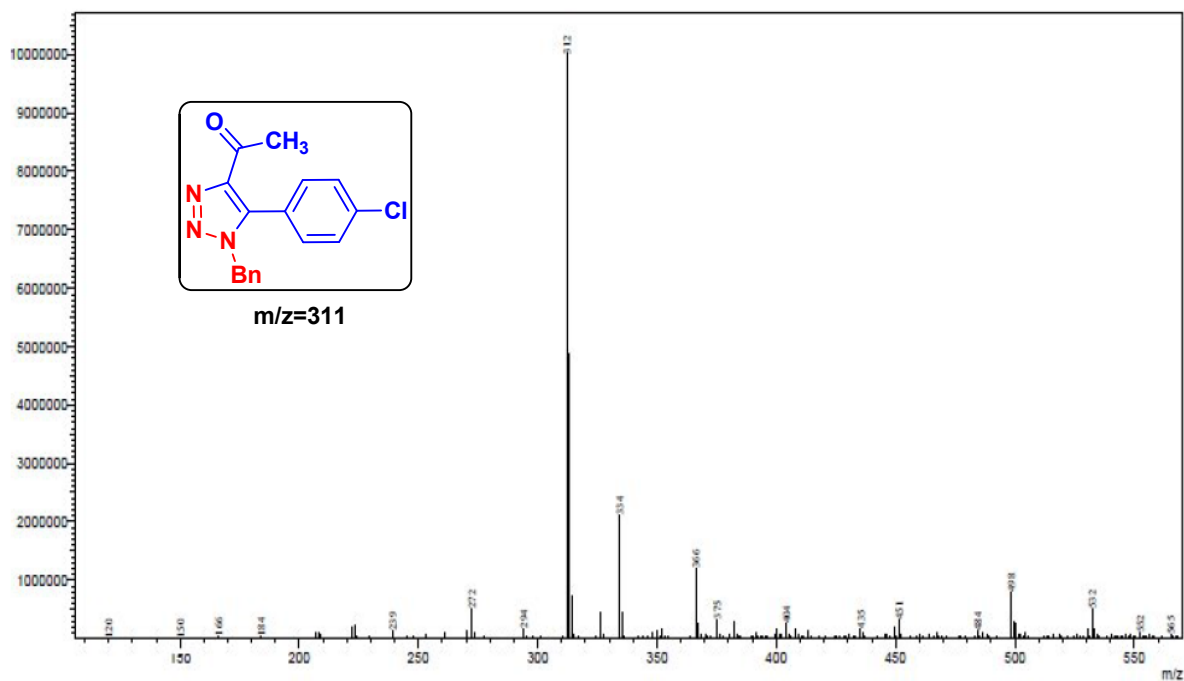

1-(1-benzyl-5-(4-nitrophenyl)-1H-1,2,3-triazol-4-yl)ethanone:

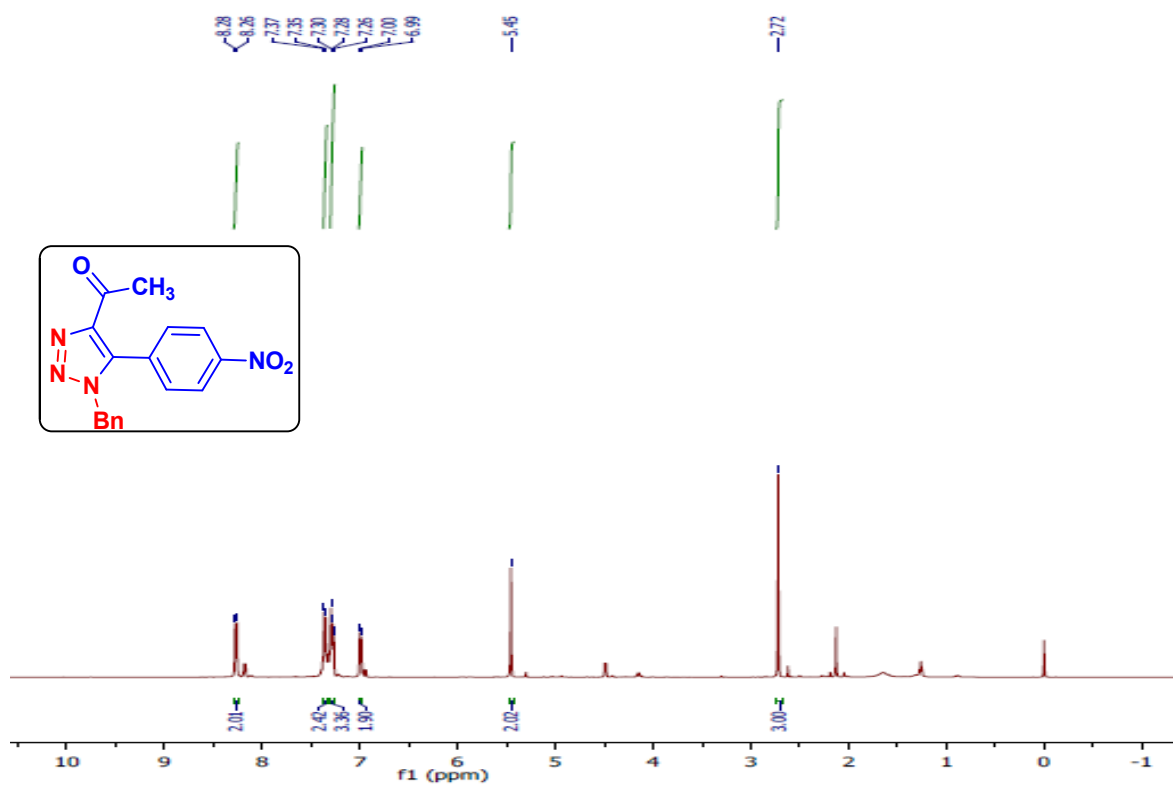

1-(1-benzyl-5-(4-nitrophenyl)-1H-1,2,3-triazol-4-yl)ethanone:

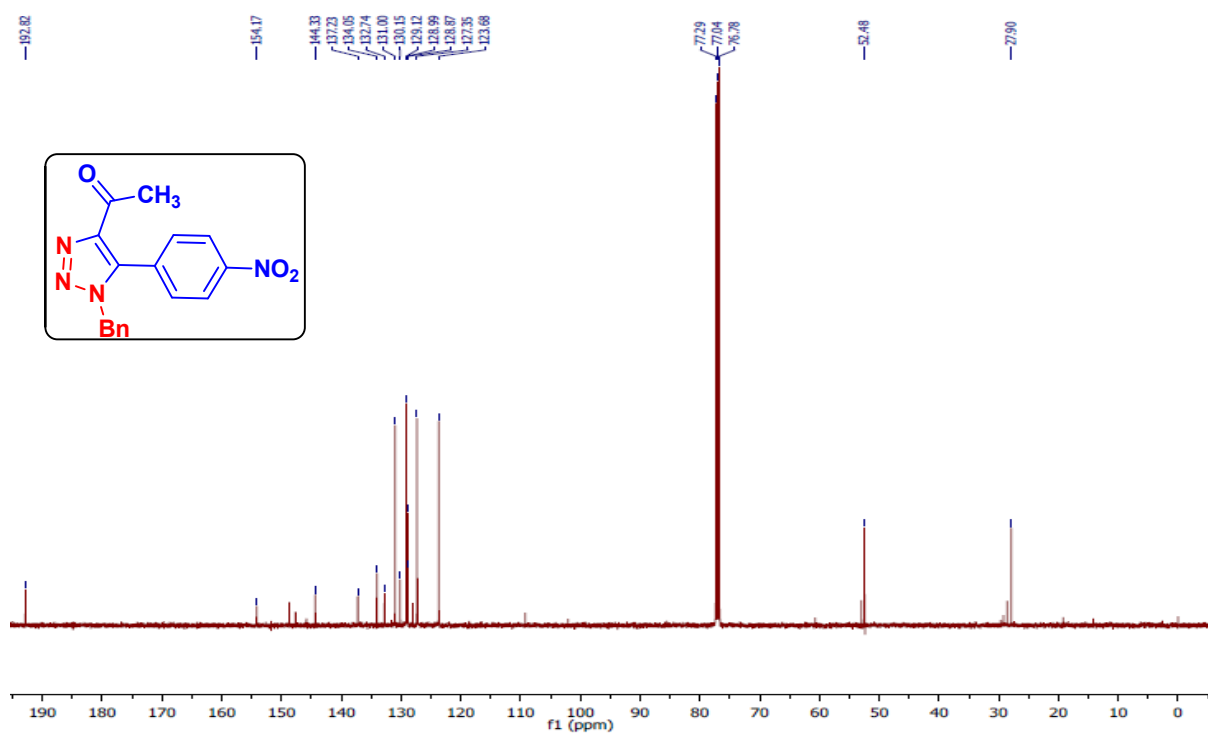

1-(1-benzyl-5-(4-nitrophenyl)-1H-1,2,3-triazol-4-yl)ethanone:

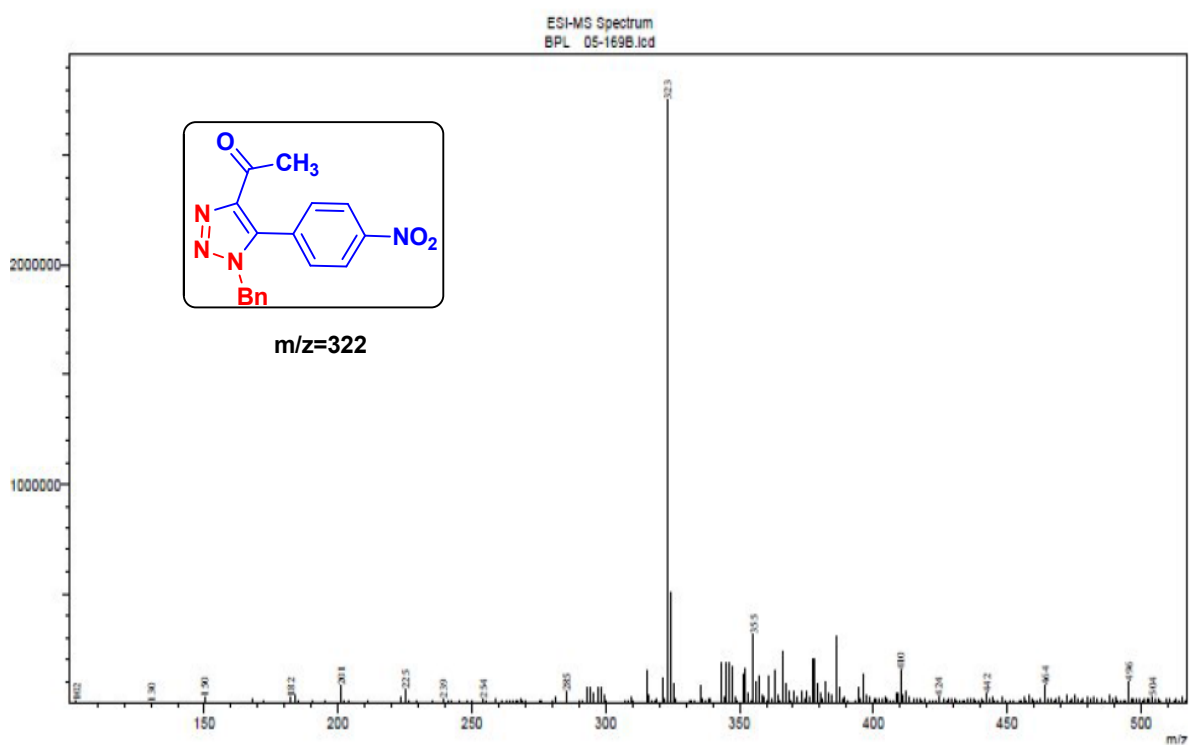

1-(1-benzyl-5-(3-nitrophenyl)-1H-1,2,3-triazol-4-yl) ethanone:

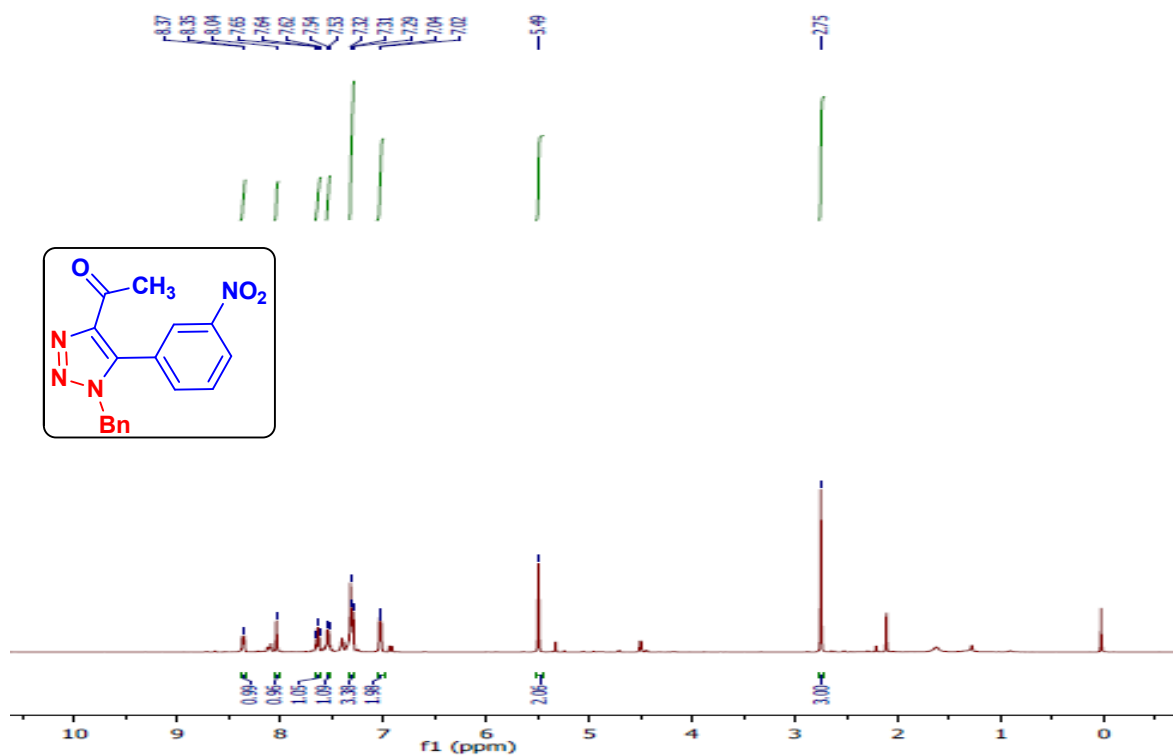

1-(1-benzyl-5-(3-nitrophenyl)-1H-1,2,3-triazol-4-yl) ethanone:

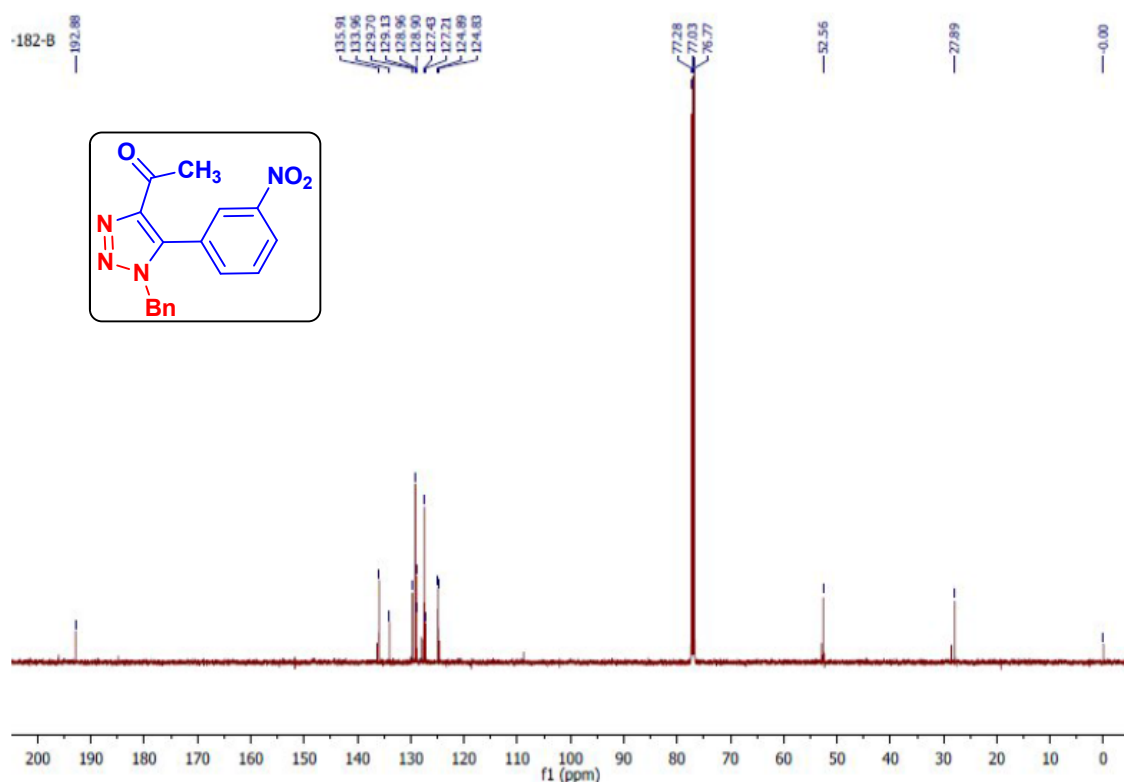

1-(1-benzyl-5-1H-1,2,3-triazol-4-yl)ethanone:

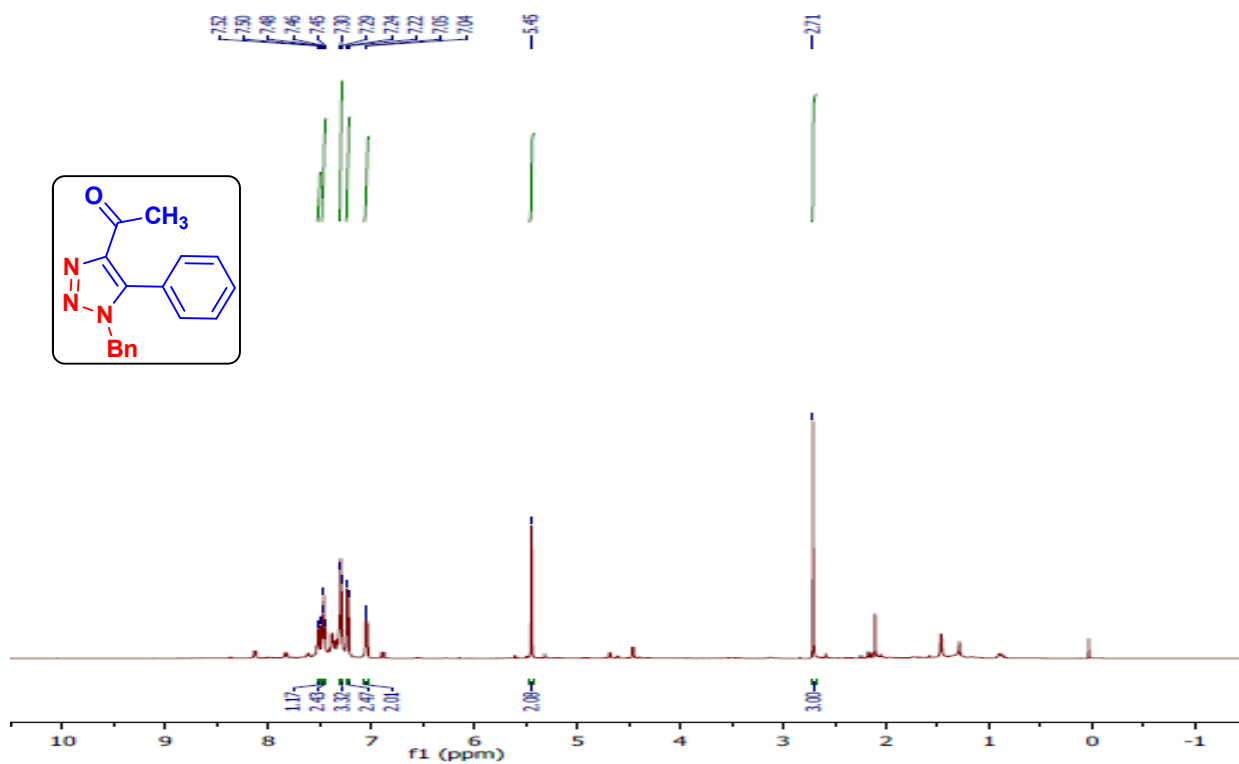

1-(1-benzyl-5-1H-1,2,3-triazol-4-yl)ethanone:

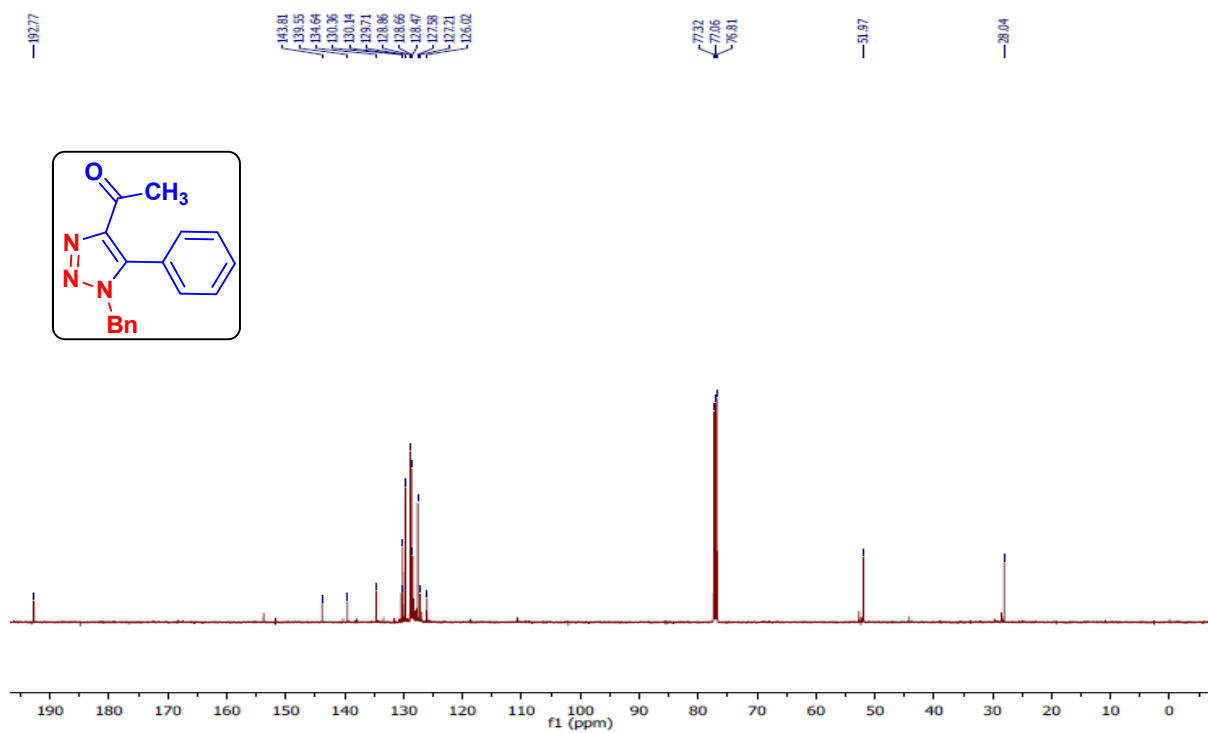

1-(1-benzyl-5-1H-1,2,3-triazol-4-yl)ethanone:

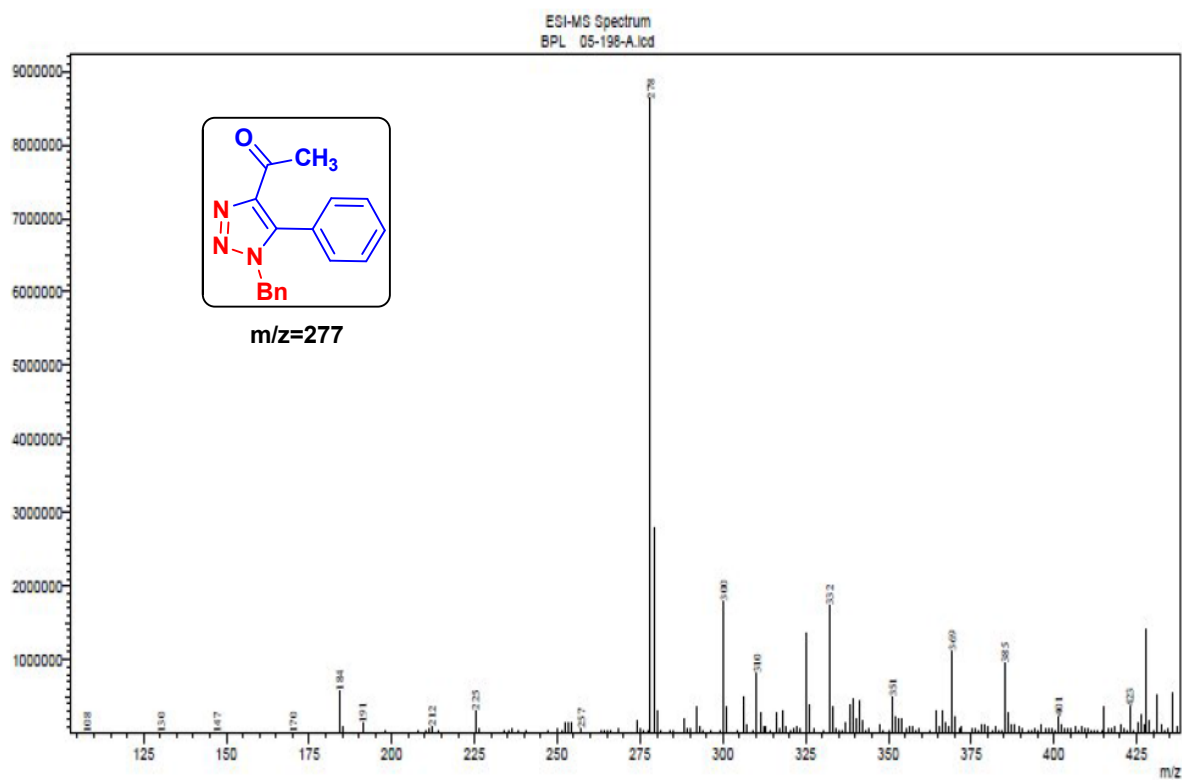

1-(1-benzyl-5-(naphthalen-1-yl)-1H-1,2,3-triazol-4-yl)ethanone:

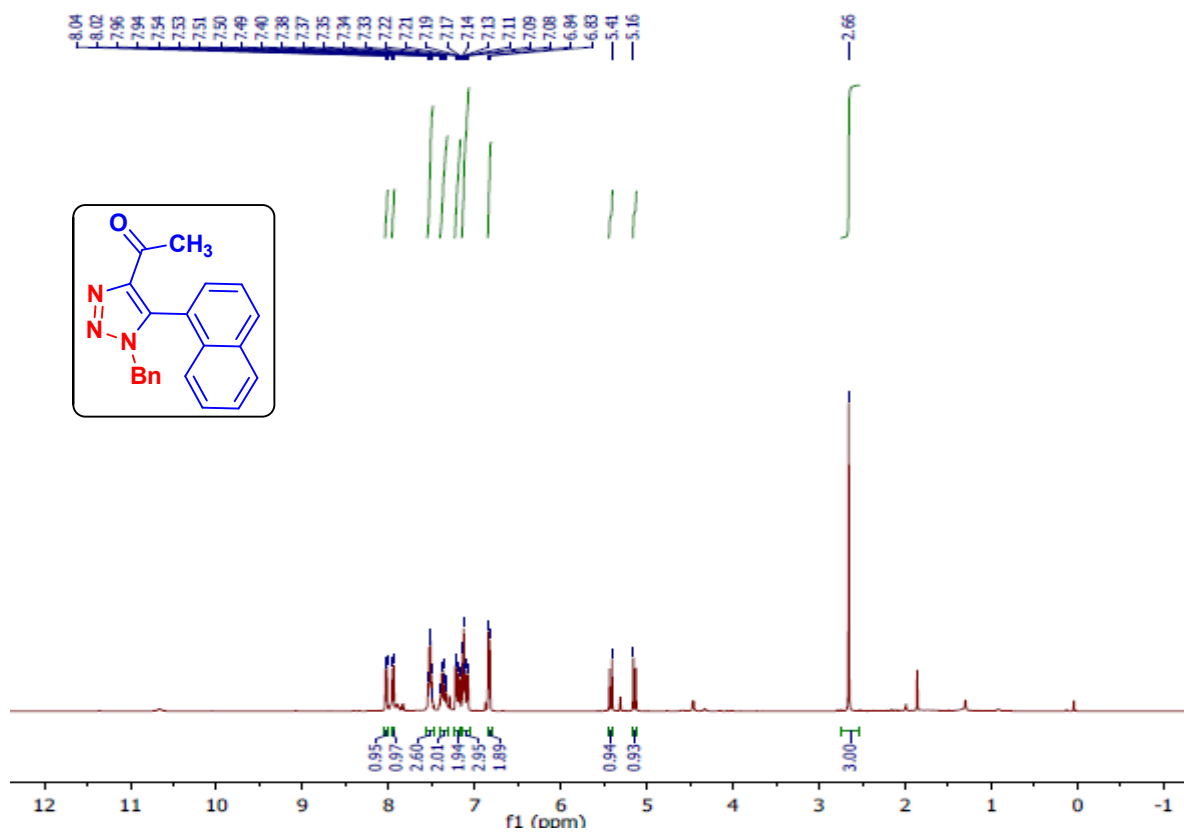



1-(1-benzyl-5-(naphthalen-1-yl)-1H-1,2,3-triazol-4-yl)ethanone:

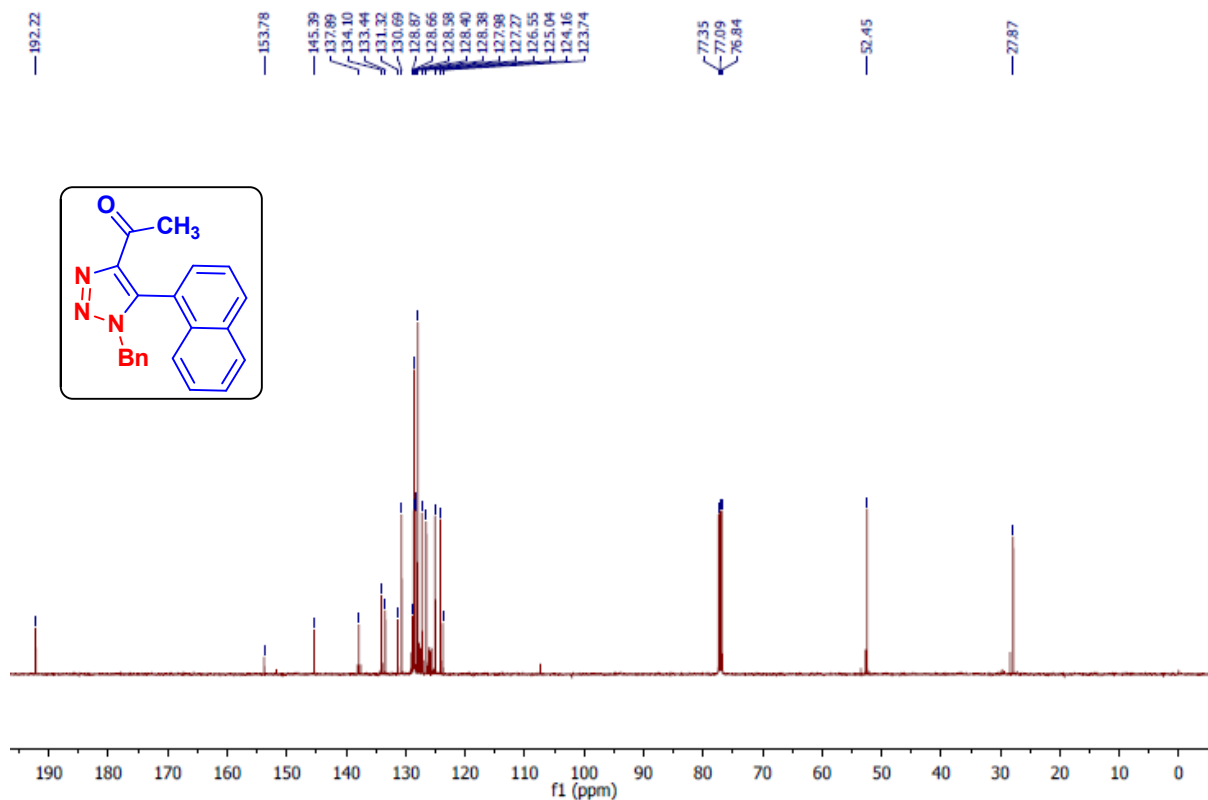

1-(1-benzyl-5-(naphthalen-1-yl)-1H-1,2,3-triazol-4-yl)ethanone:

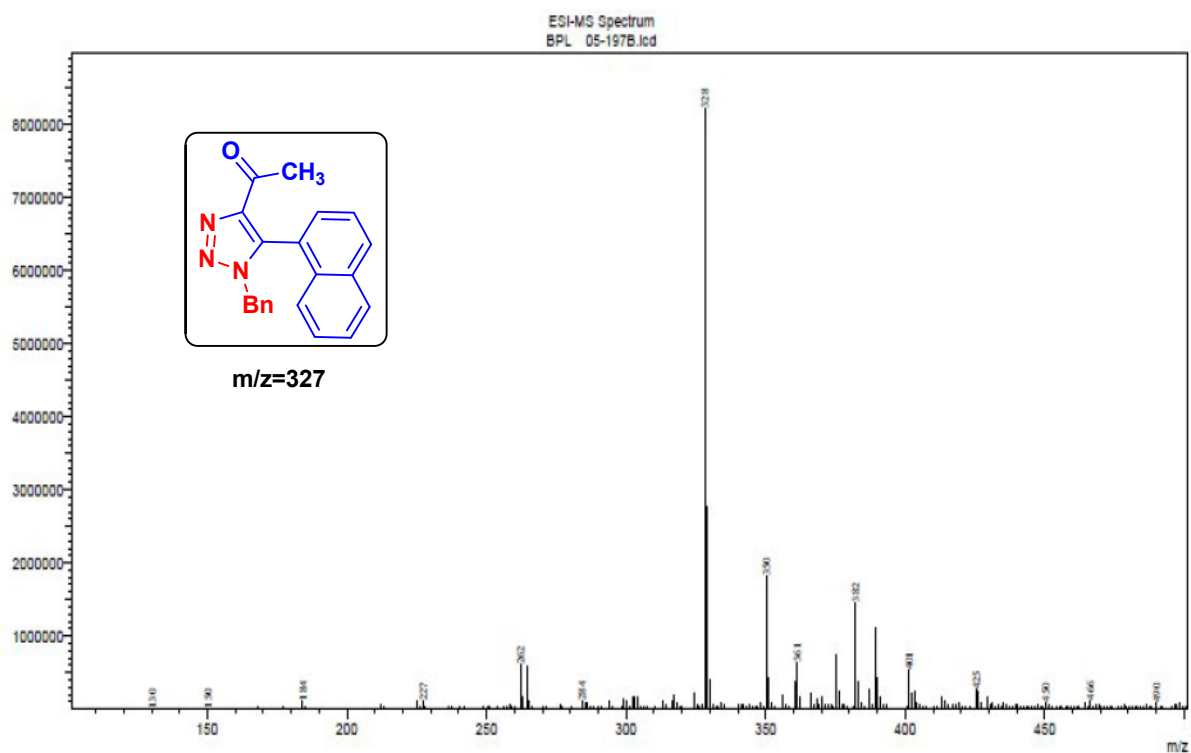

1-(1-benzyl-5-(2-chloroquinolin-3-yl)-1H-1,2,3-triazol-4-yl)ethanone:

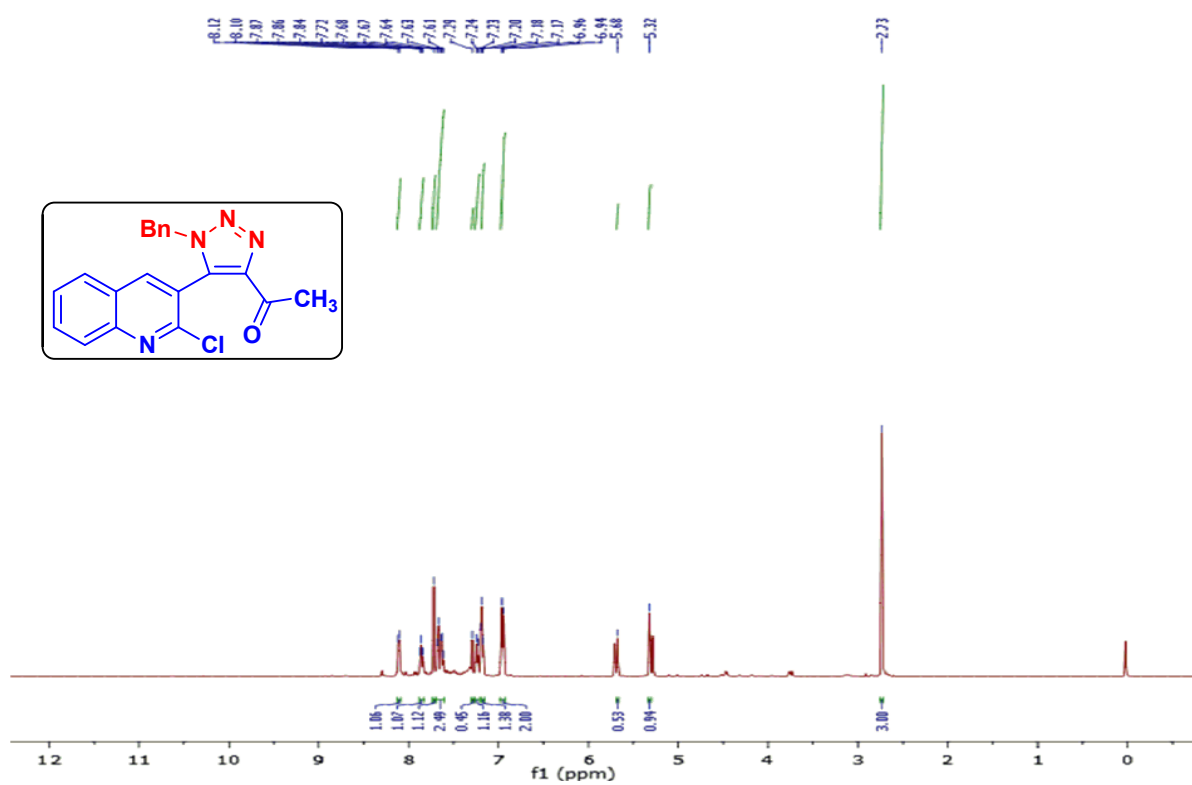

1-(1-benzyl-5-(2-chloroquinolin-3-yl)-1H-1,2,3-triazol-4-yl)ethanone:

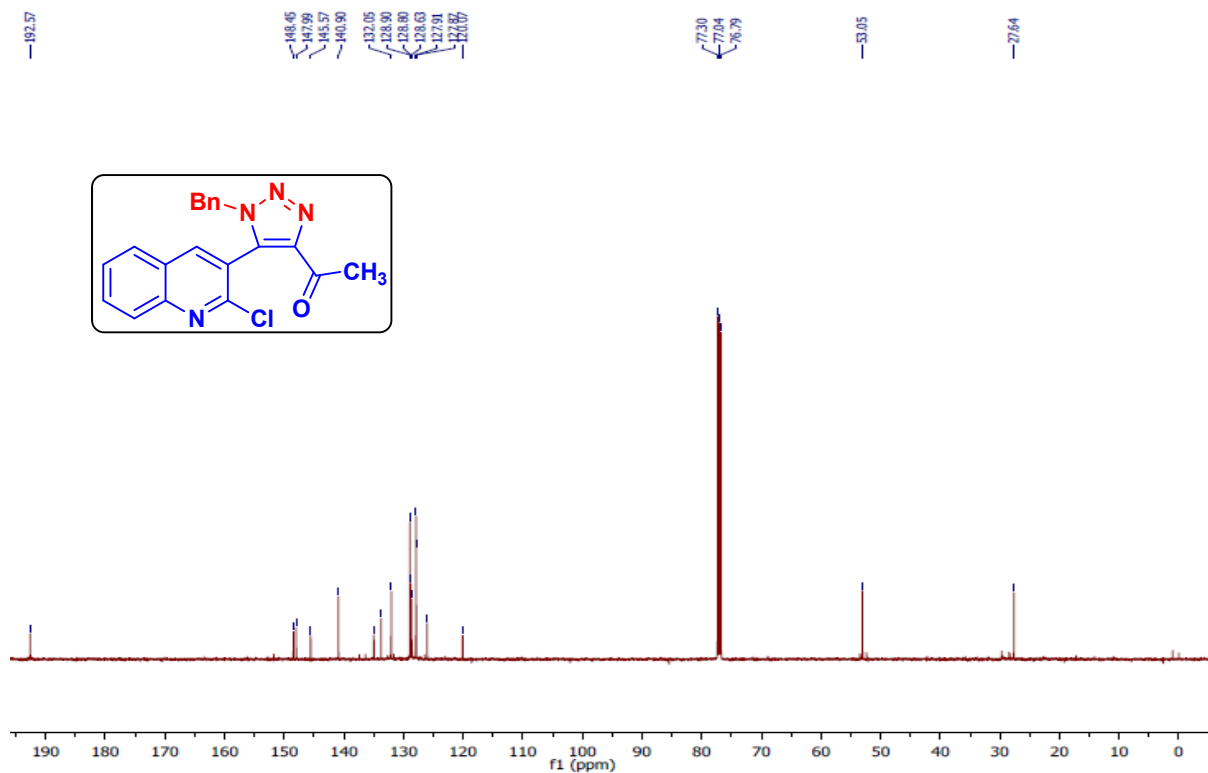

**1-(1-benzyl-5-(2-chloroquinolin-3-yl)-1H-1,2,3-triazol-4-yl)ethanone:**

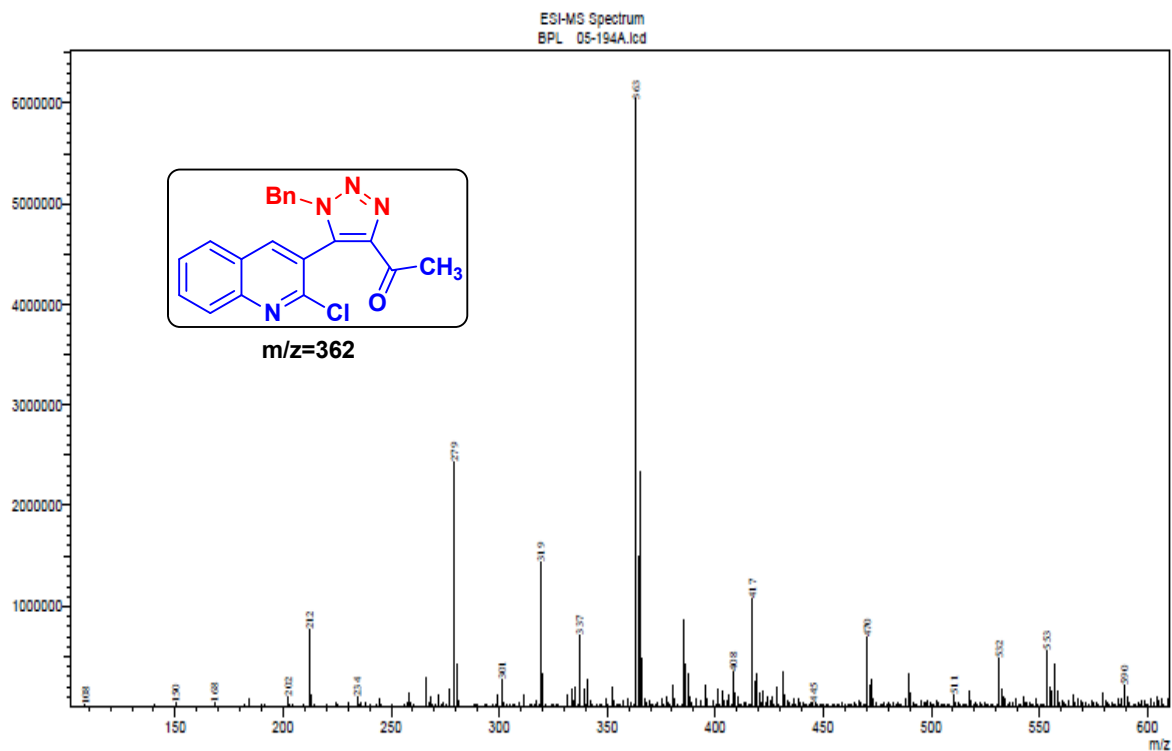

**1-(1-benzyl-5-(4-methoxyphenyl)-1H-1,2,3-Triazole-4-yl)ethanone:**

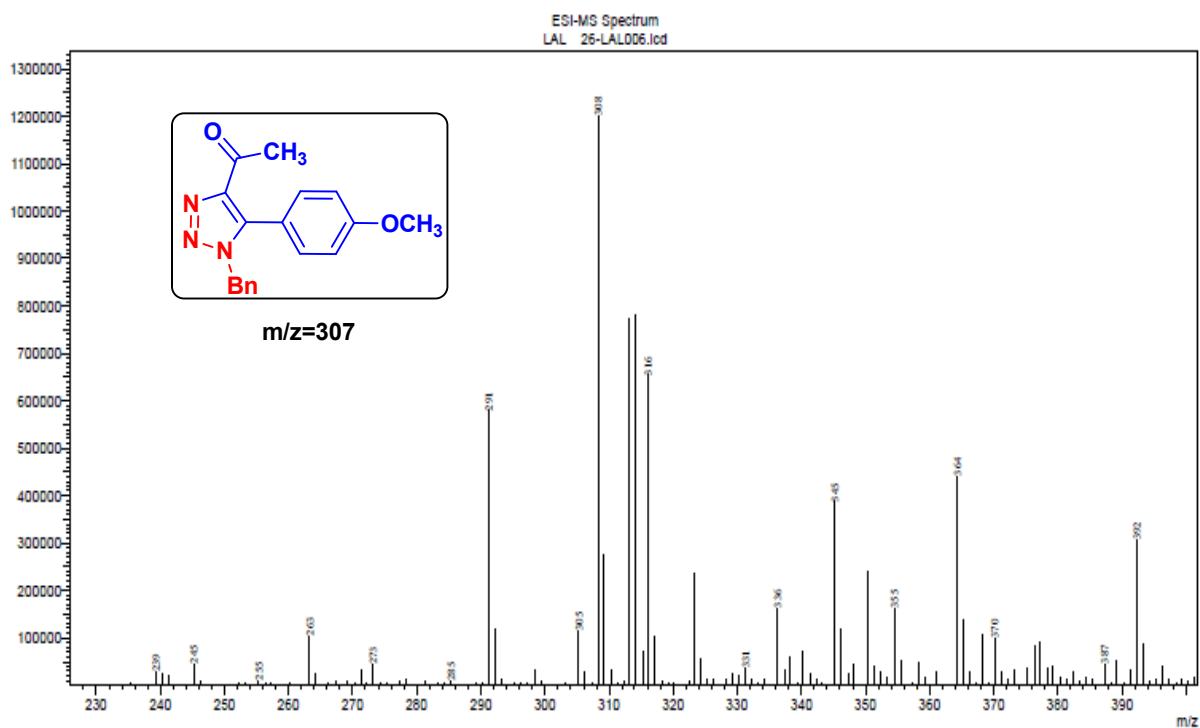

**(Z)-3-(benzylamino)-3-(4-nitrophenyl)-1-phenylprop-2-en-1-one:**

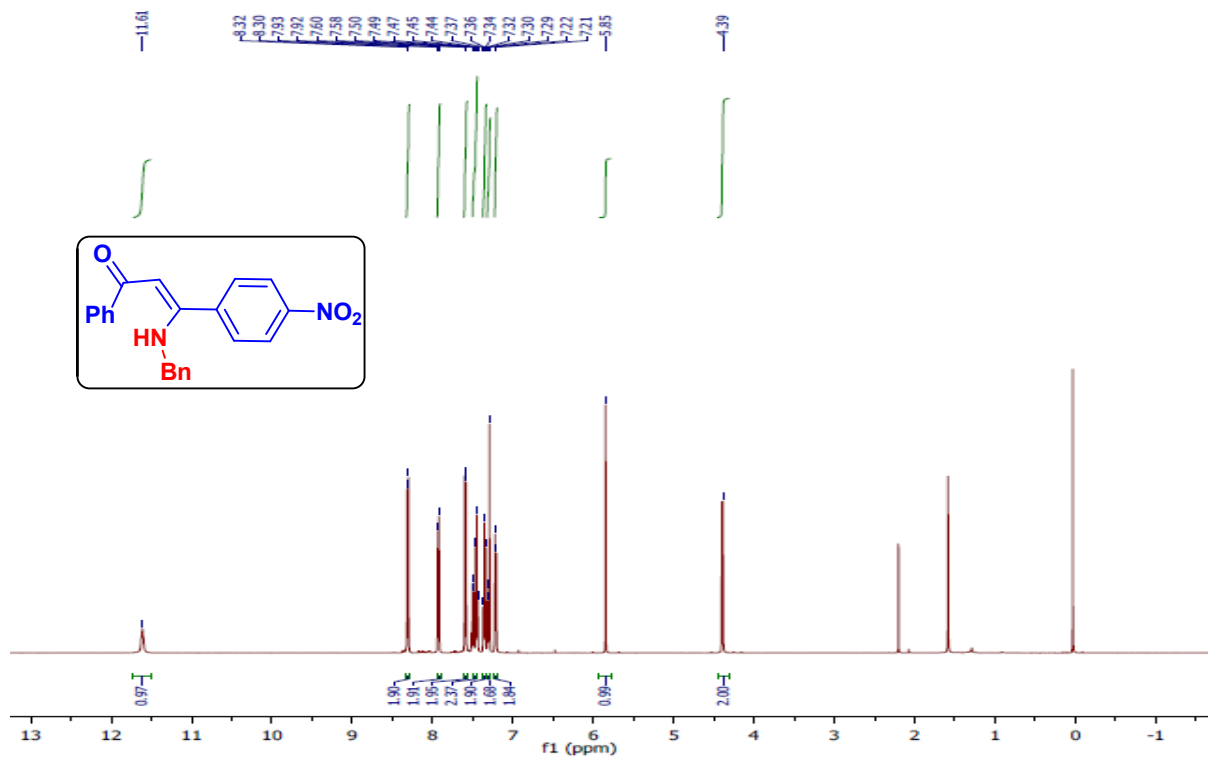

**(Z)-3-(benzylamino)-3-(4-nitrophenyl)-1-phenylprop-2-en-1-one:**

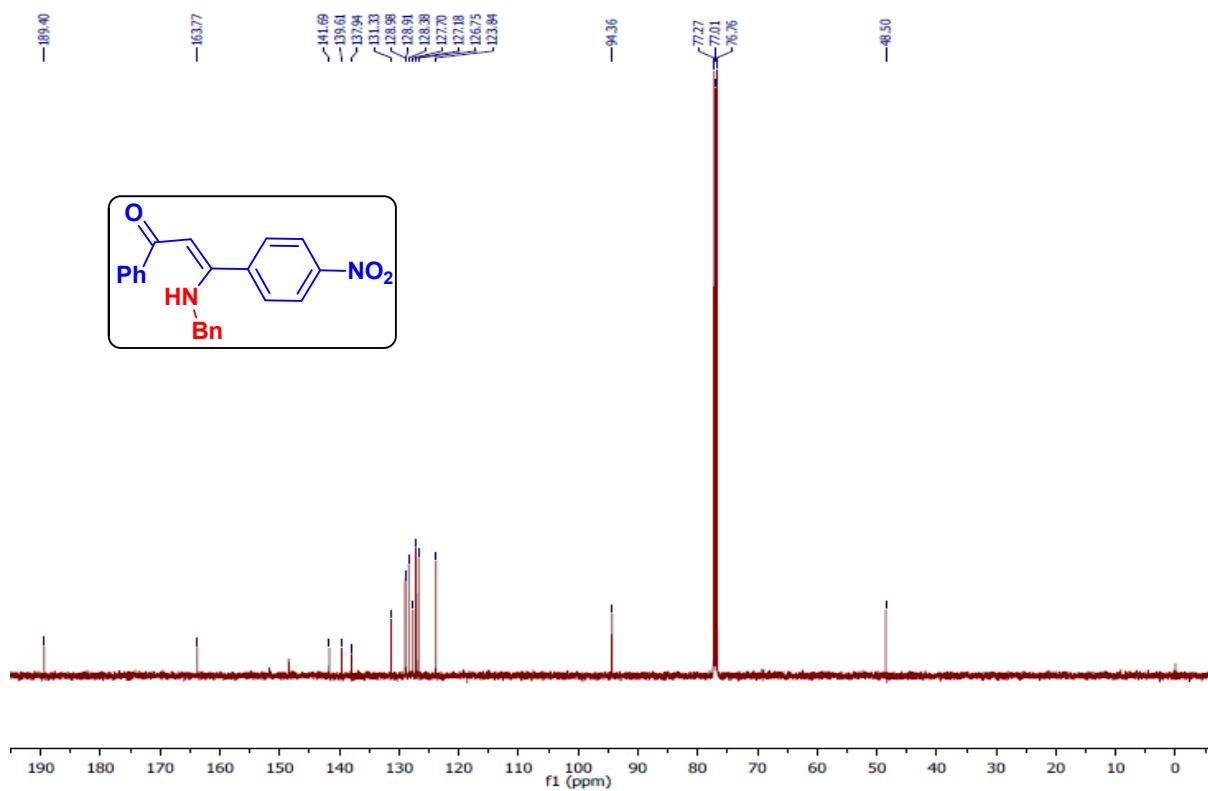

**(Z)-3-(benzylamino)-3-(4-nitrophenyl)-1-phenylprop-2-en-1-one:**

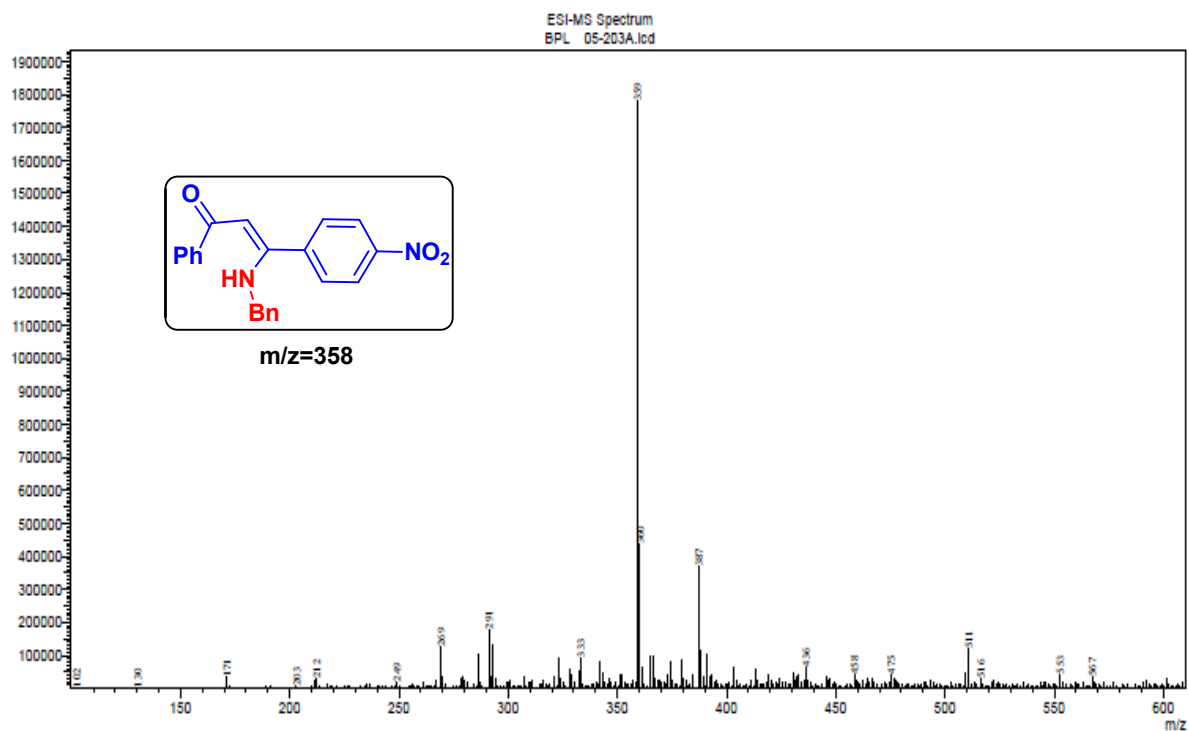

**(Z)-4-(benzylamino)-4-(4-methoxyphenyl)but-3-en-2-one:**

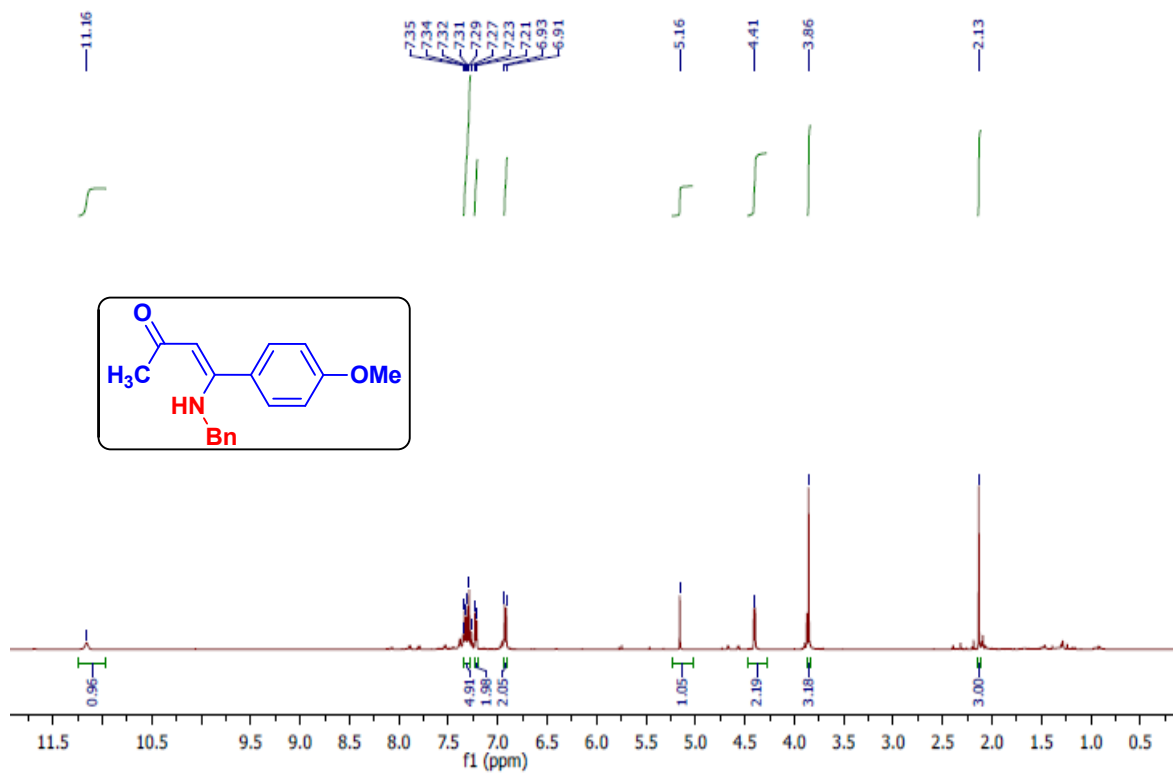

**(Z)-4-(benzylamino)-4-(4-methoxyphenyl)but-3-en-2-one:**

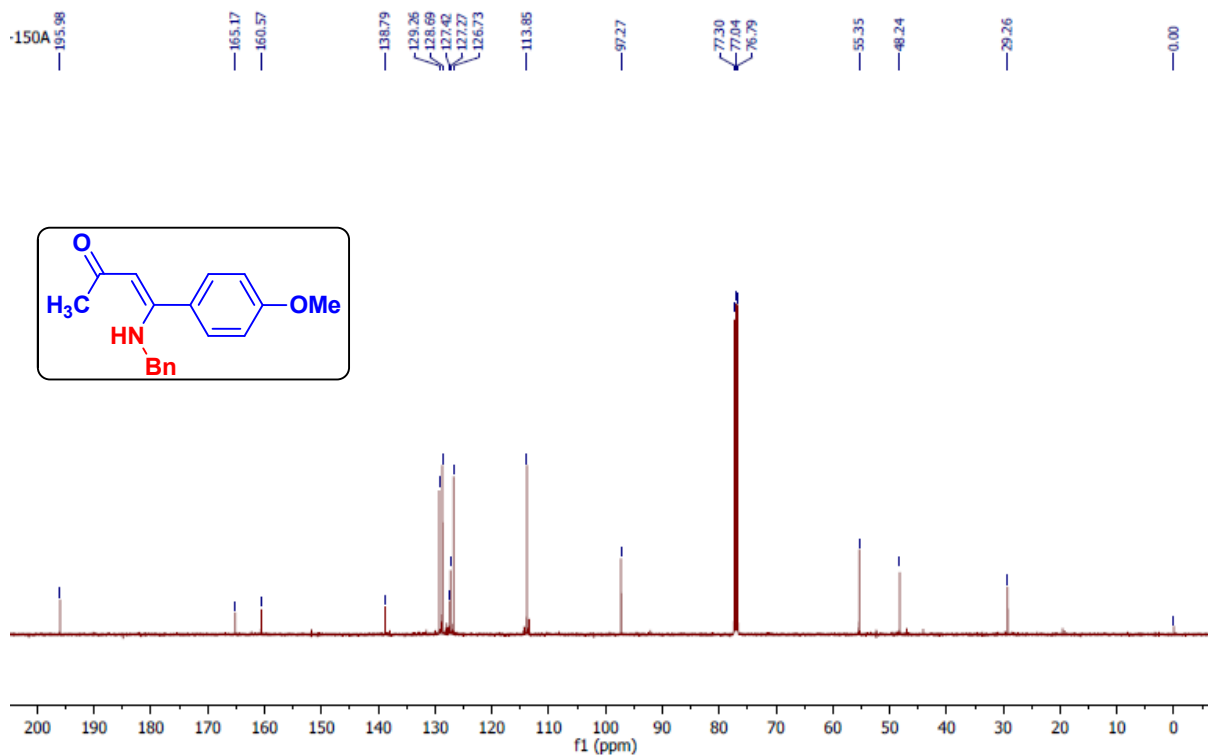

**(Z)-4-(benzylamino)-4-(4-methoxyphenyl)but-3-en-2-one:**

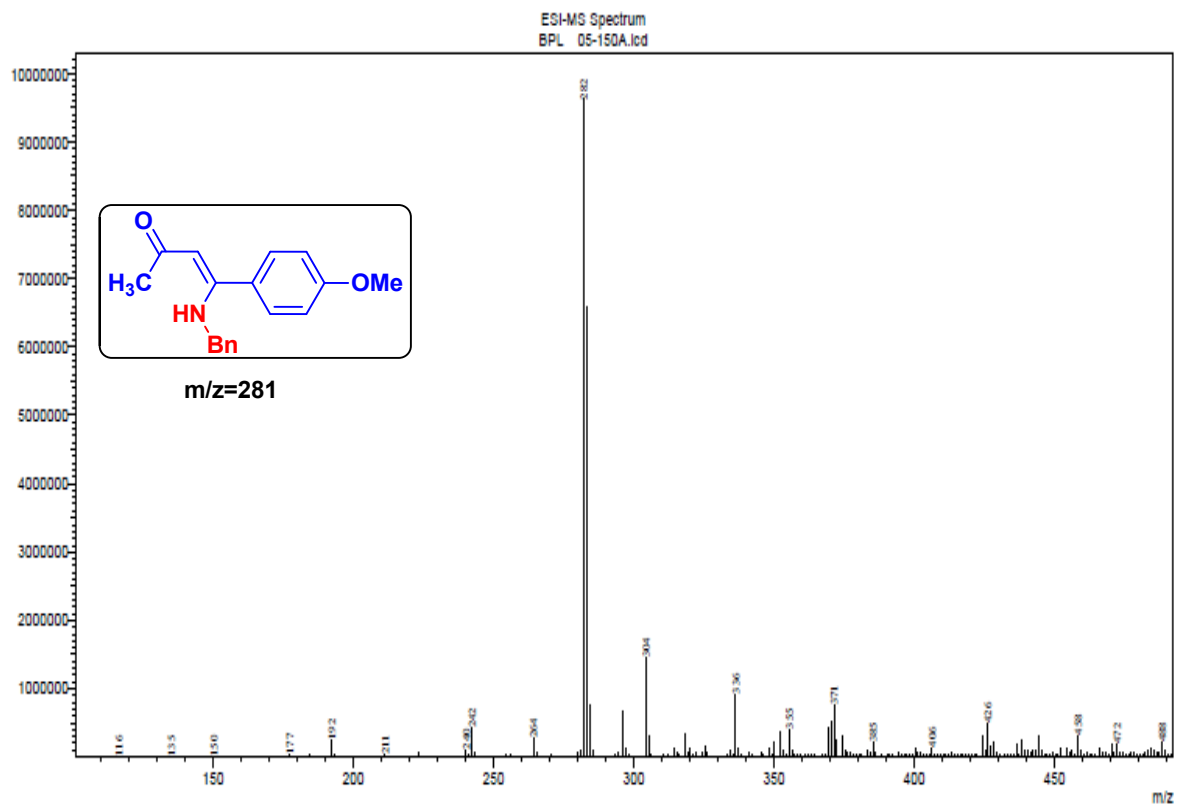

**(Z)-4-(benzylamino)-4-(3,4-dimethoxyphenyl)but-3-en-2-one:**

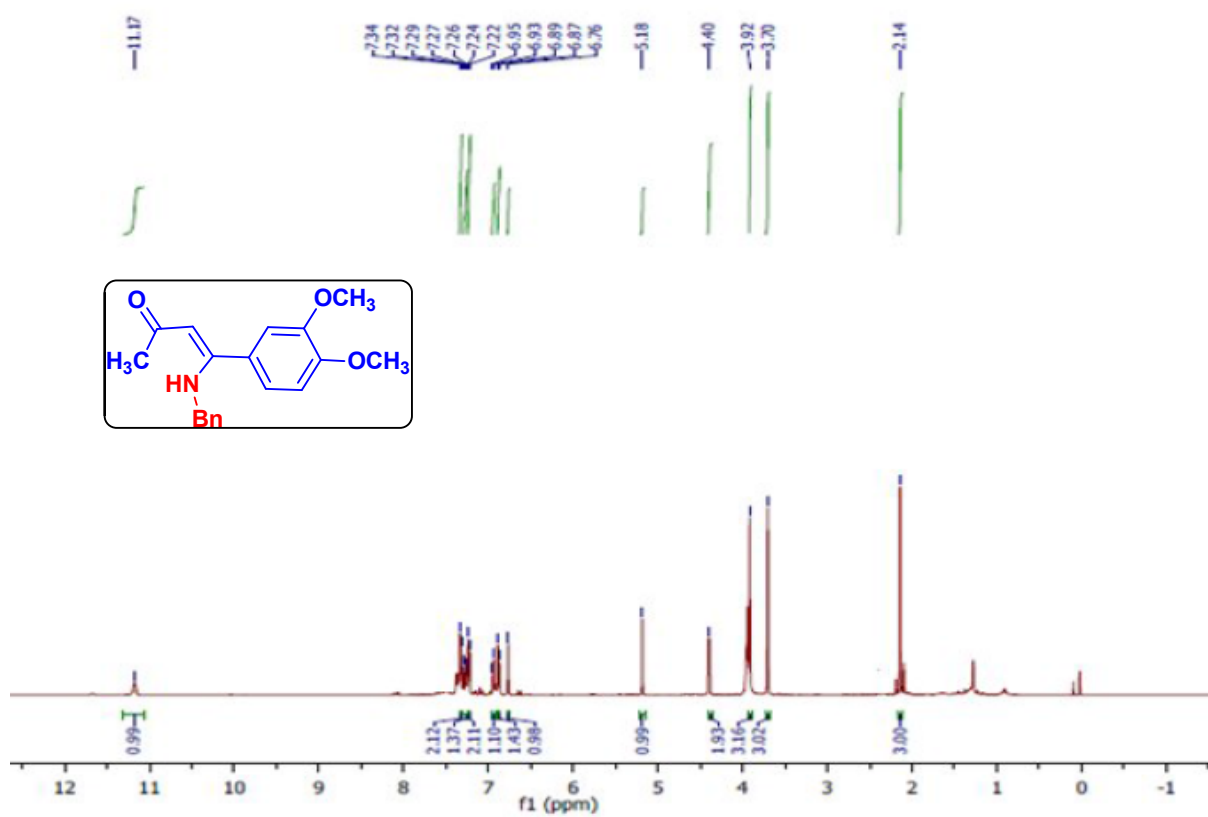

**(Z)-4-(benzylamino)-4-(3,4-dimethoxyphenyl)but-3-en-2-one:**

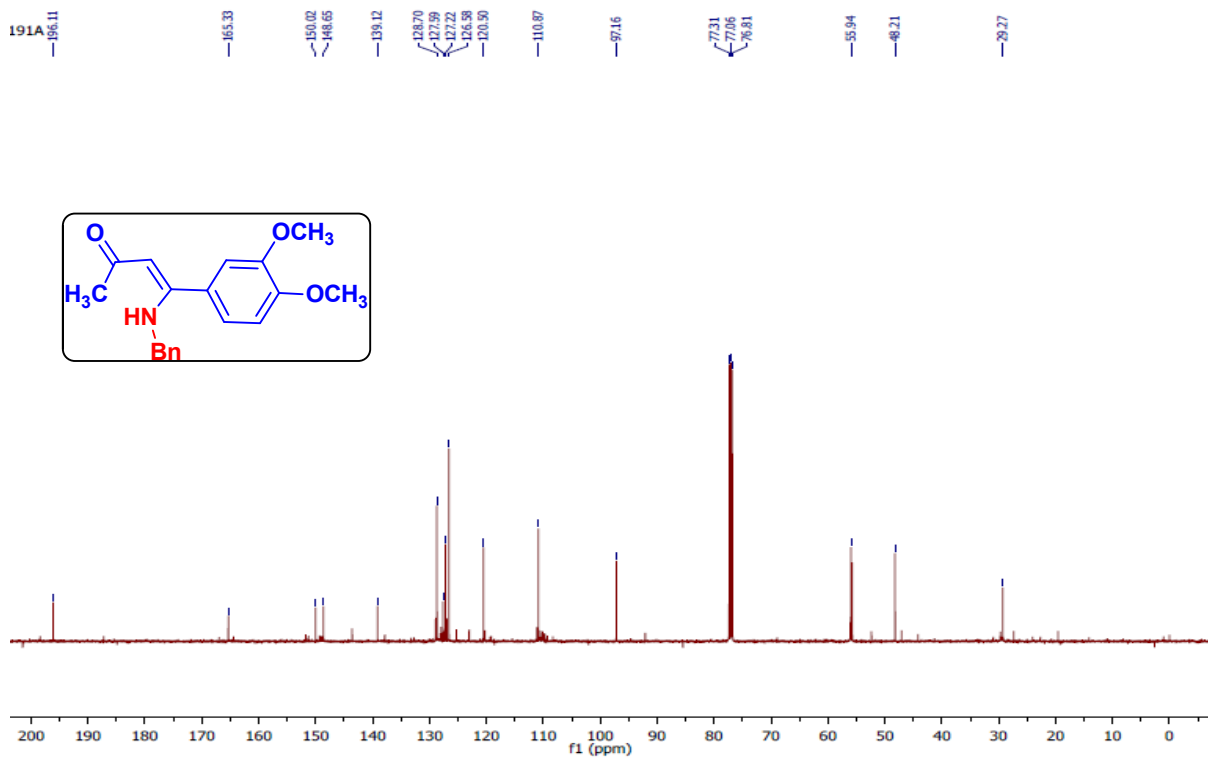

**(Z)-4-(benzylamino)-4-(3,4-dimethoxyphenyl)but-3-en-2-one:**

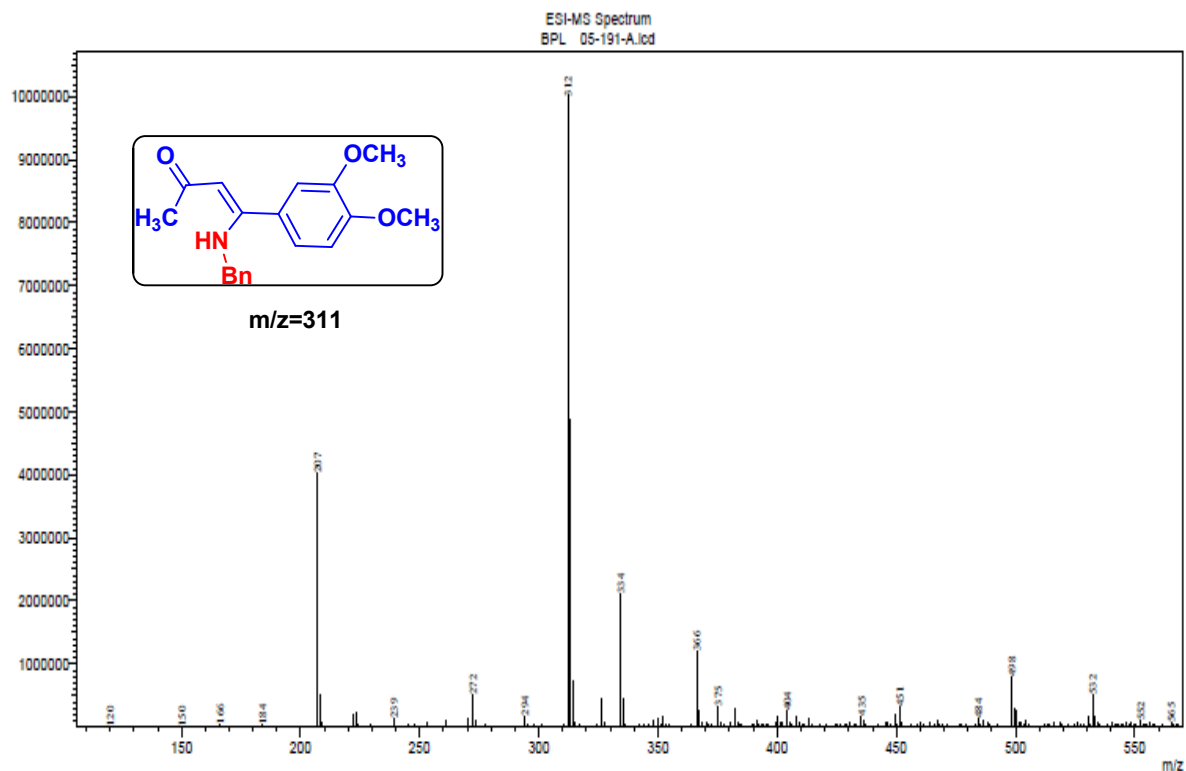

**(Z)-4-(benzylamino)-4-(4-bromophenyl)but-3-en-2-one:**

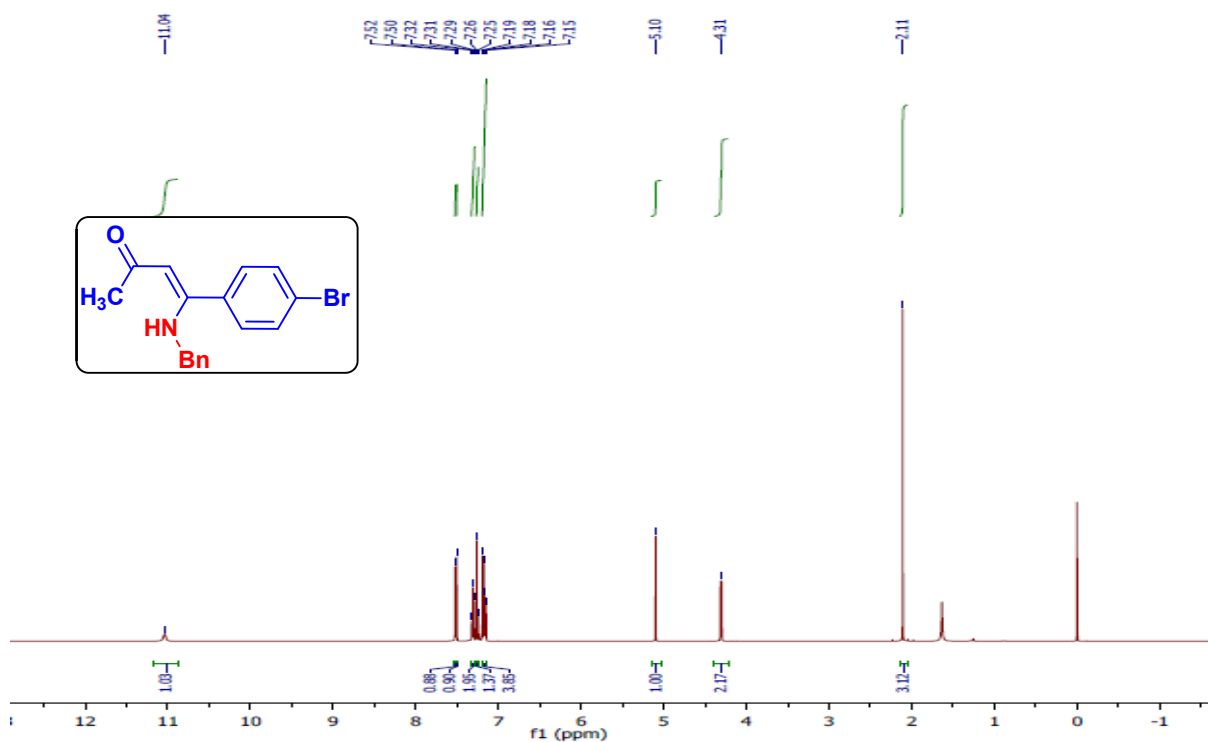



**(Z)-4-(benzylamino)-4-(4-bromophenyl)but-3-en-2-one:**

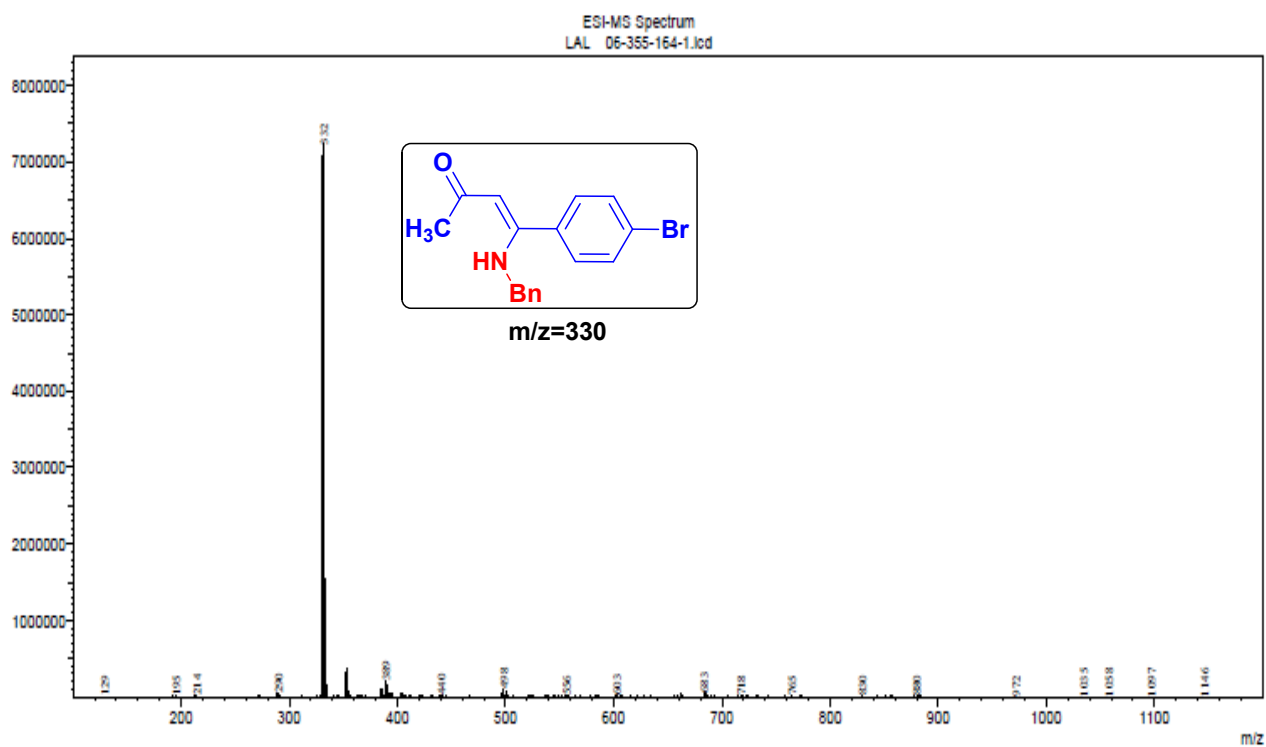

**(Z)-4-(benzylamino)-4-(4-chlorophenyl)but-3-en-2-one:**

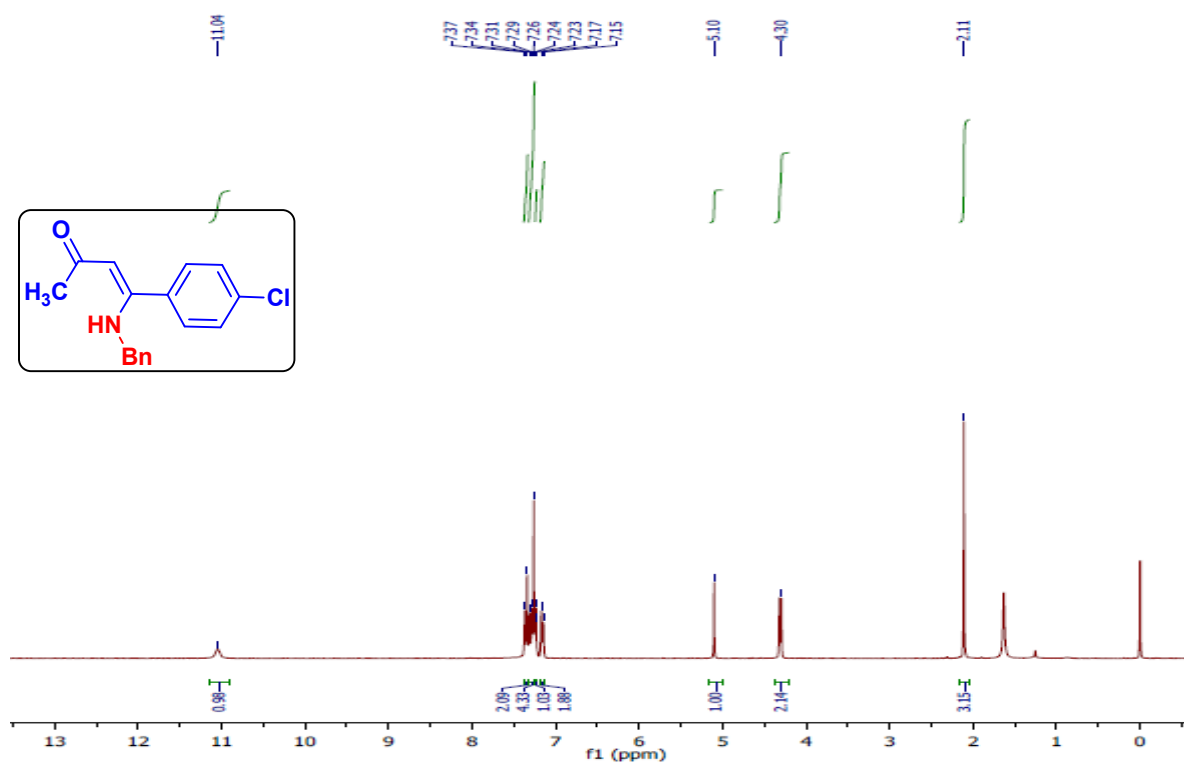

**(Z)-4-(benzylamino)-4-(4-chlorophenyl)but-3-en-2-one:**

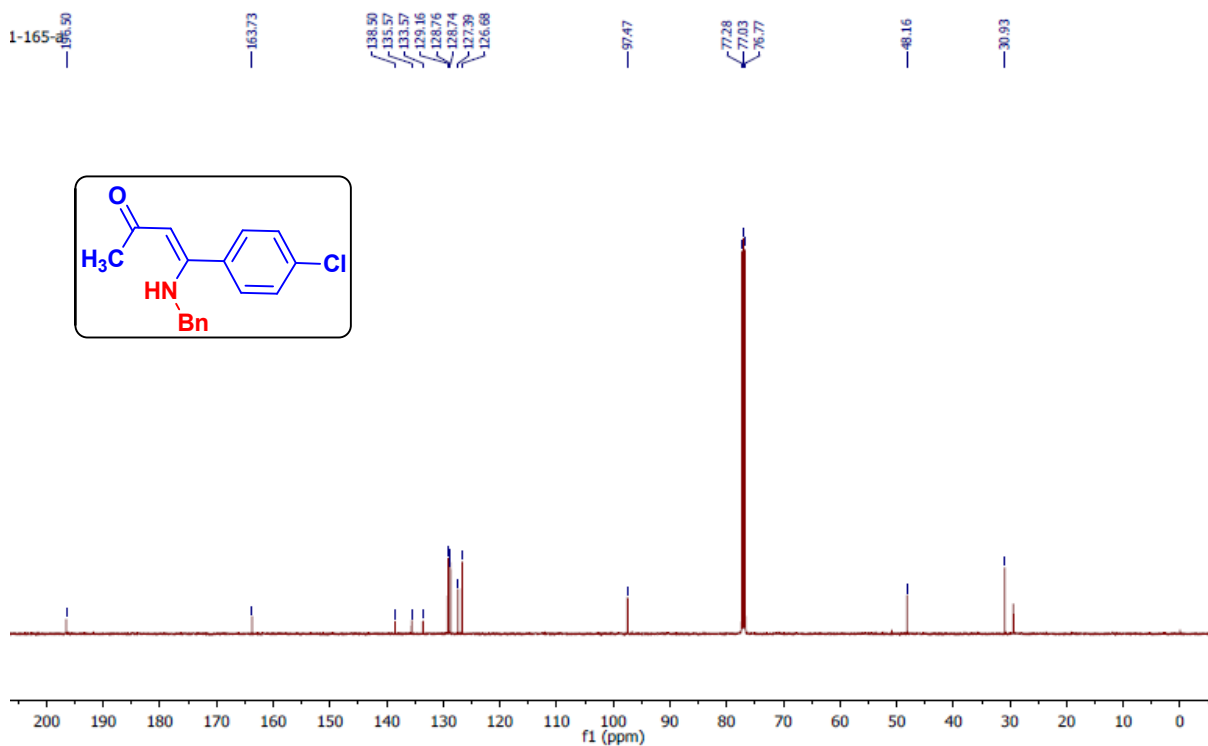

**(Z)-4-(benzylamino)-4-(4-chlorophenyl)but-3-en-2-one:**

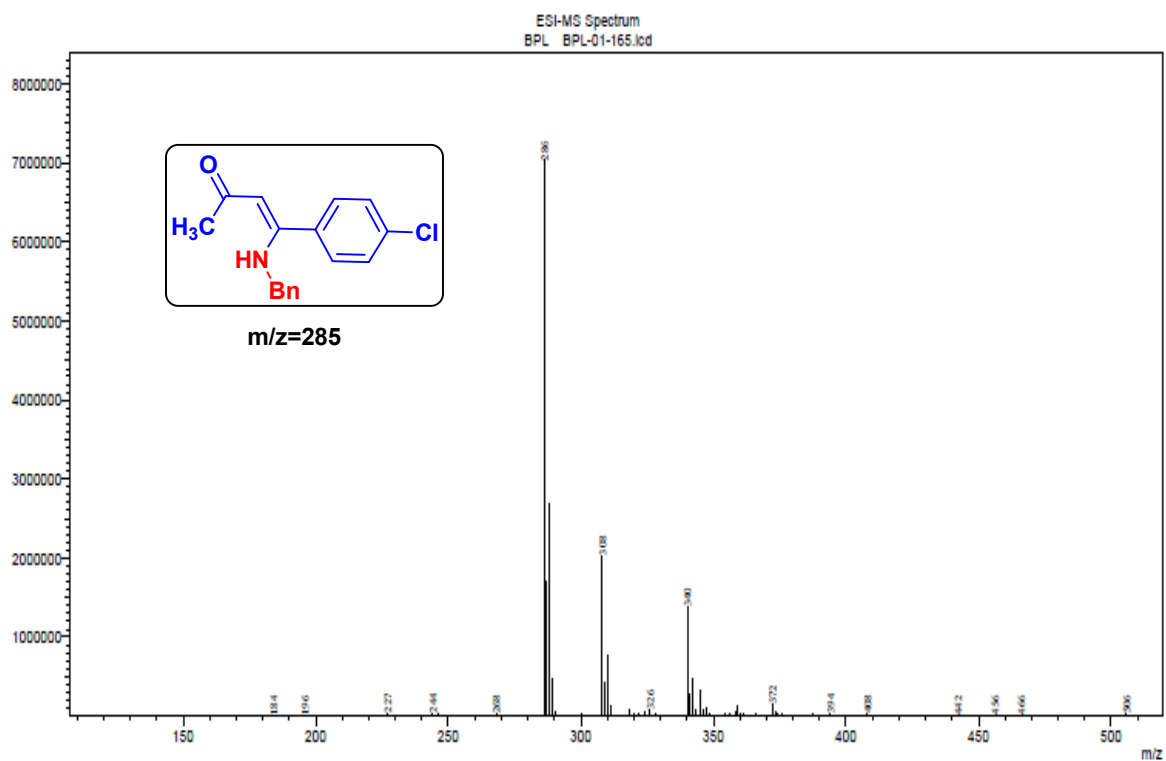

**(Z)-4-(benzylamino)-4-(4-nitrophenyl)but-3-en-2-one:**

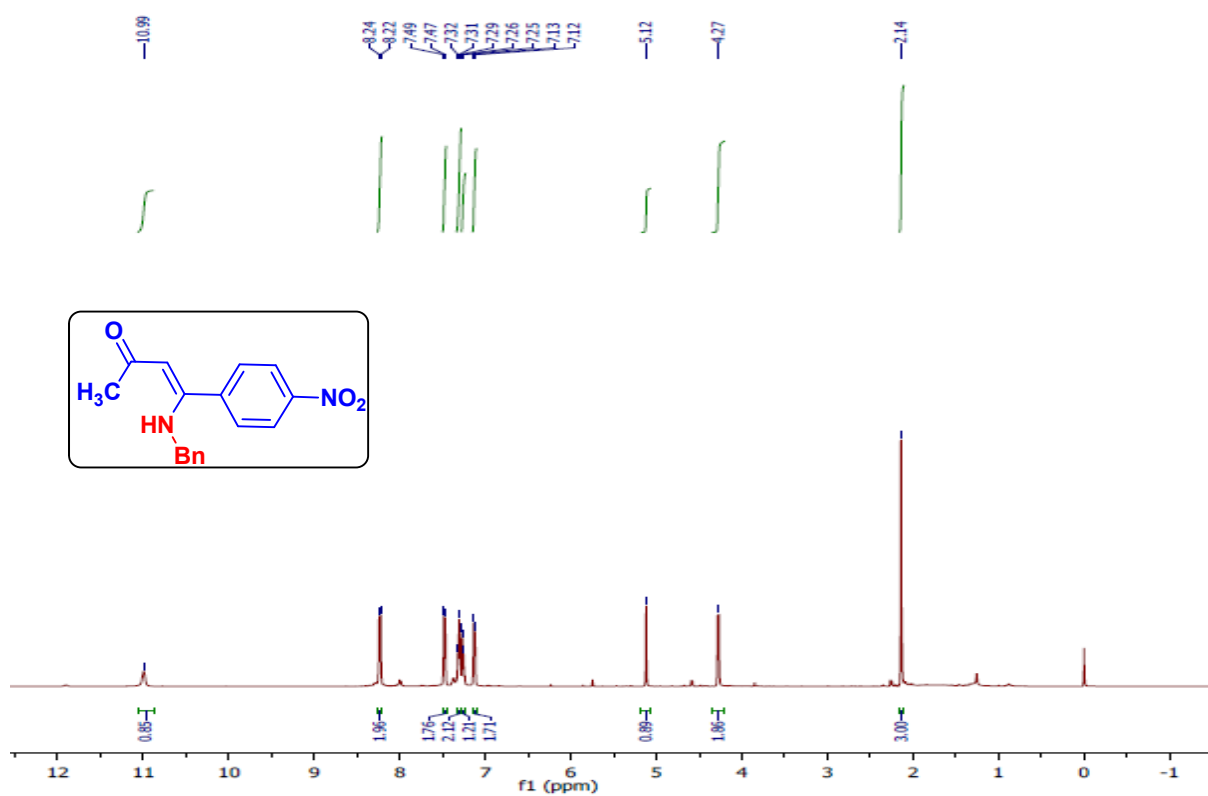

**(Z)-4-(benzylamino)-4-(4-nitrophenyl)but-3-en-2-one:**

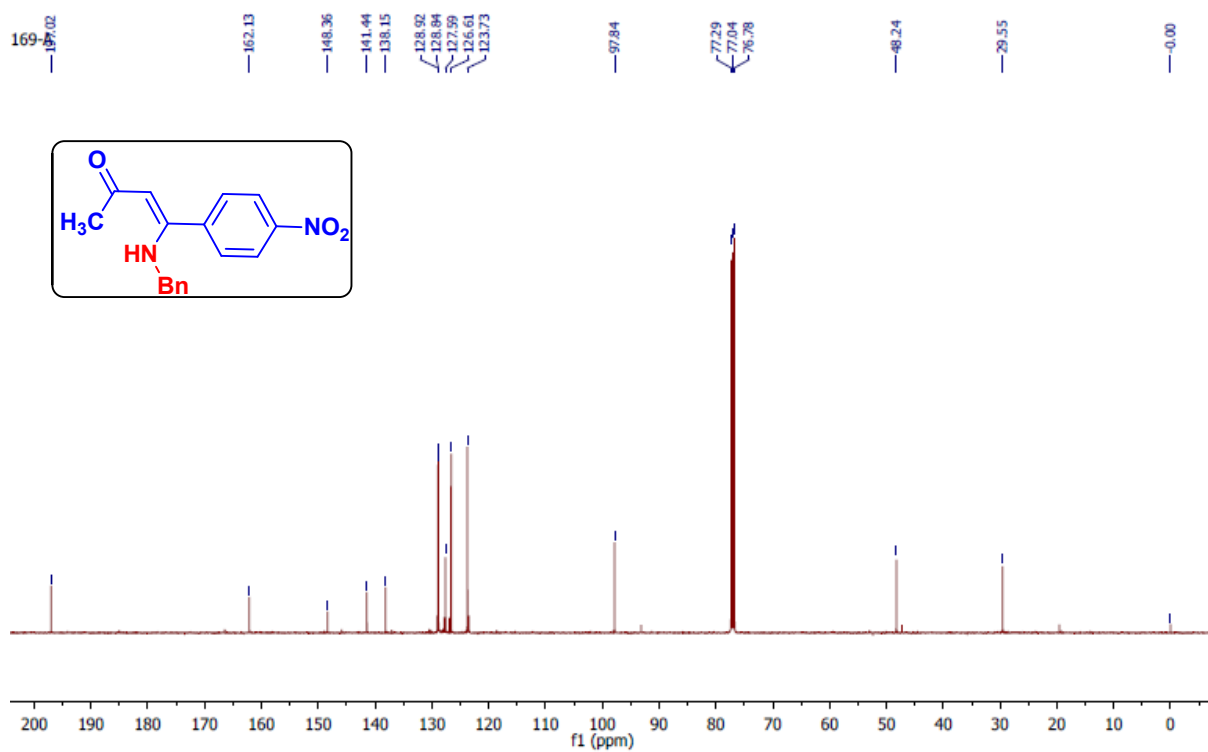

**(Z)-4-(benzylamino)-4-(4-nitrophenyl)but-3-en-2-one:**

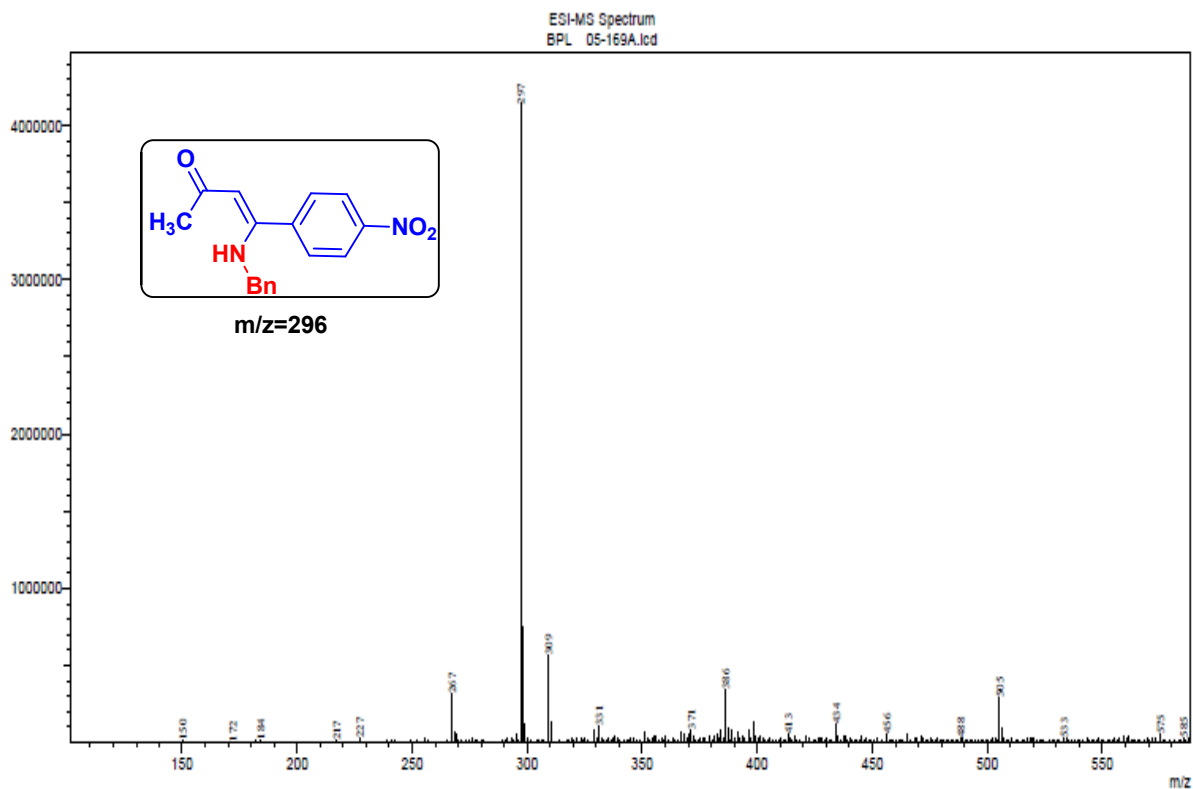

**(Z)-4-(benzylamino)-4-(3-nitrophenyl)but-3-en-2-one:**

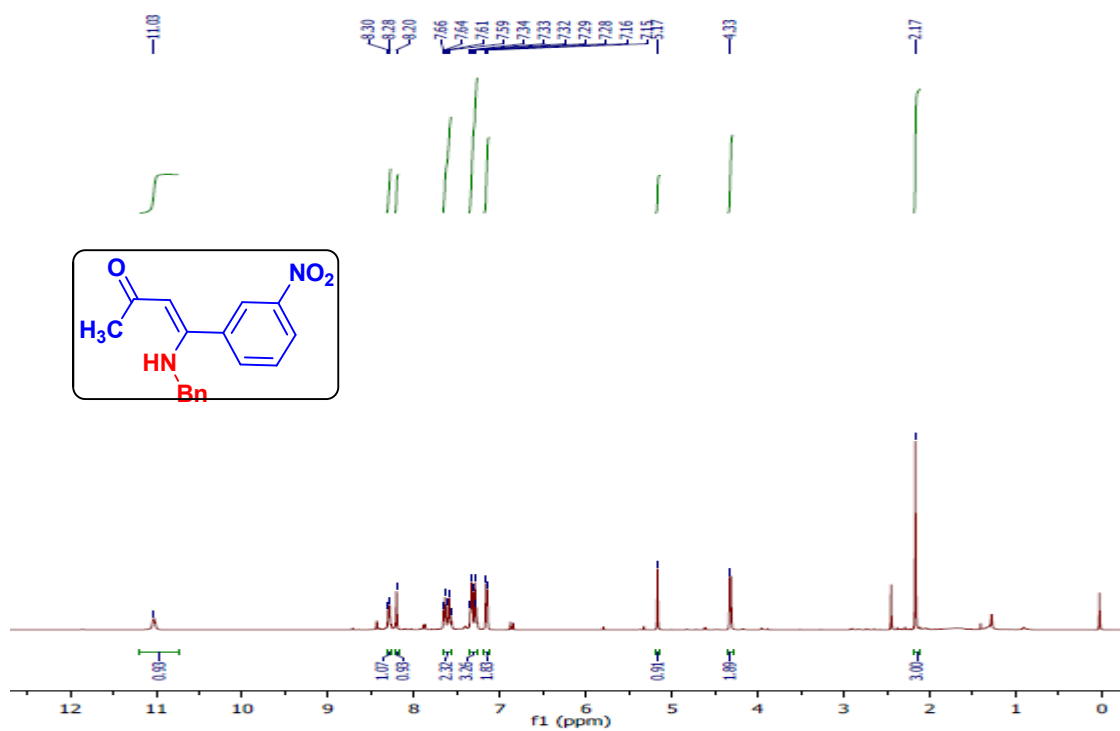

**(Z)-4-(benzylamino)-4-(3-nitrophenyl)but-3-en-2-one:**

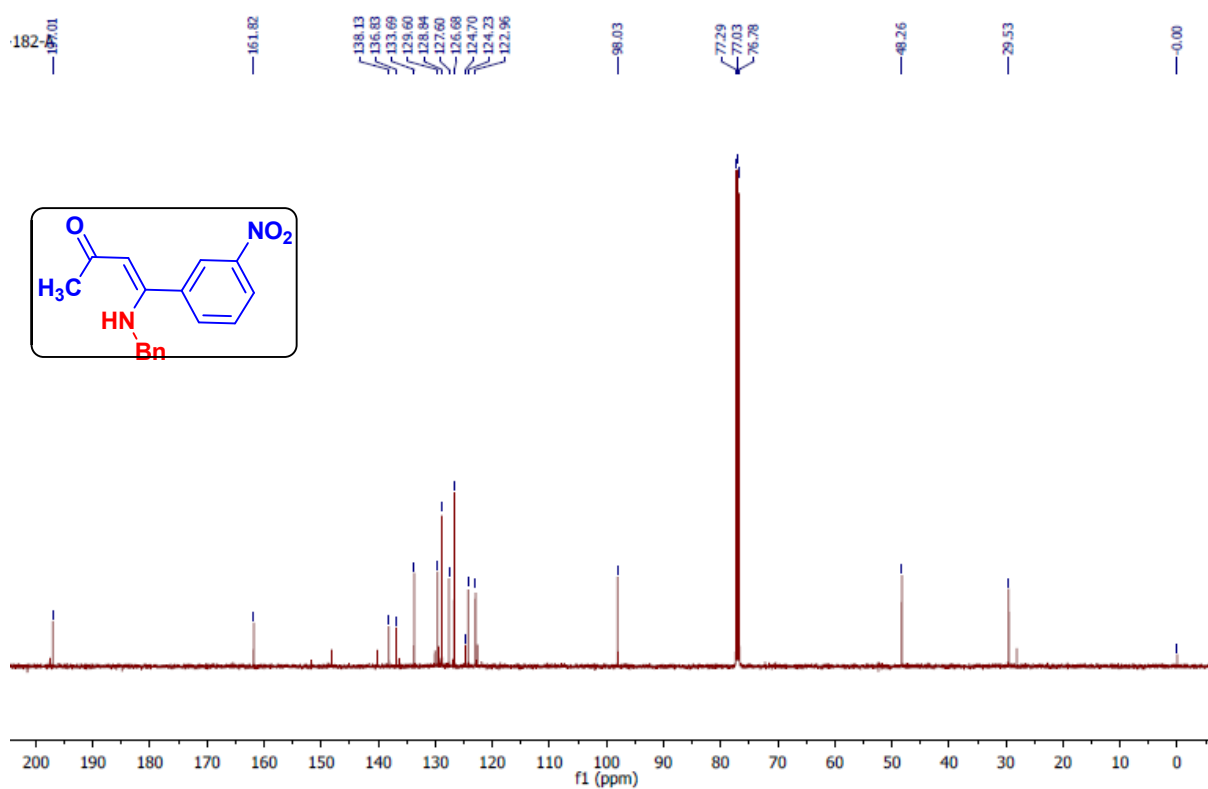

**(Z)-4-(benzylamino)-4-(3-nitrophenyl)but-3-en-2-one:**

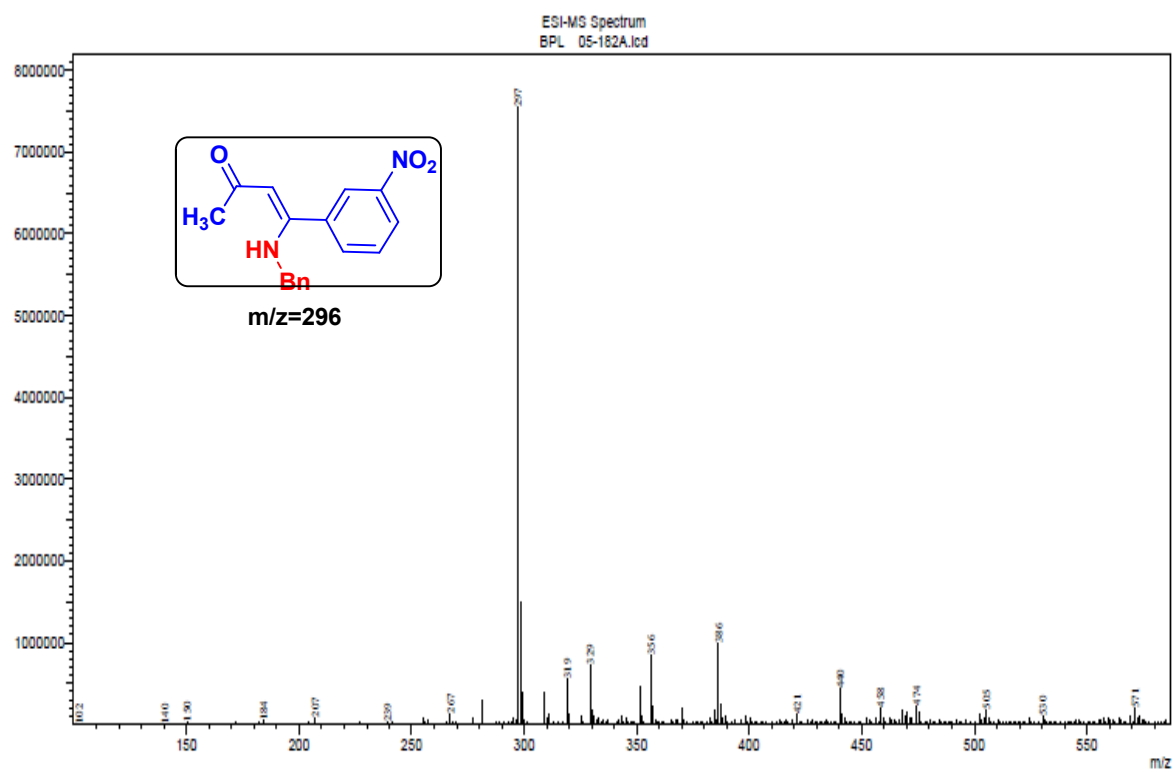

**(Z)-4-(benzylamino)-4-(naphthalene-1-yl)but-3-en-2-one:**

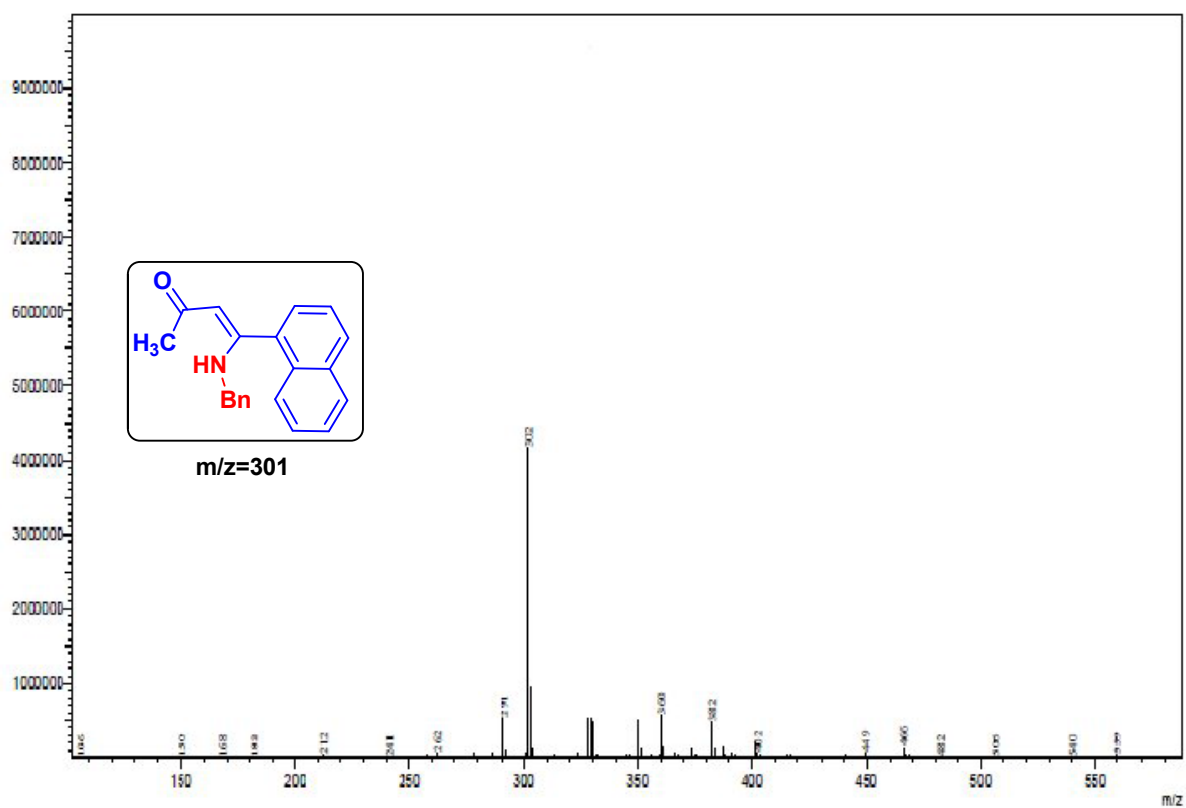

**(Z)-4-(benzylamino)-4-phenylbut-3-en-2-one:**

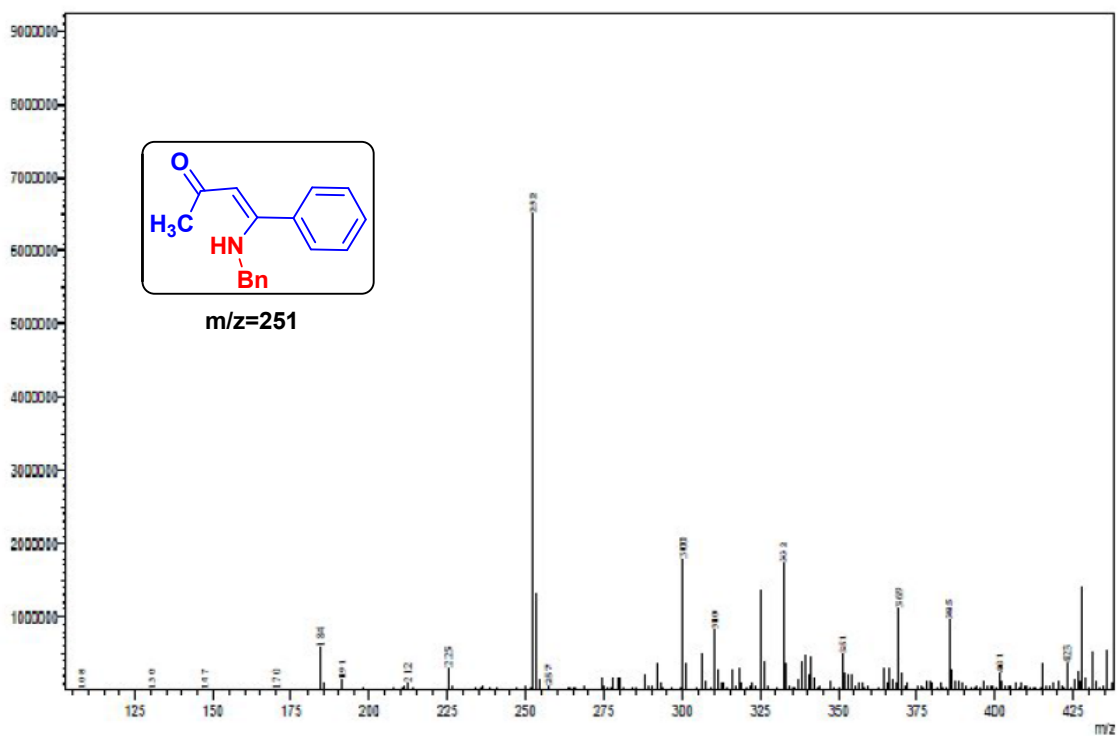

Supplement: c5ra09544a1.pdf [file c5ra09544a1.pdf]
